# Supplementary material for: Synthesis and Biological Evaluation of Novel Synthetic Indolone Derivatives as Anti-Tumor Agents Targeting p53-MDM2 and p53-MDMX
Source: MDPI journal article supplement (doi:10.3390/molecules27123721), 2022-06-09
Supplement: s1 [file s1]

Supplementary Materials

# Synthesis and Biological Evaluation of Novel Synthetic Indolone Derivatives as Anti-Tumor Agents Targeting p53-MDM2 and p53-MDMX

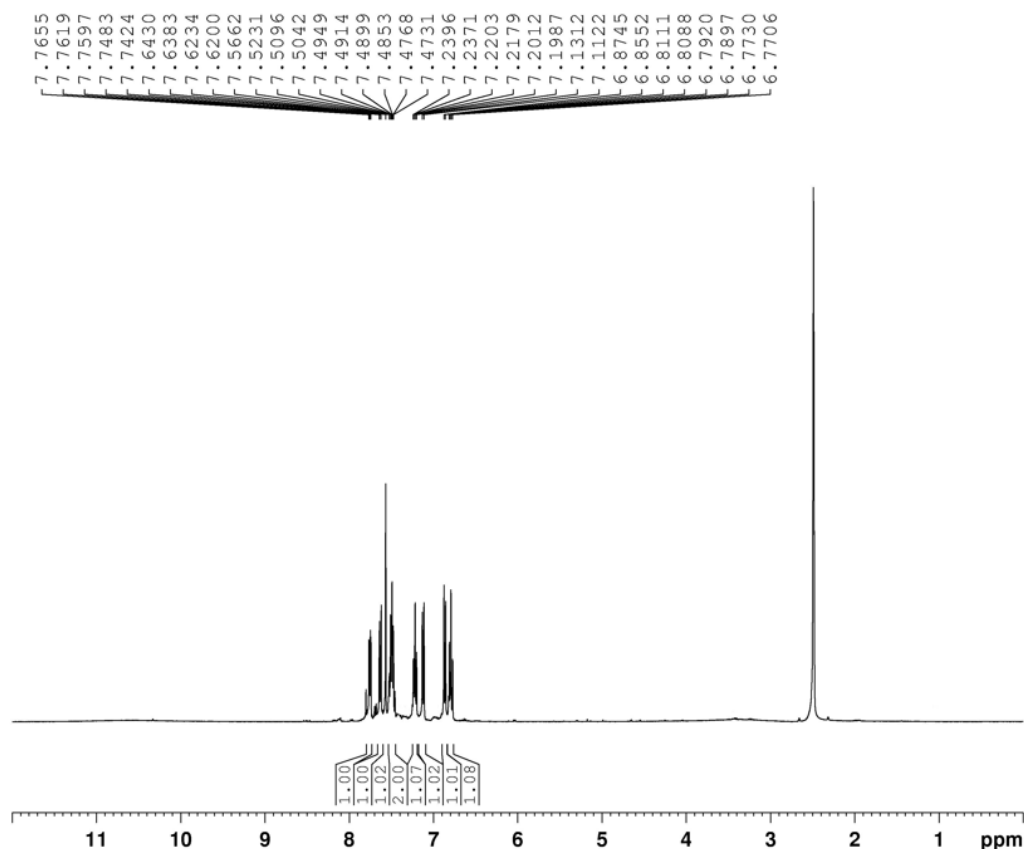

**Figure S1.** <sup>1</sup>H NMR spectrum of compound 1 (400 MHz, DMSO).

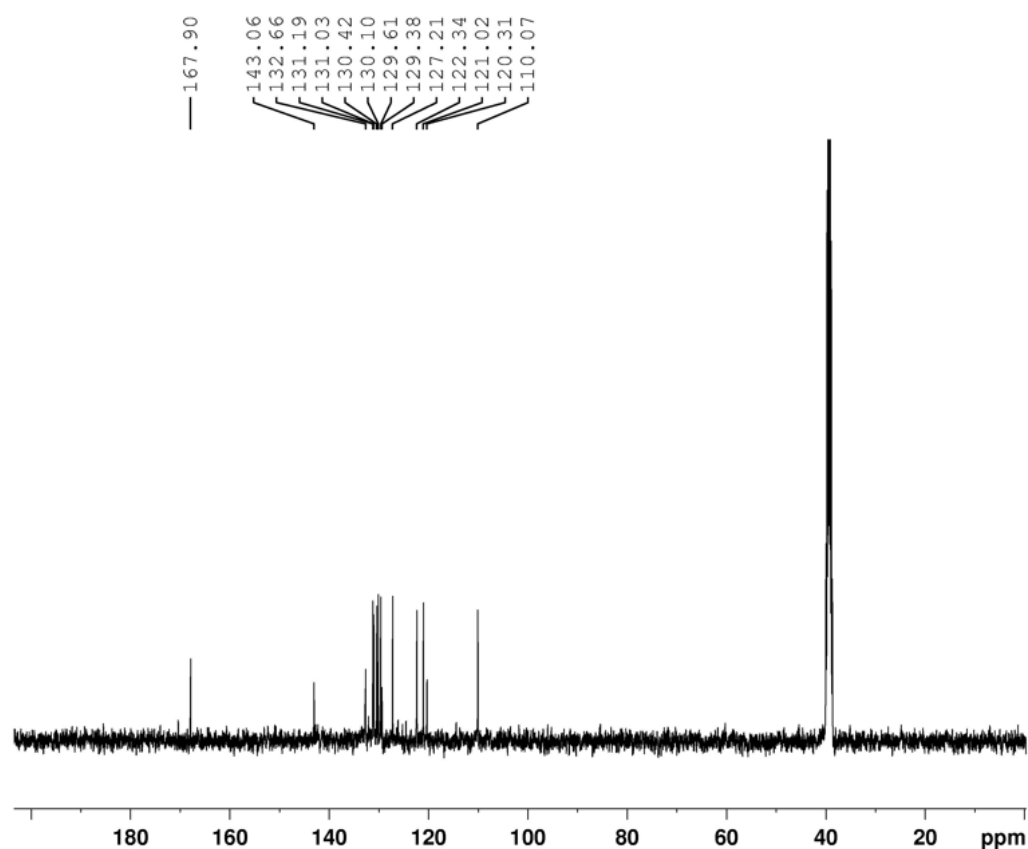

**Figure S2.**  $^{13}\text{C}$  NMR spectrum of compound 1 (101 MHz, DMSO).

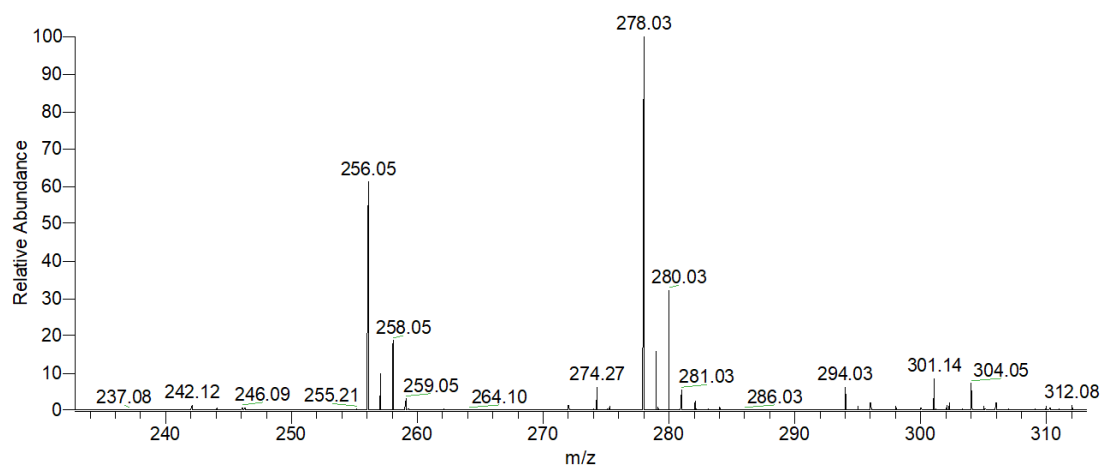

**Figure S3.** High resolution mass spectrum of compound 1.

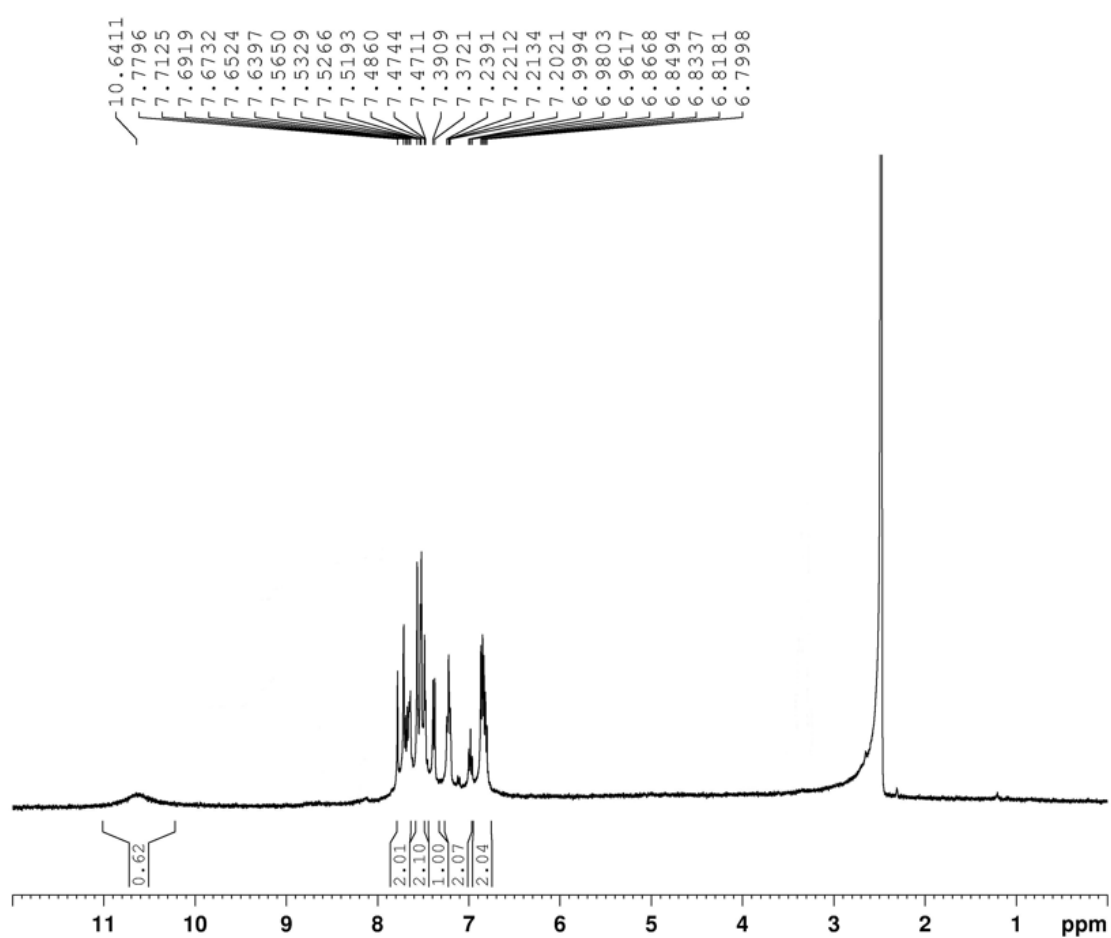

Figure S4: <sup>1</sup>H NMR spectrum of compound 2 (400 MHz, DMSO).

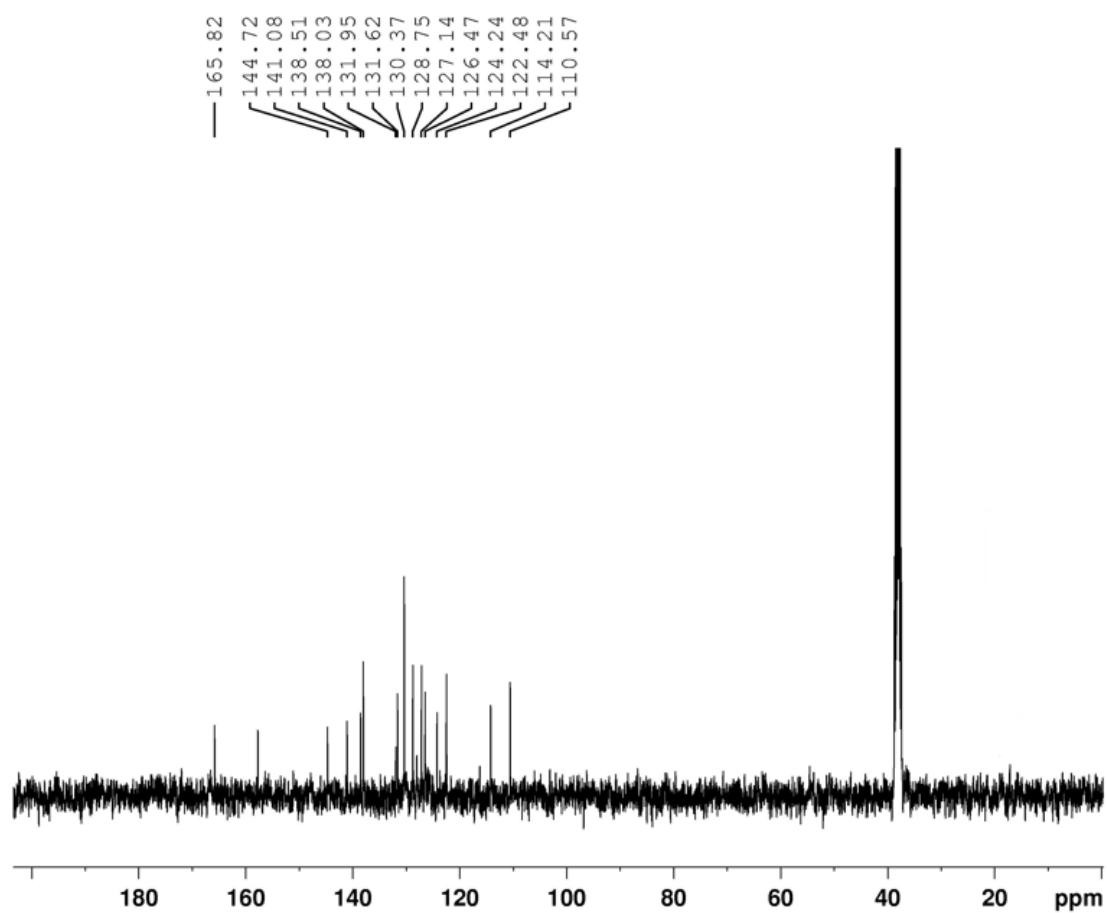

Figure S5.  $^{13}\text{C}$  NMR spectrum of compound 2 (101 MHz, DMSO).

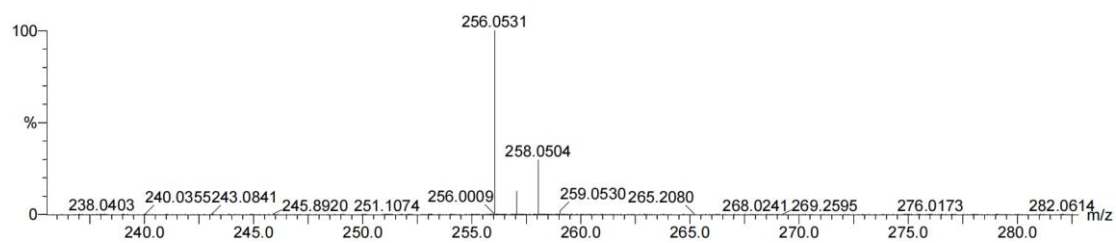

Figure S6. High resolution mass spectrum of compound 2.

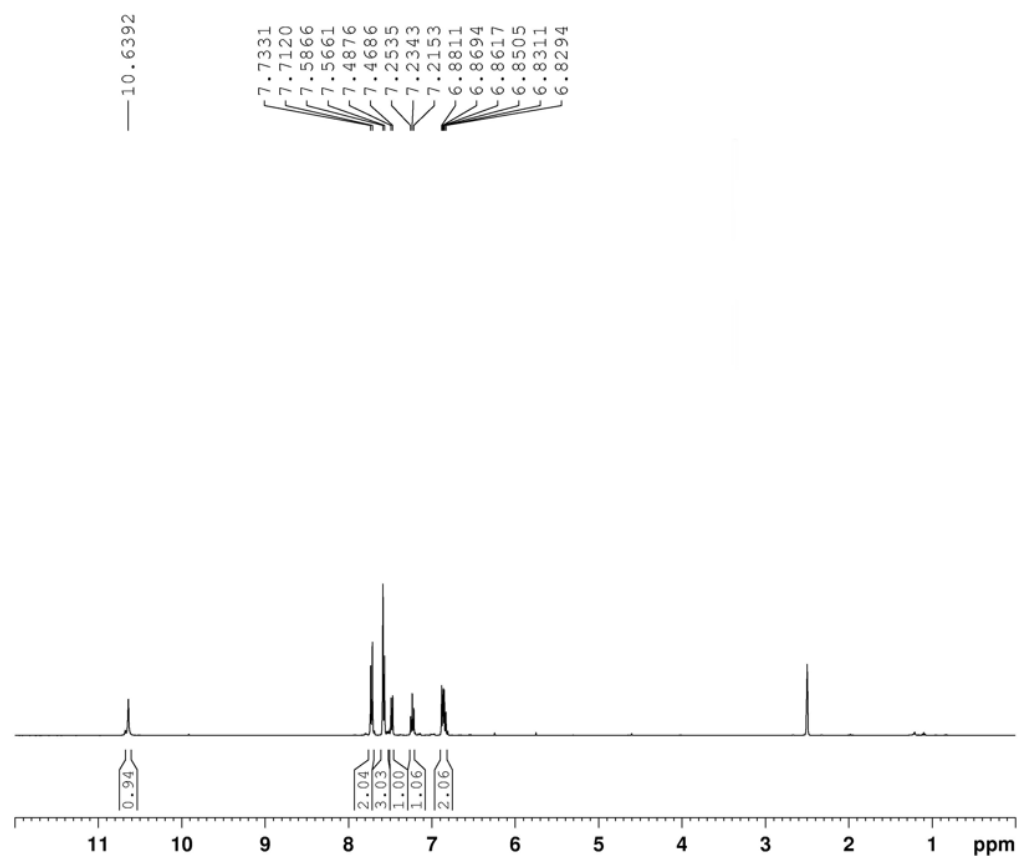

Figure S7. <sup>1</sup>H NMR spectrum of compound 3 (400 MHz, DMSO).

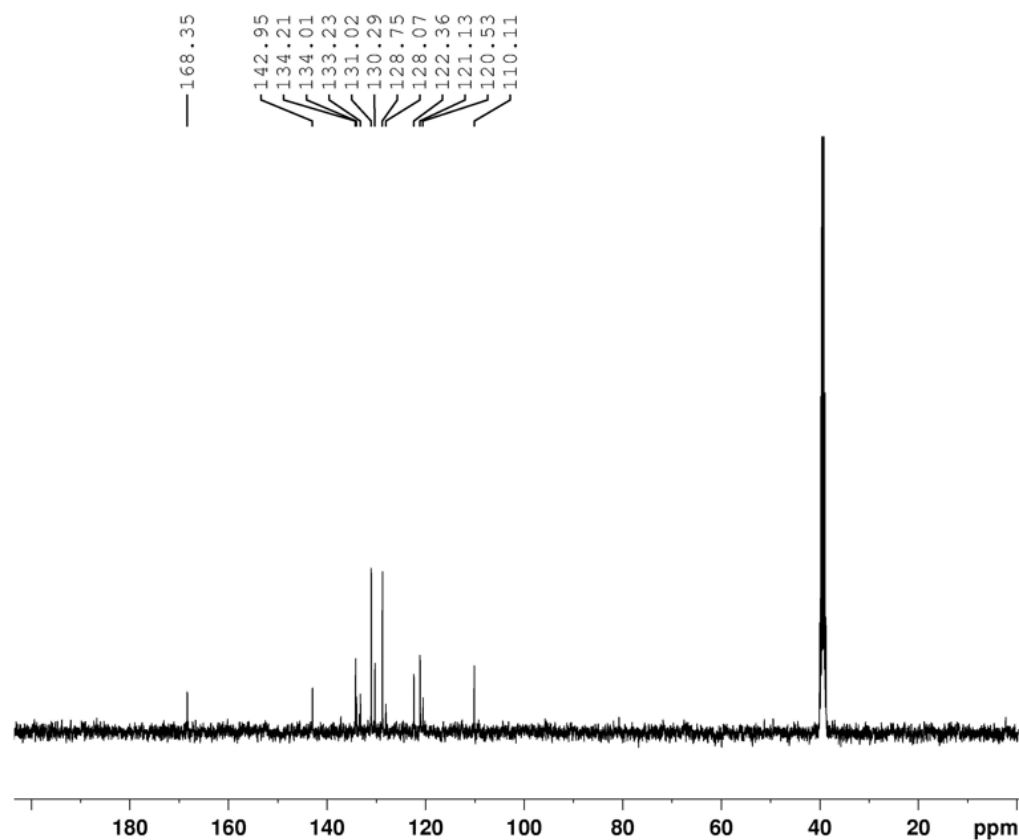

Figure S8. <sup>13</sup>C NMR spectrum of compound 3 (101 MHz, DMSO).

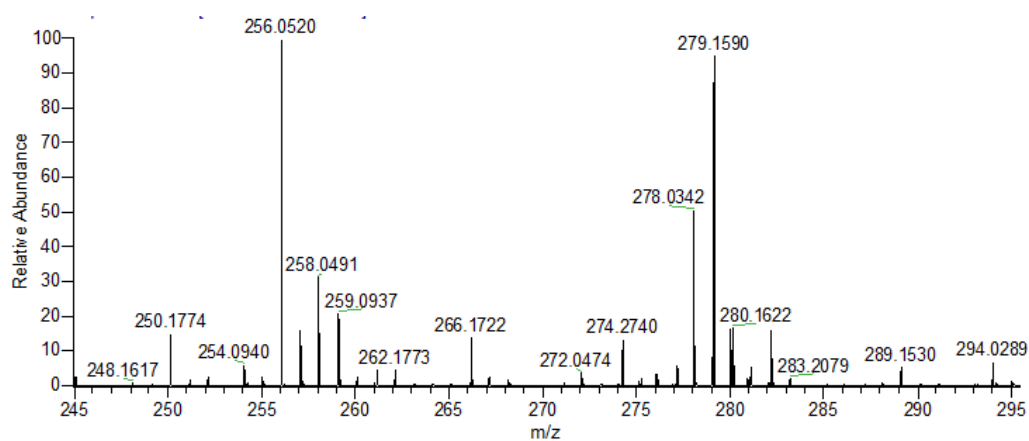

Figure S9. High resolution mass spectrum of compound 3.

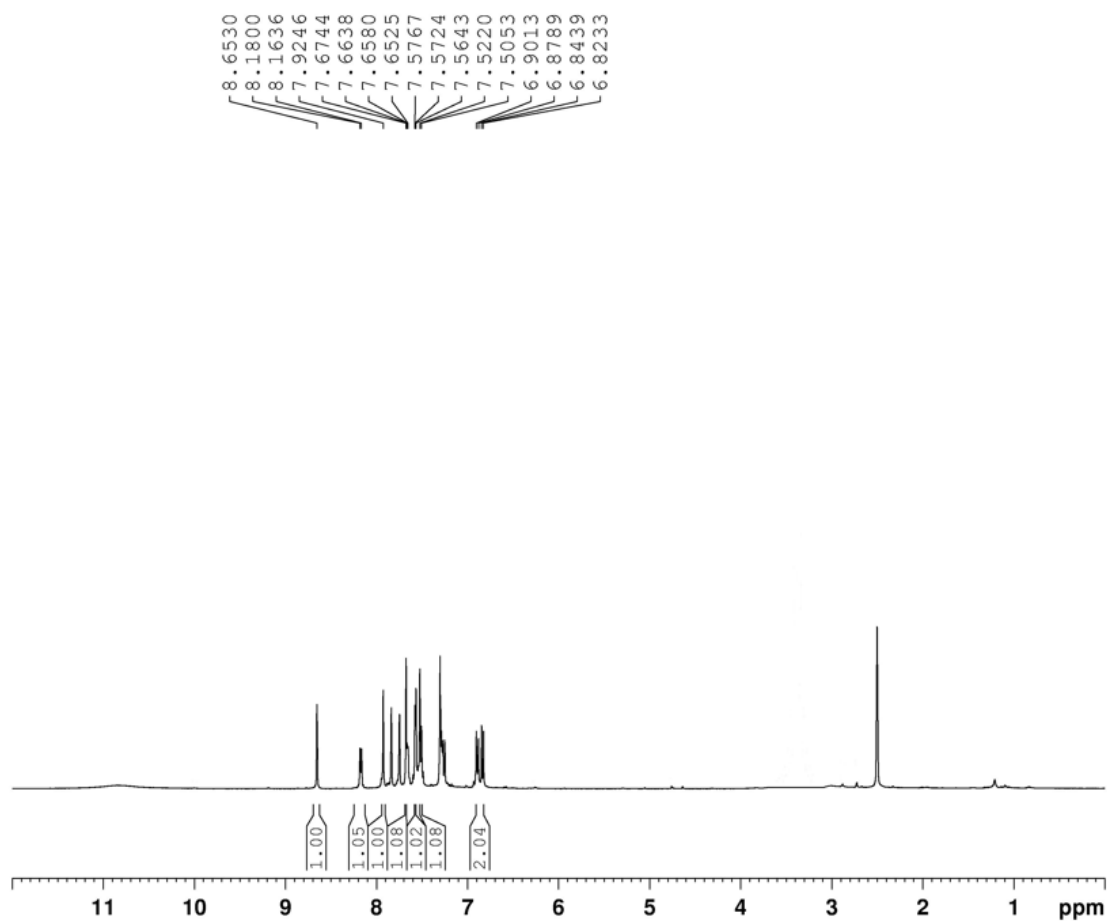

Figure S10. <sup>1</sup>H NMR spectrum of compound 4 (400 MHz, DMSO).

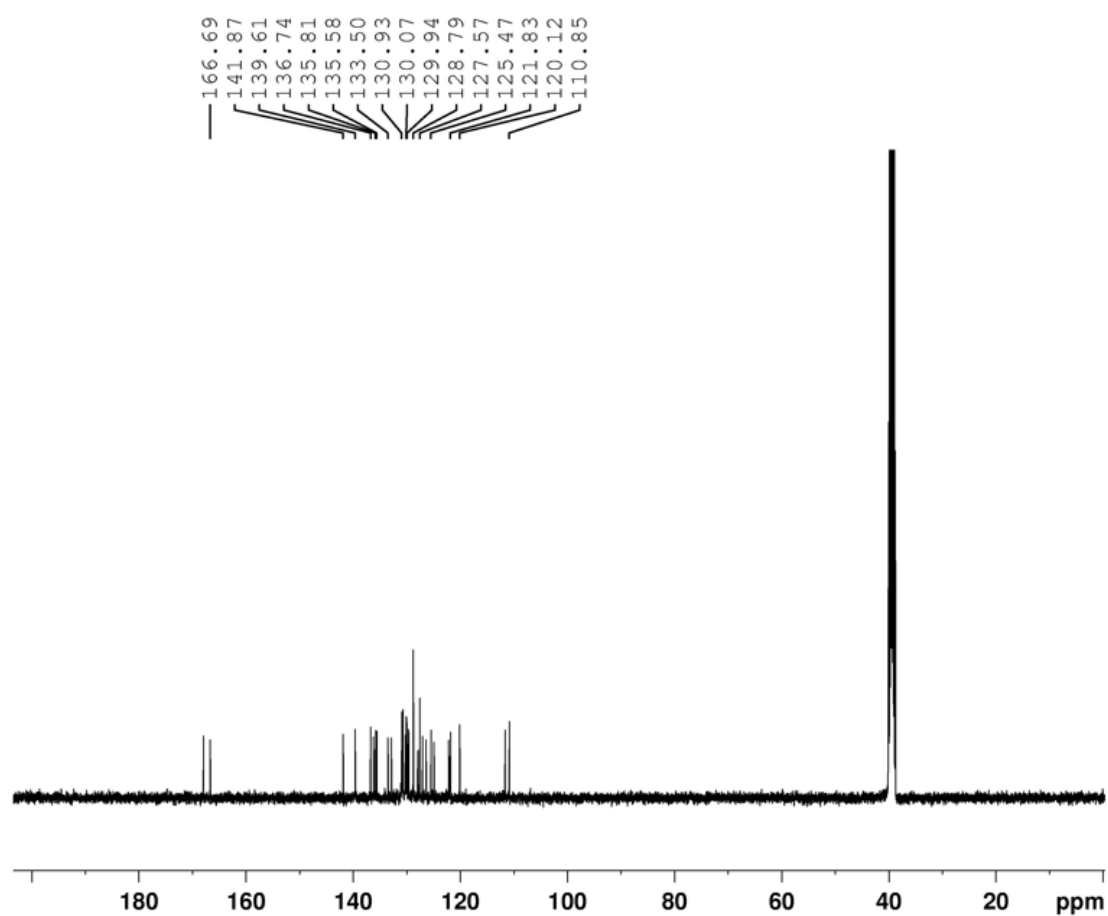

Figure S11.  $^{13}\text{C}$  NMR spectrum of compound 4 (101 MHz, DMSO).

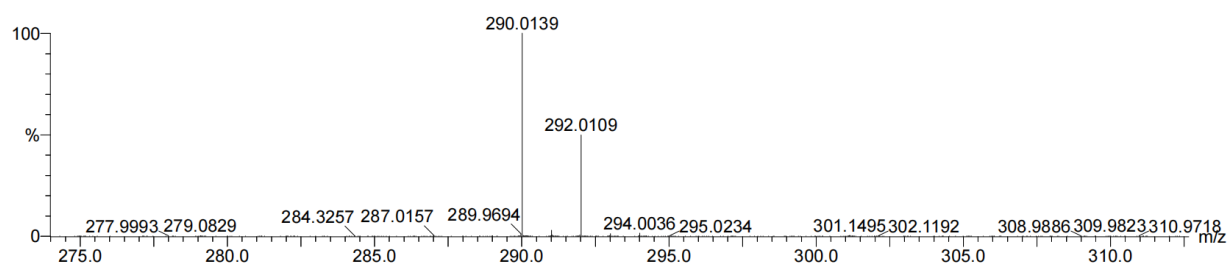

Figure S12. High resolution mass spectrum of compound 4.

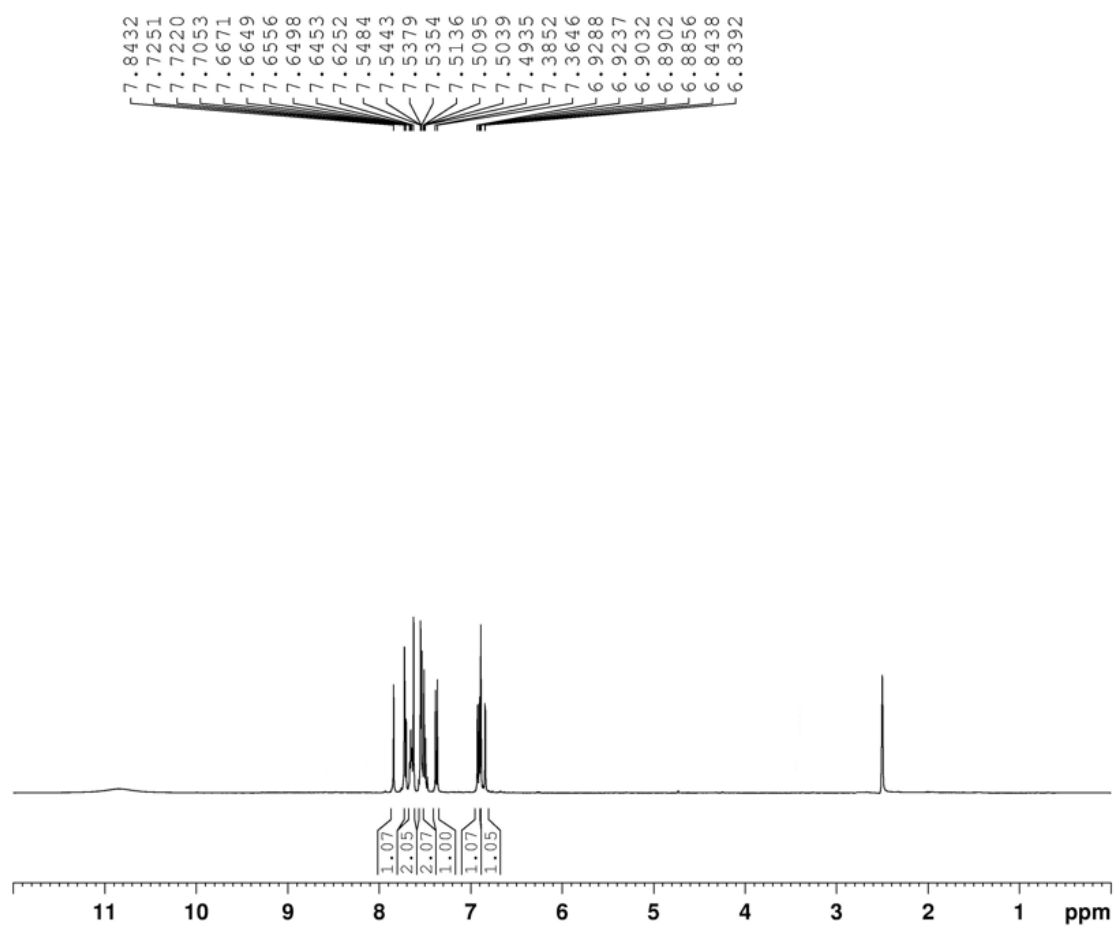

**Figure S13.**  $^1\text{H}$  NMR spectrum of compound 5 (400 MHz, DMSO).



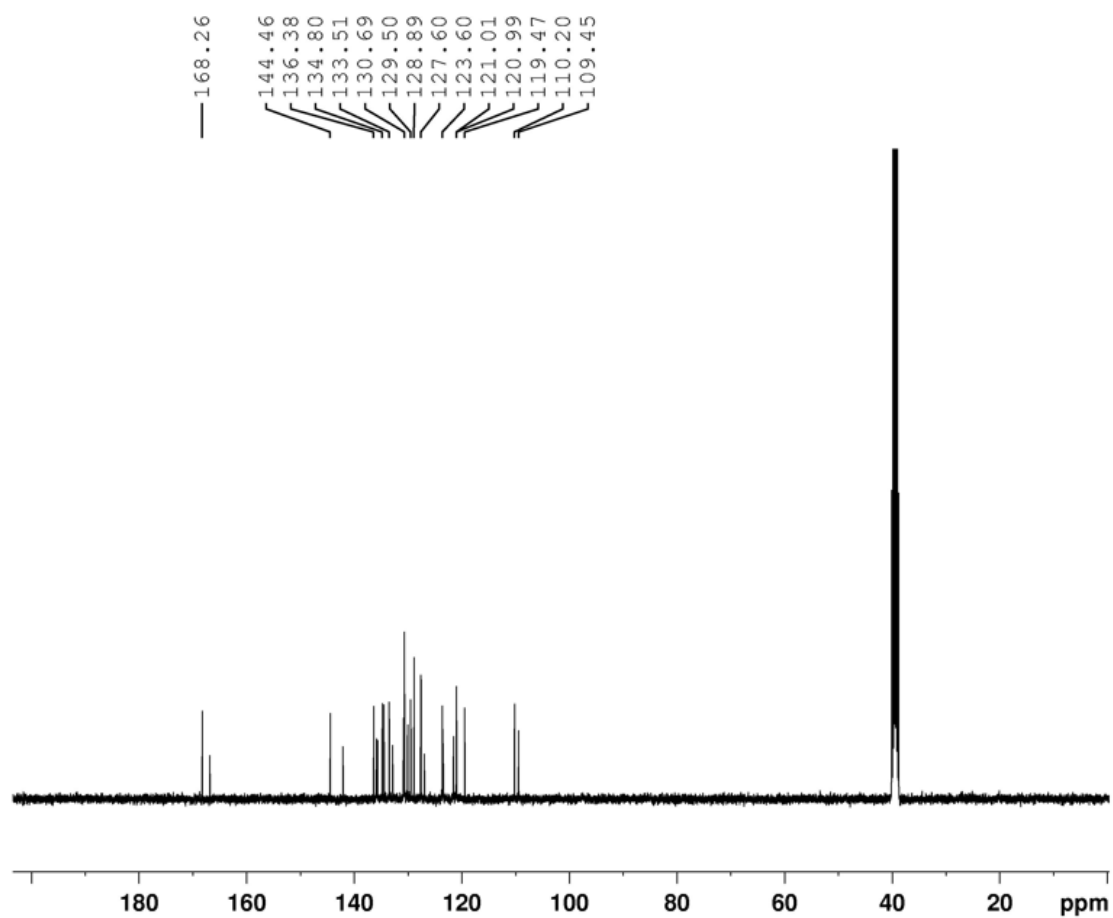

Figure S14.  $^{13}\text{C}$  NMR spectrum of compound 5 (101 MHz, DMSO).

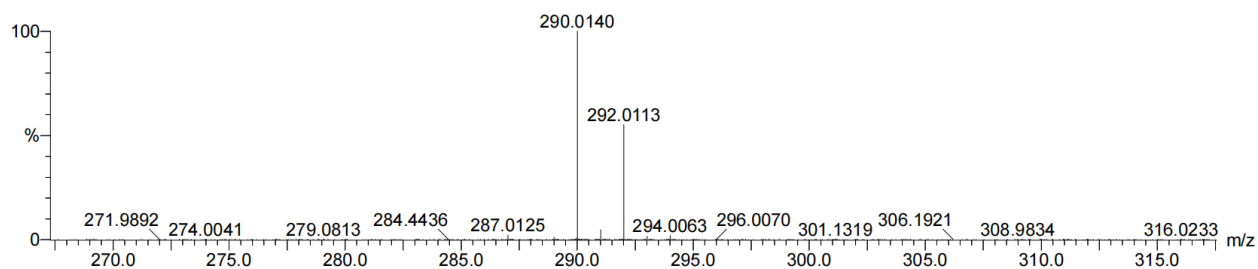

Figure S15. High resolution mass spectrum of compound 5.

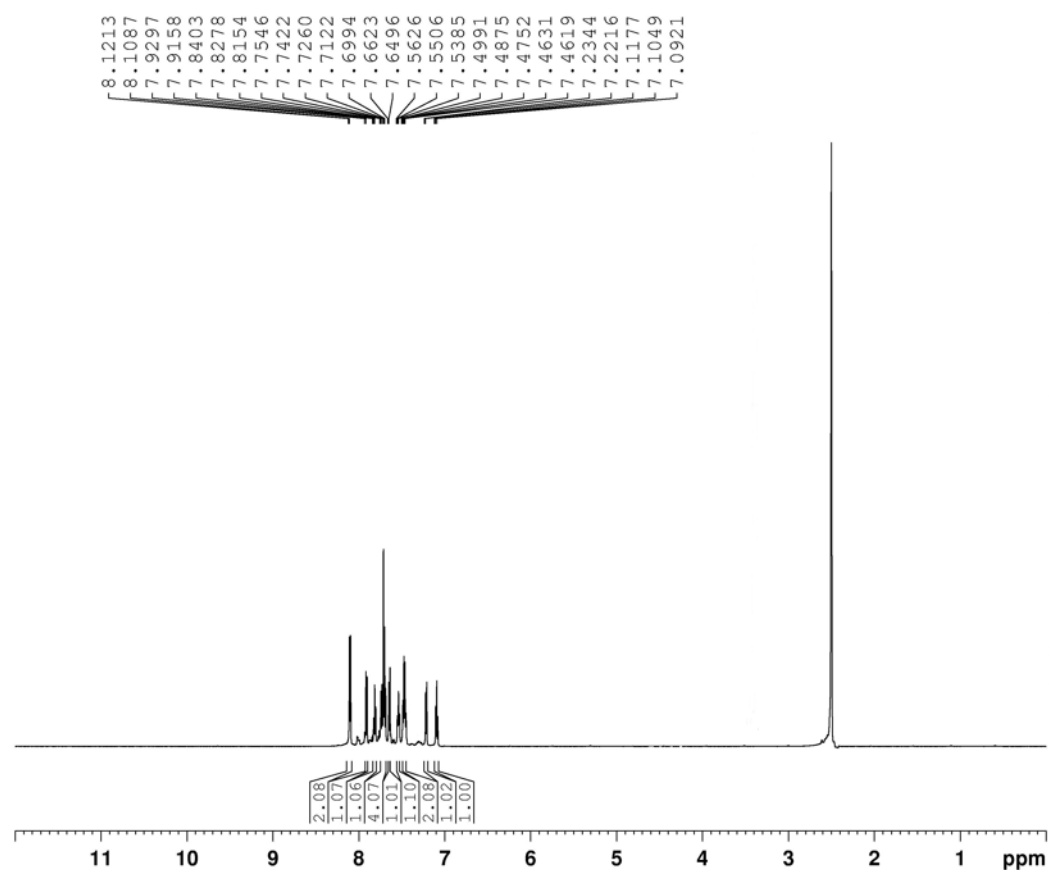

Figure S16. <sup>1</sup>H NMR spectrum of compound A1 (600 MHz, DMSO).

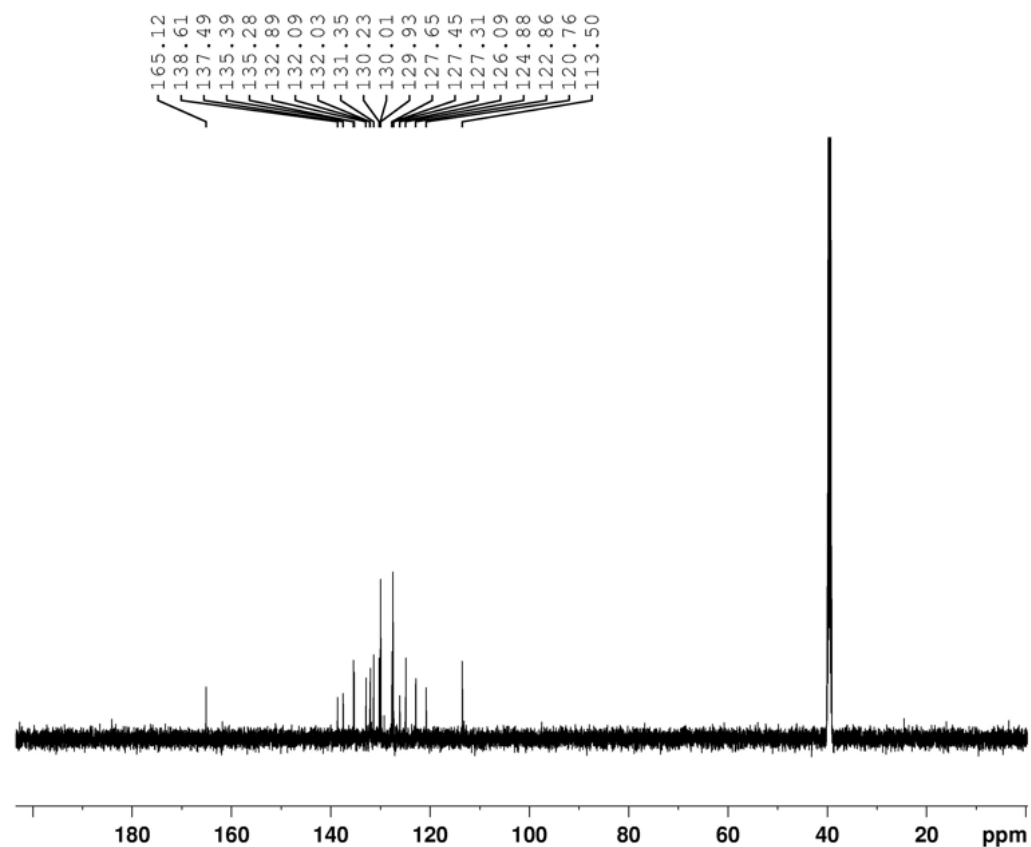

Figure S17. <sup>13</sup>C NMR spectrum of compound A1 (151 MHz, DMSO).

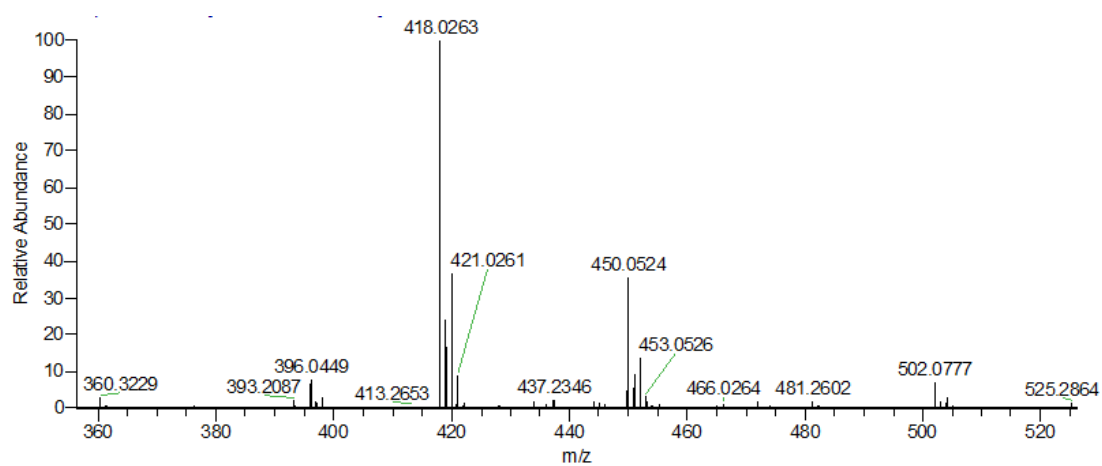

Figure S18. High resolution mass spectrum of compound A1.

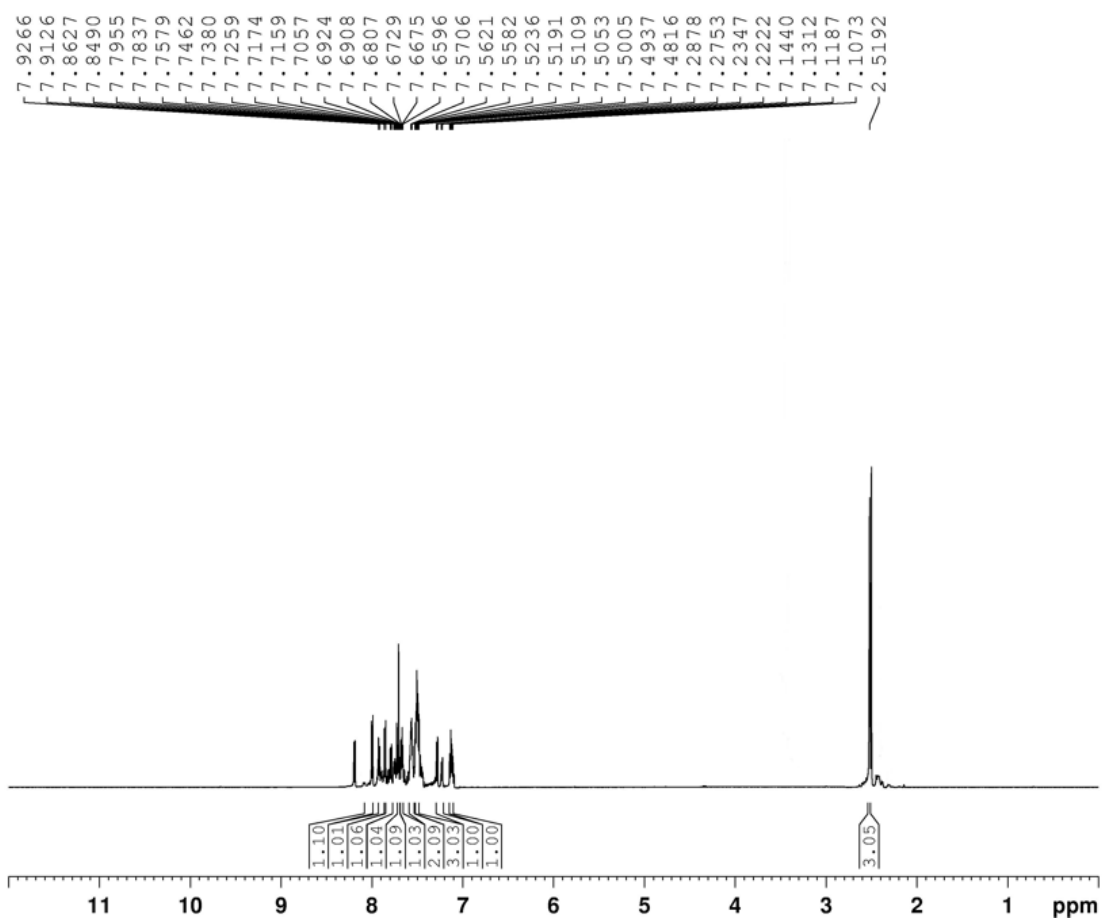

Figure S19. <sup>1</sup>H NMR spectrum of compound A2 (600 MHz, DMSO).

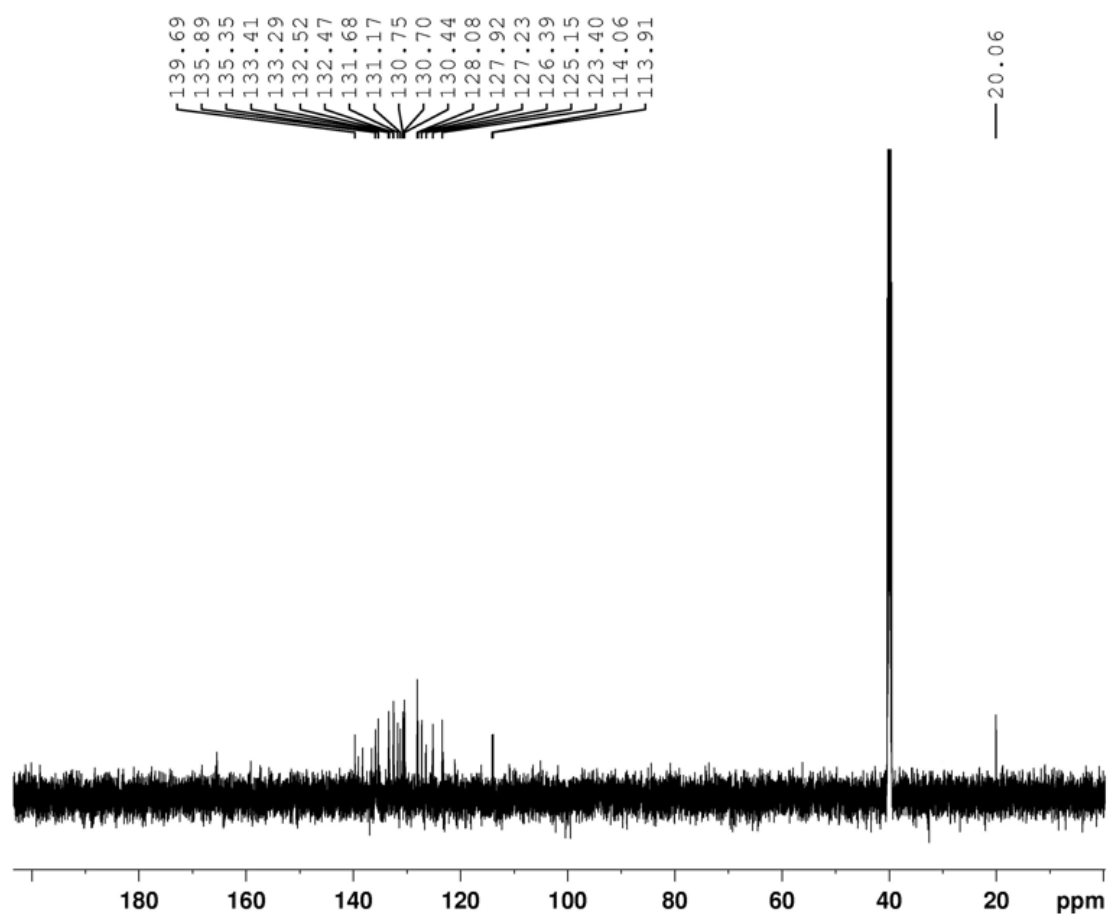

Figure S20. <sup>13</sup>C NMR spectrum of compound A2 (151 MHz, DMSO).

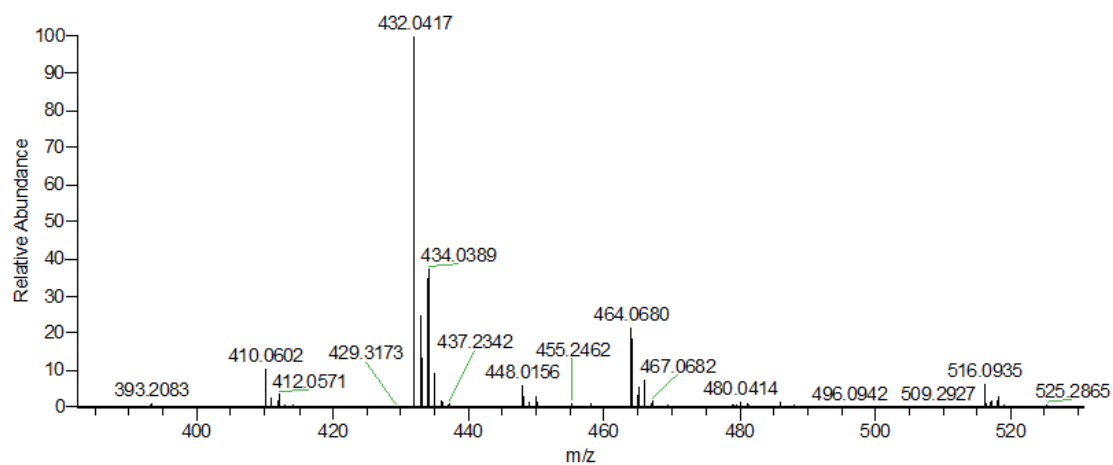

Figure S21. High resolution mass spectrum of compound A2.

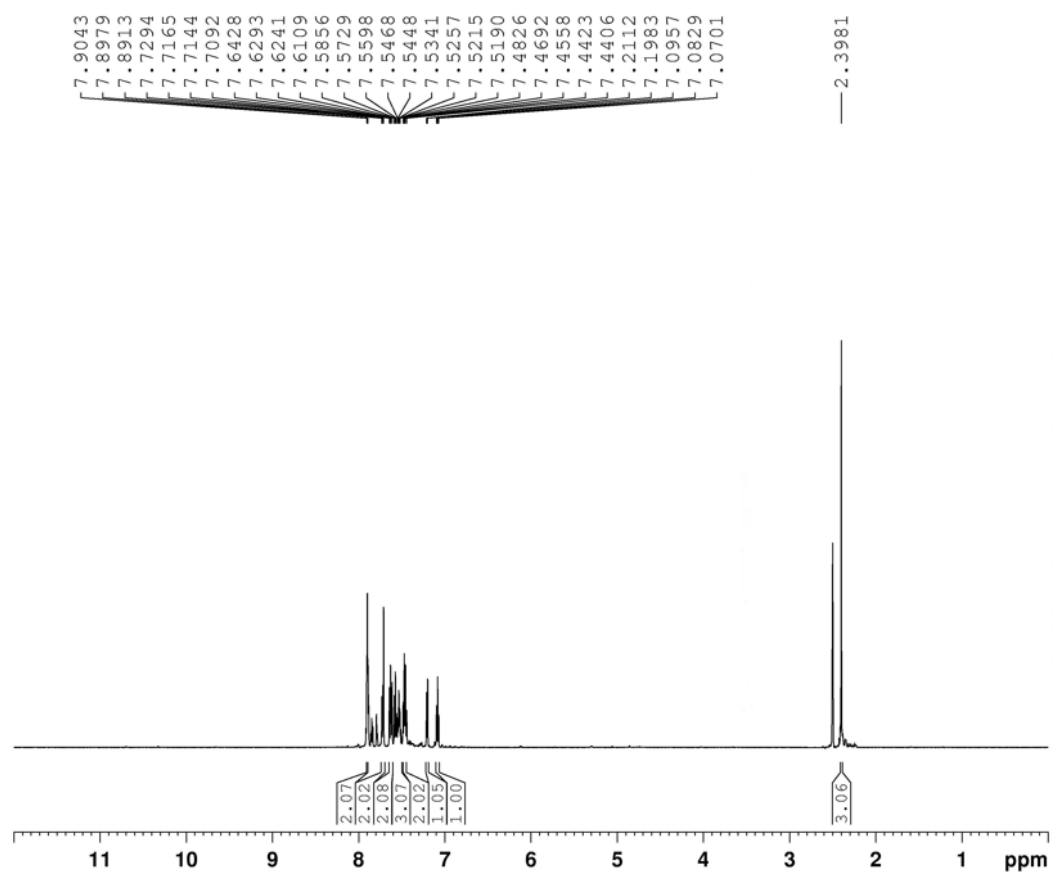

Figure S22. <sup>1</sup>H NMR spectrum of compound A3 (600 MHz, DMSO).

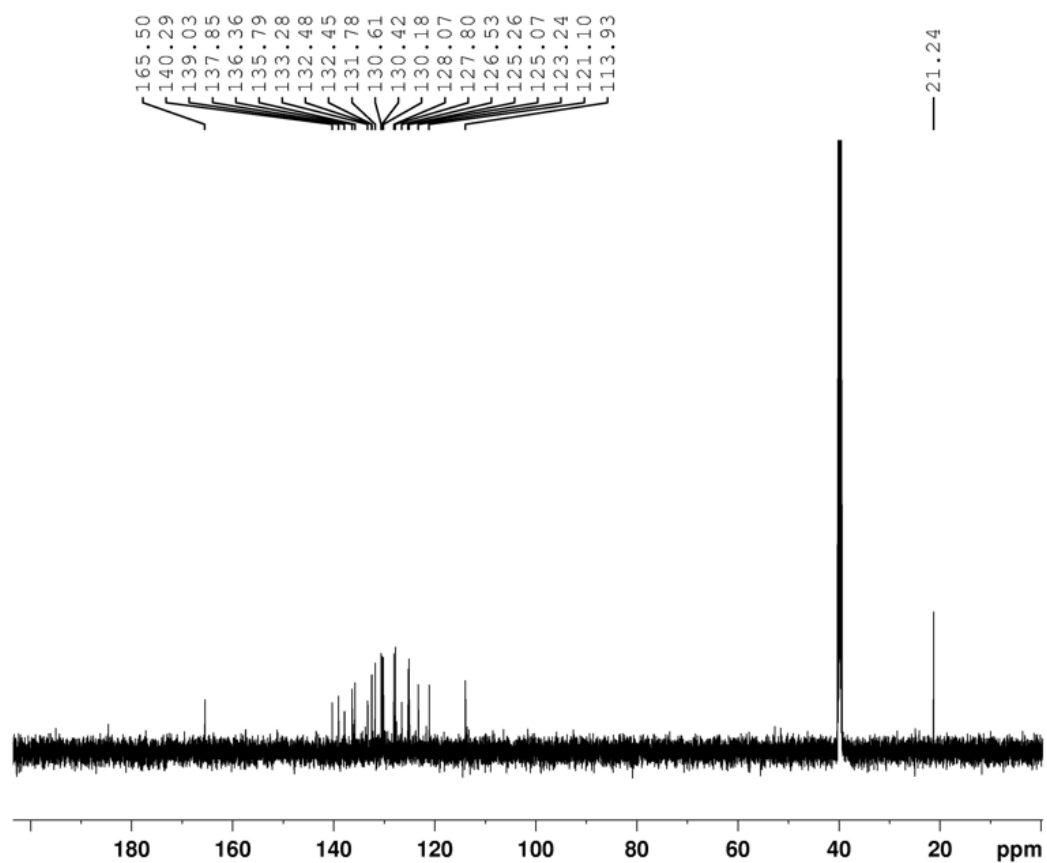

Figure S23. <sup>13</sup>C NMR spectrum of compound A3 (151 MHz, DMSO).

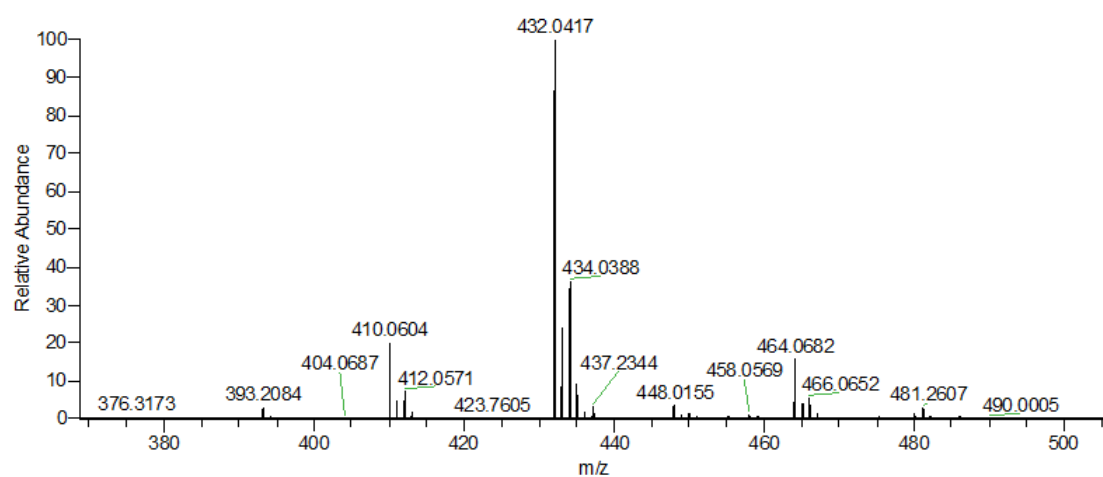

Figure S24. High resolution mass spectrum of compound A3.

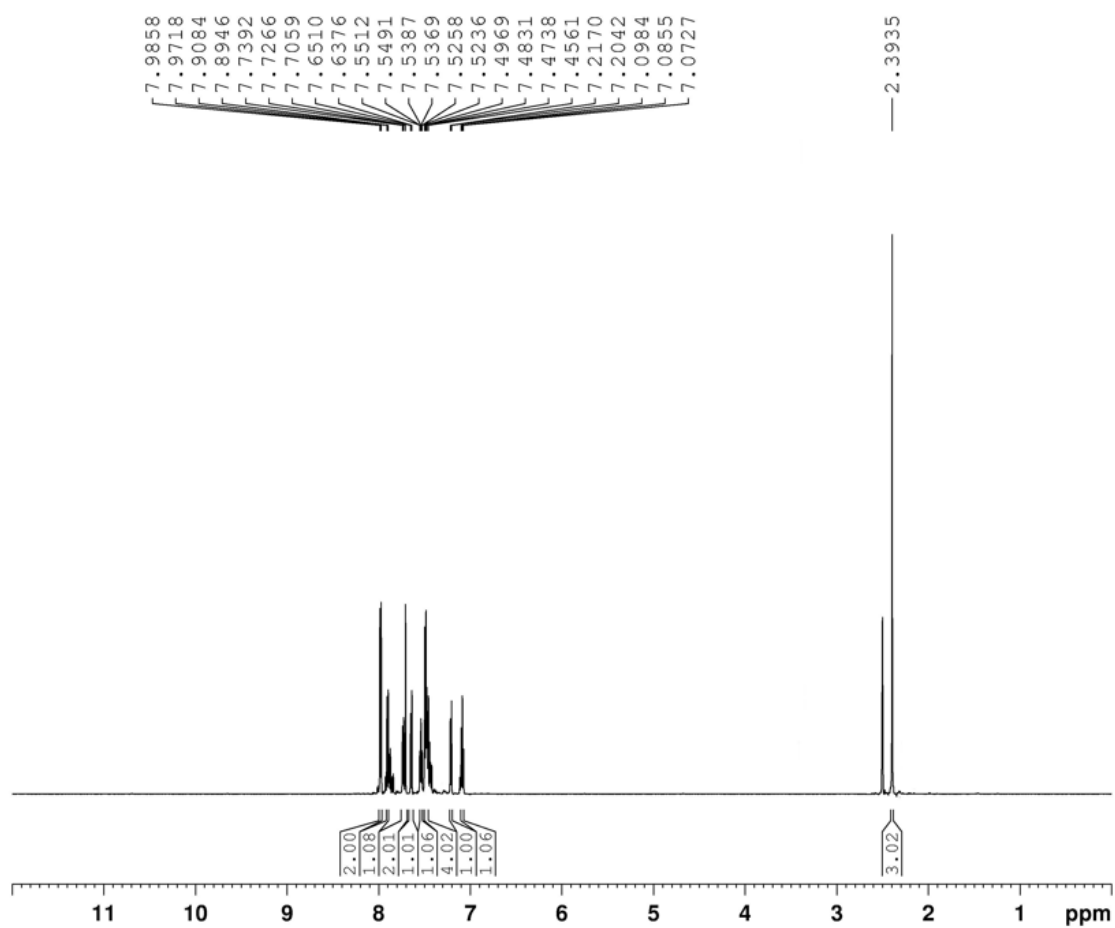

Figure S25. <sup>1</sup>H NMR spectrum of compound A4 (600 MHz, DMSO).

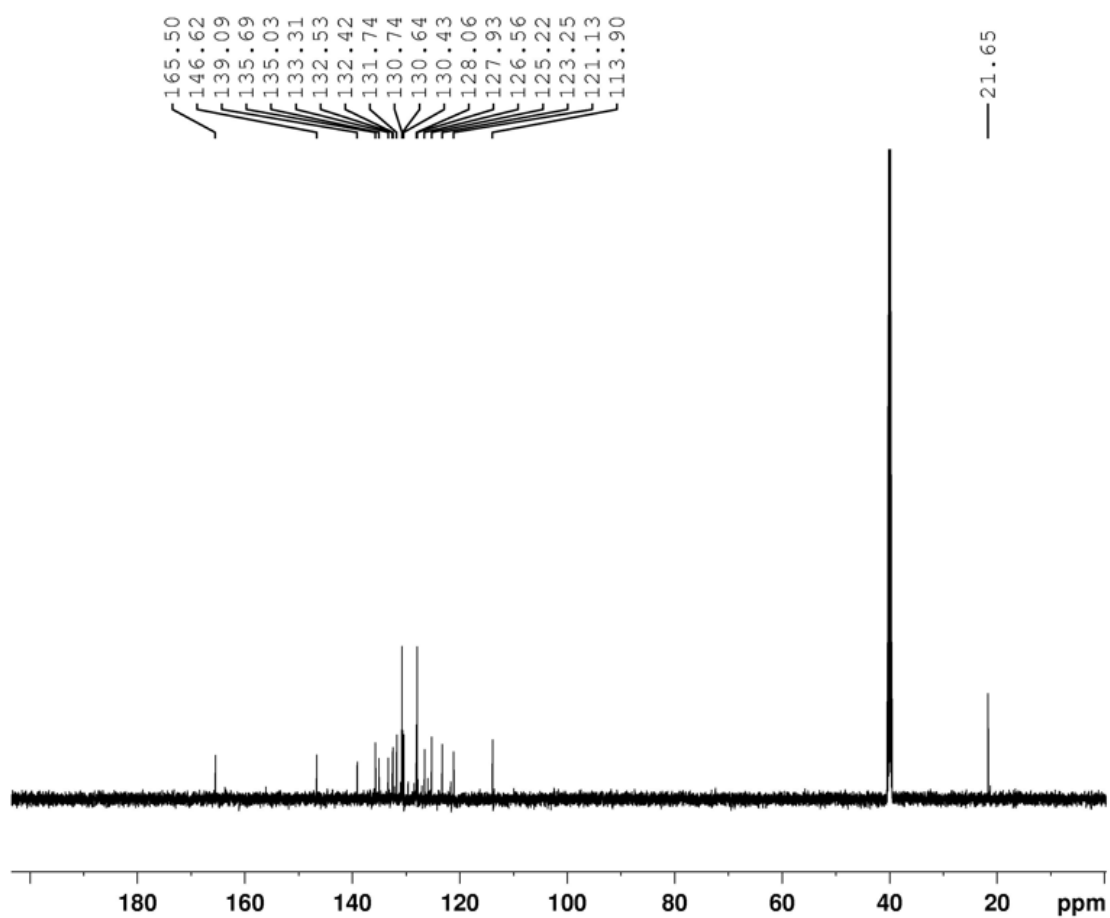

Figure S26. <sup>13</sup>C NMR spectrum of compound A4 (151 MHz, DMSO).

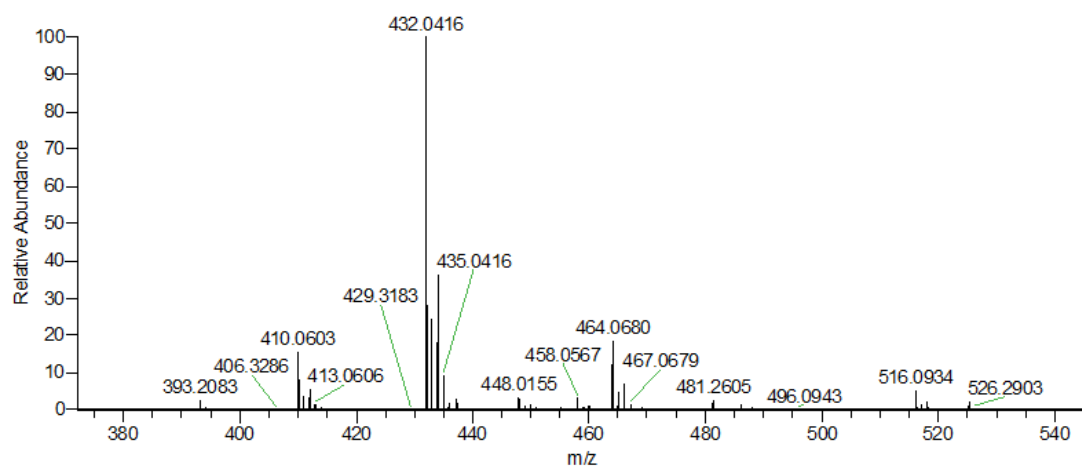

Figure S27. High resolution mass spectrum of compound A4.

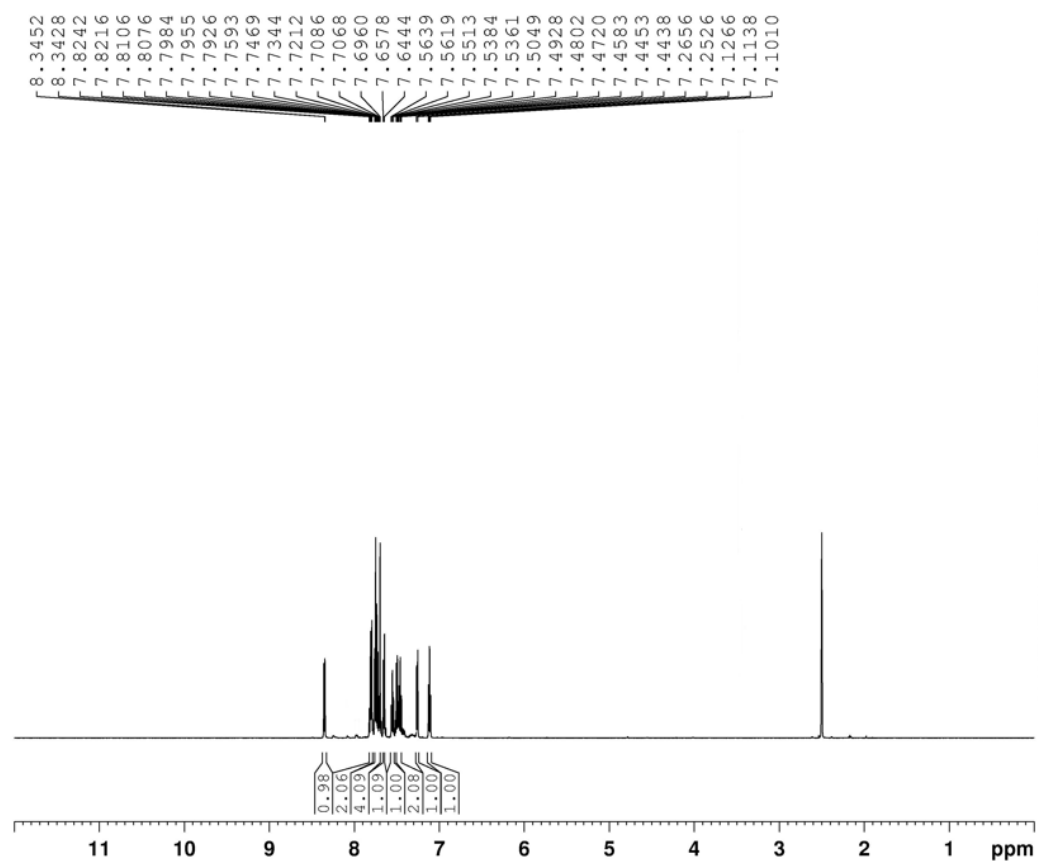

Figure S28. <sup>1</sup>H NMR spectrum of compound A5 (600 MHz, DMSO).

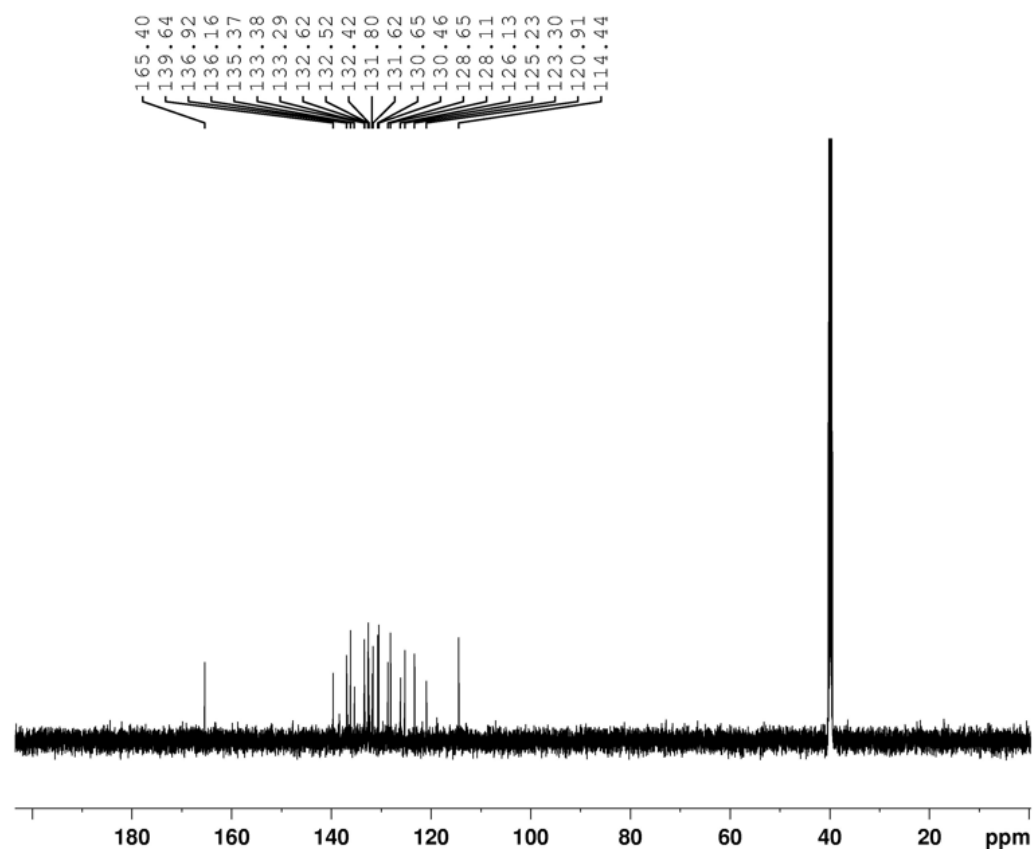

Figure S29. <sup>13</sup>C NMR spectrum of compound A5 (151 MHz, DMSO).



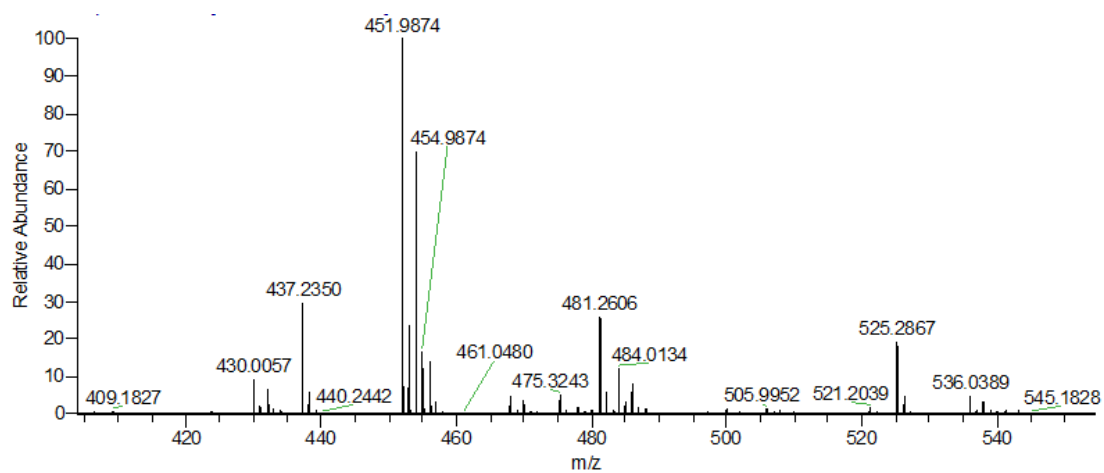

Figure S30. High resolution mass spectrum of compound A5.

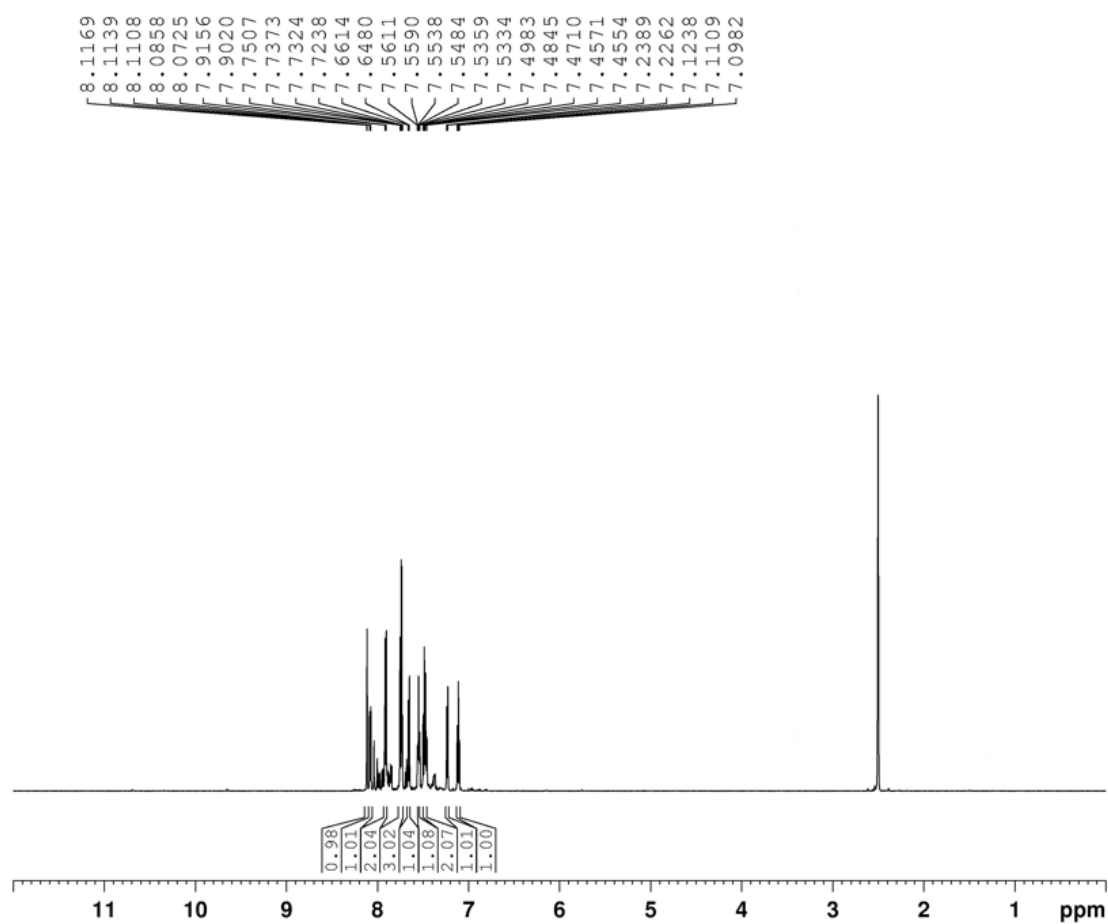

Figure S31. <sup>1</sup>H NMR spectrum of compound A6 (600 MHz, DMSO).

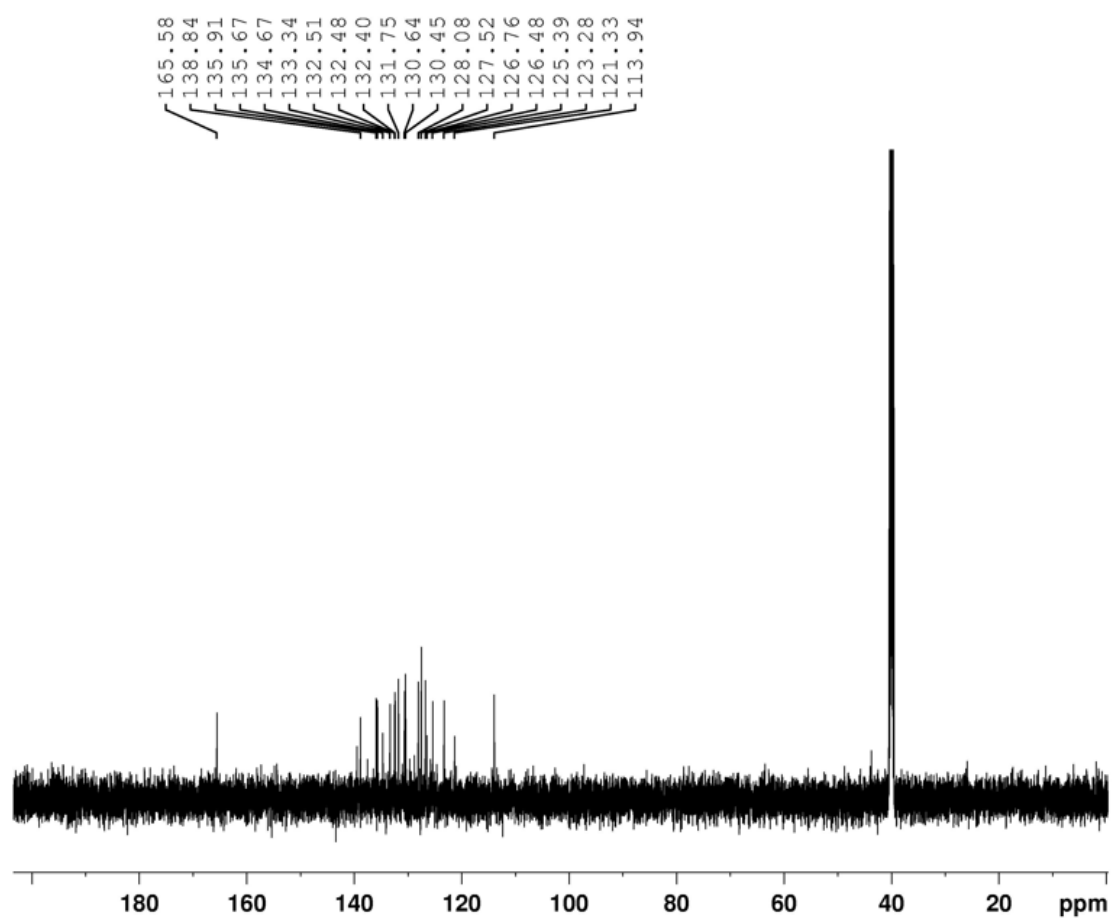

Figure S32. <sup>13</sup>C NMR spectrum of compound A6 (151 MHz, DMSO).

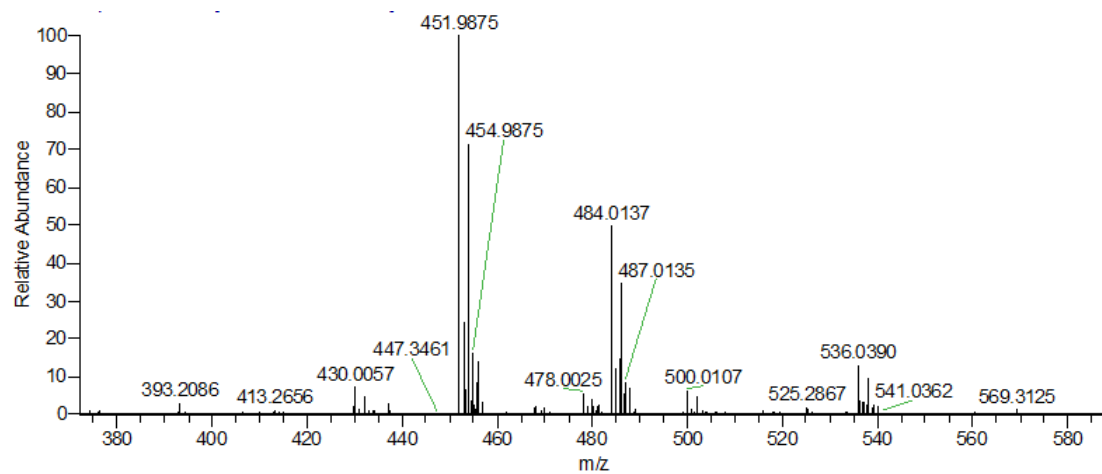

Figure S33. High resolution mass spectrum of compound A6.

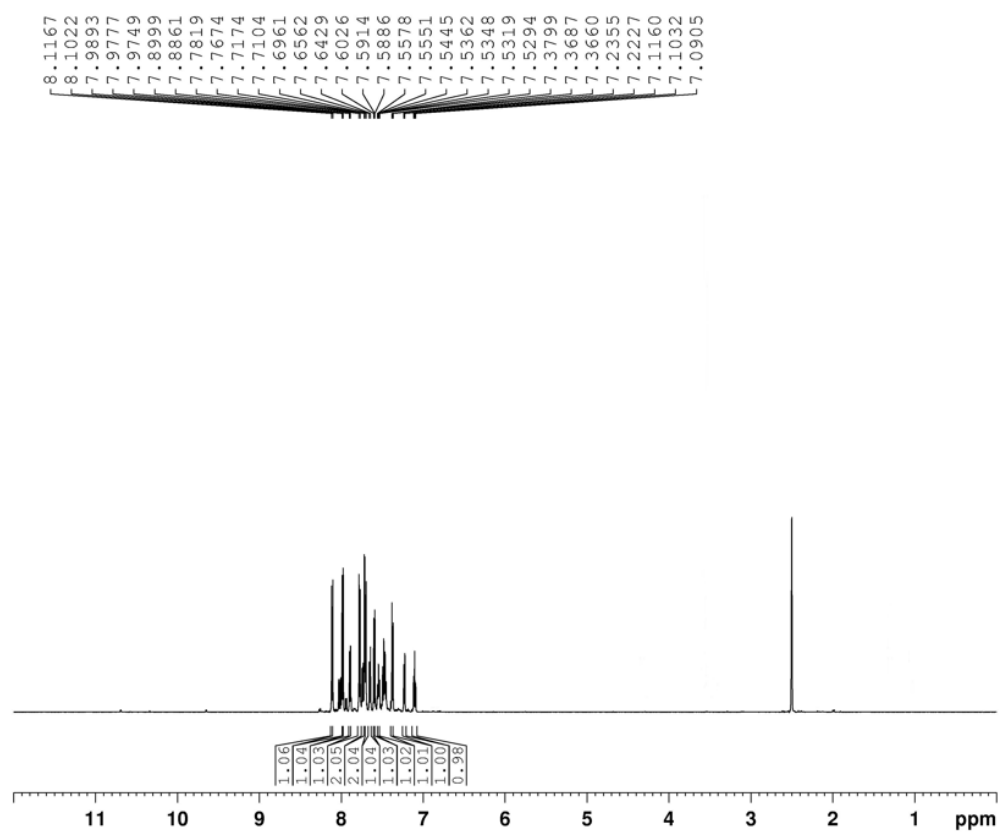

**Figure S34.** <sup>1</sup>H NMR spectrum of compound A7 (600 MHz, DMSO).

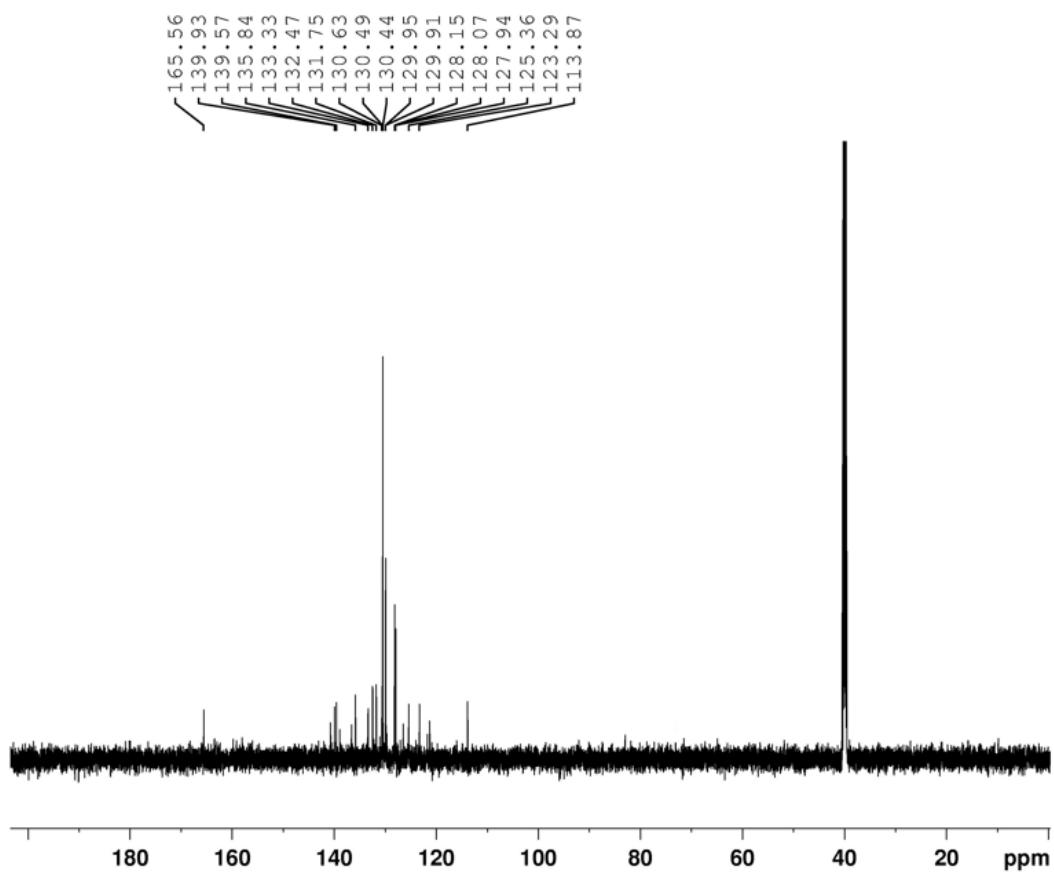

**Figure S35.** <sup>13</sup>C NMR spectrum of compound A7 (151 MHz, DMSO).

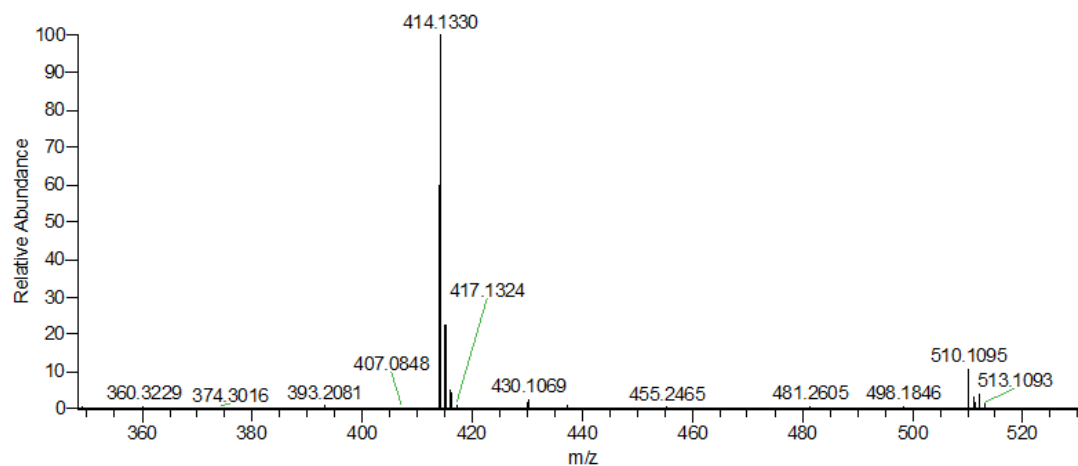

Figure S36. High resolution mass spectrum of compound A7.

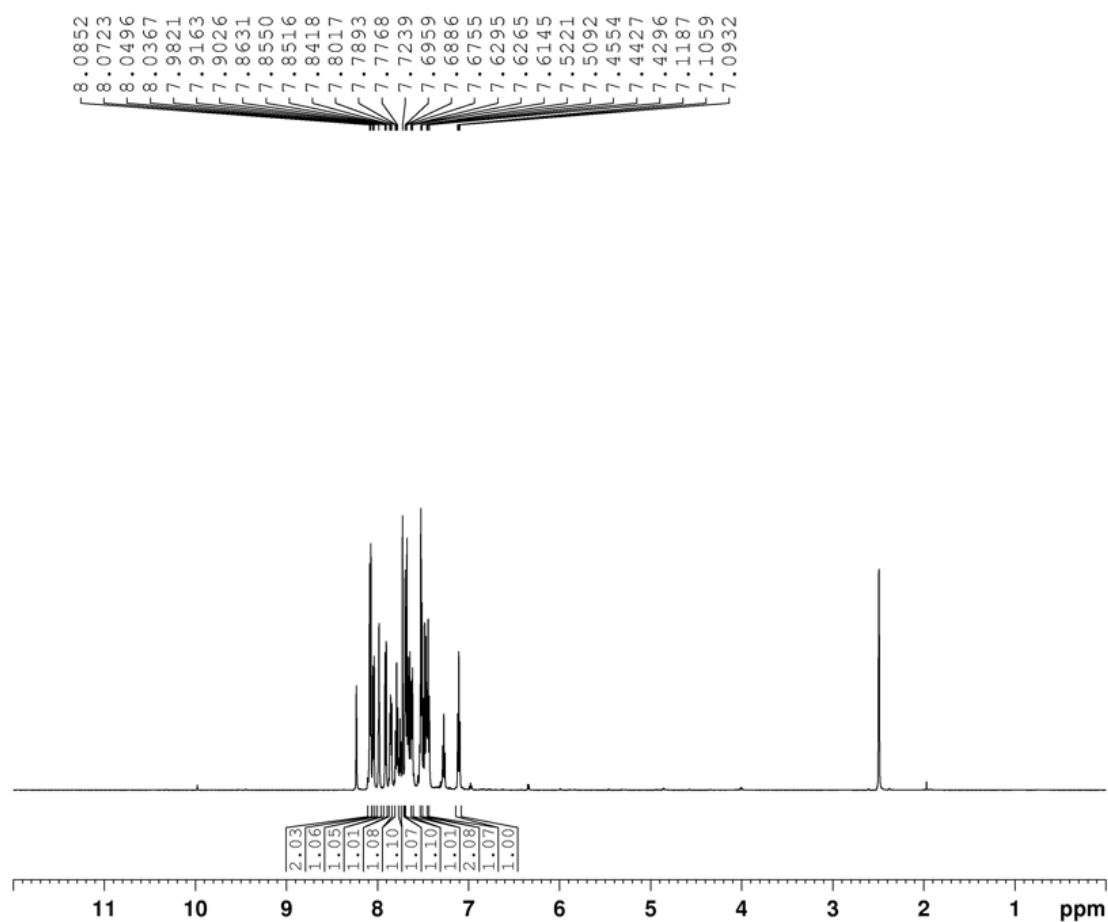

Figure S37.  $^1\text{H}$  NMR spectrum of compound A8 (600 MHz, DMSO).

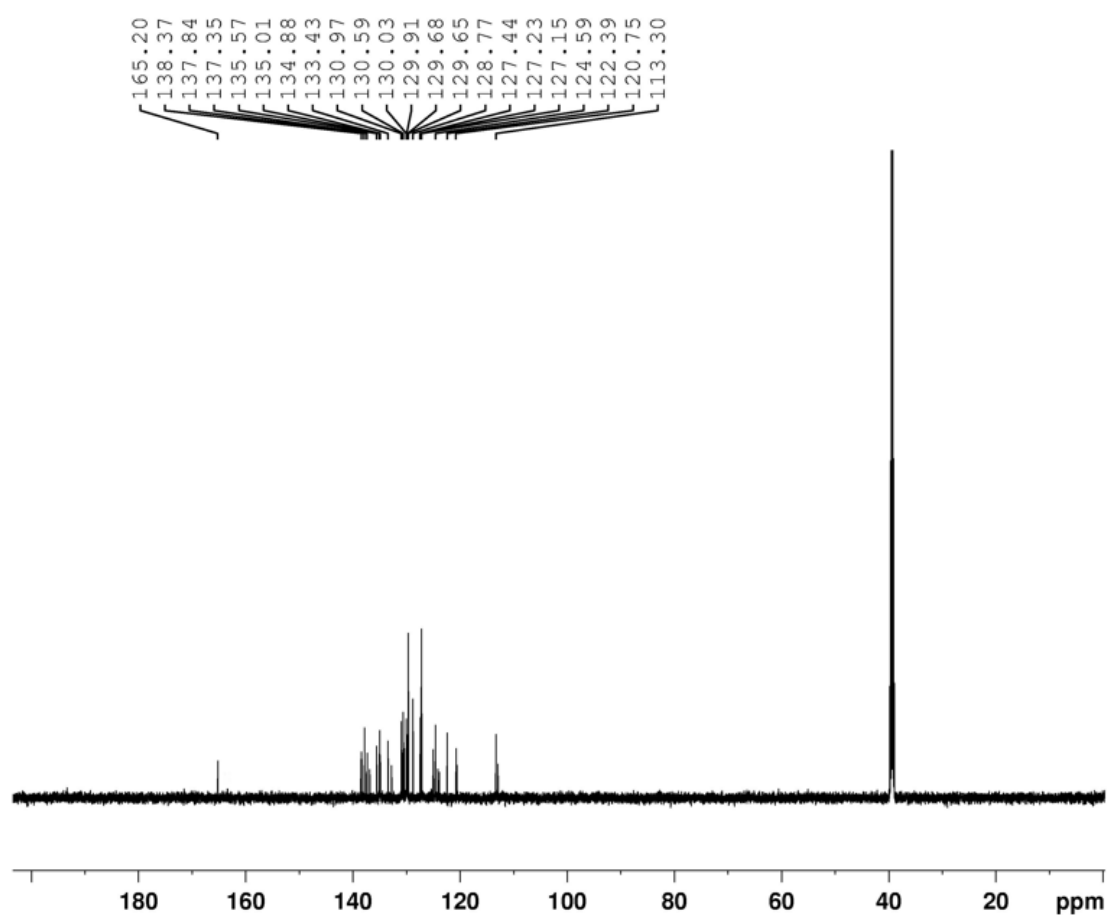

Figure S38. <sup>13</sup>C NMR spectrum of compound A8 (151 MHz, DMSO).

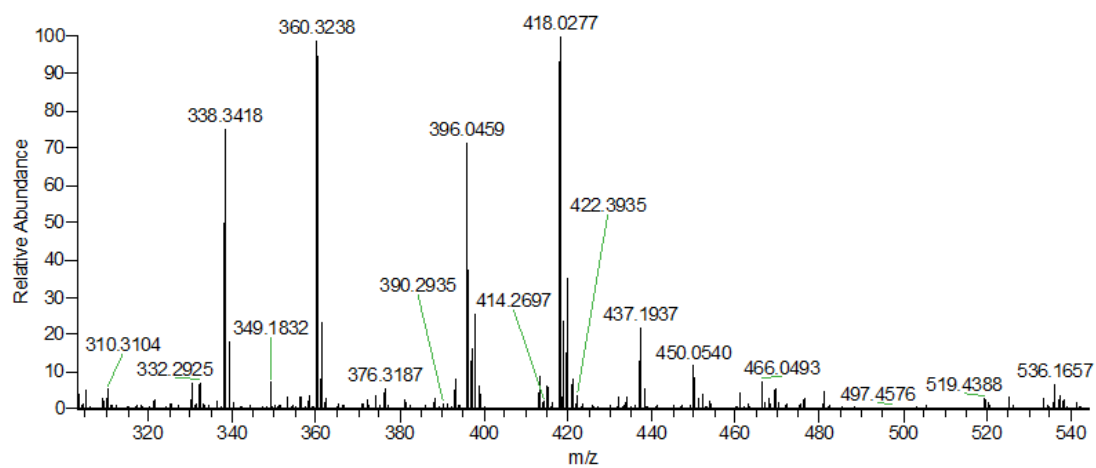

Figure S39. High resolution mass spectrum of compound A8.

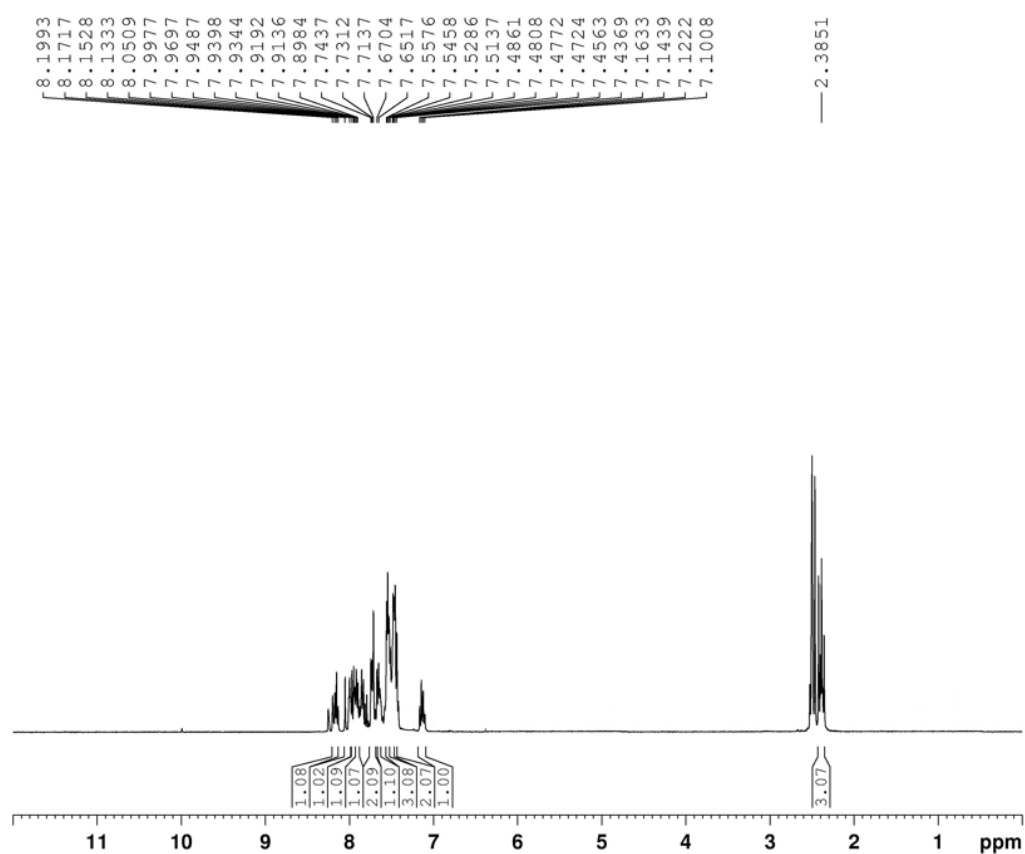

Figure S40. <sup>1</sup>H NMR spectrum of compound A9 (400 MHz, DMSO).

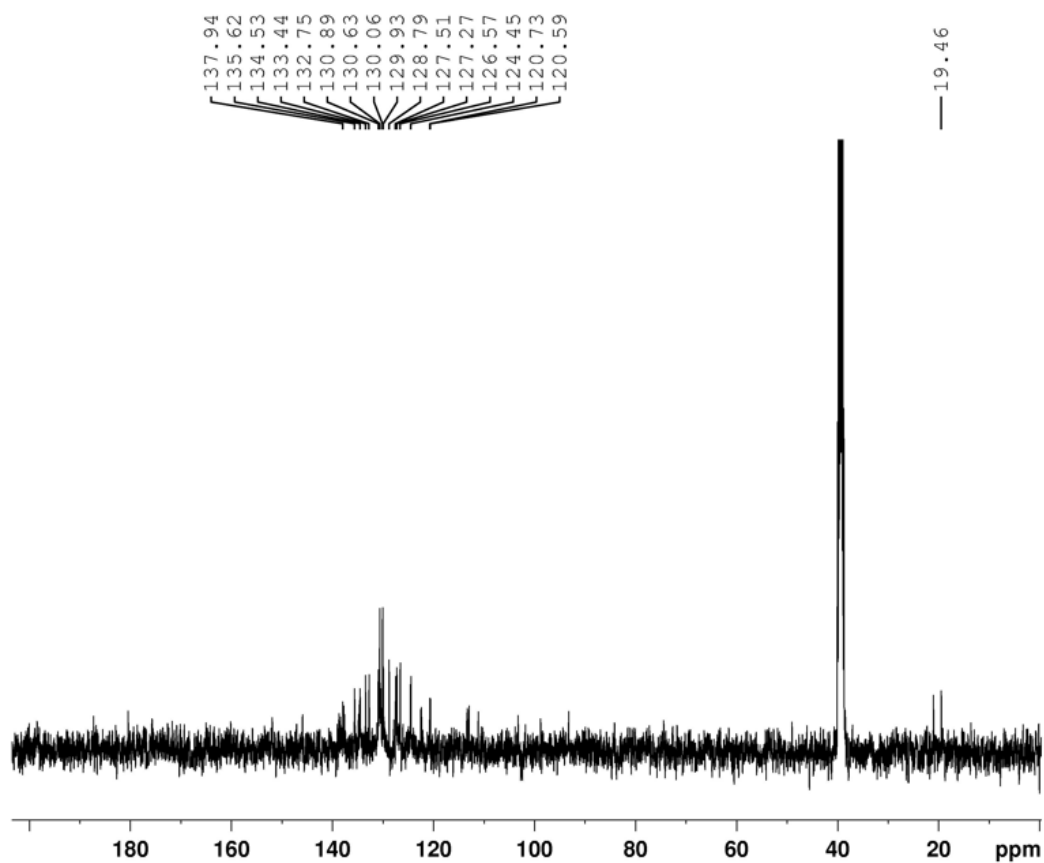

Figure S41. <sup>13</sup>C NMR spectrum of compound A9 (101 MHz, DMSO).

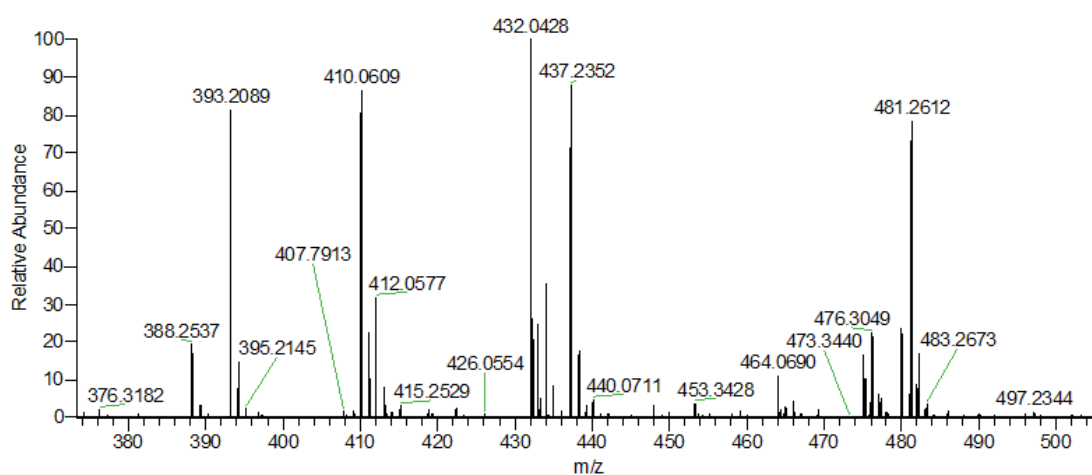

Figure S42. High resolution mass spectrum of compound A9.

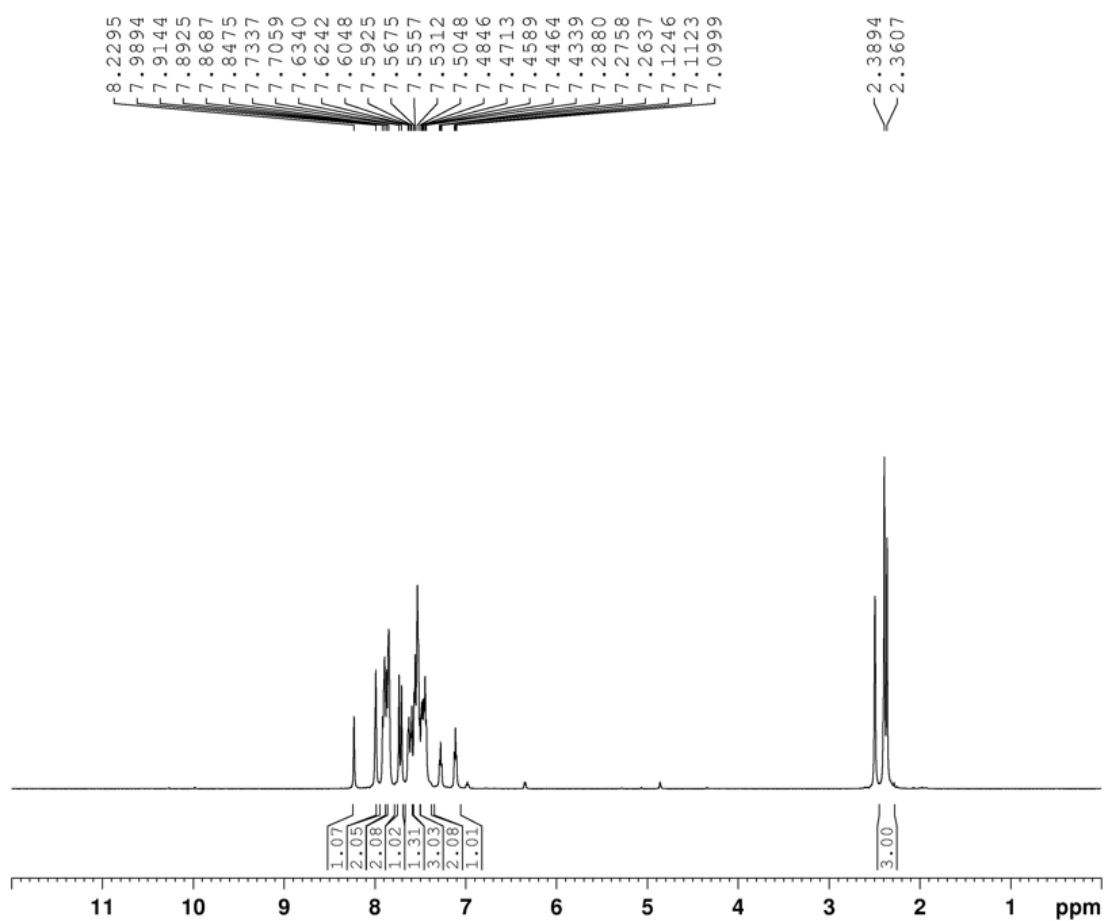

Figure S43. <sup>1</sup>H NMR spectrum of compound A10 (600 MHz, DMSO).

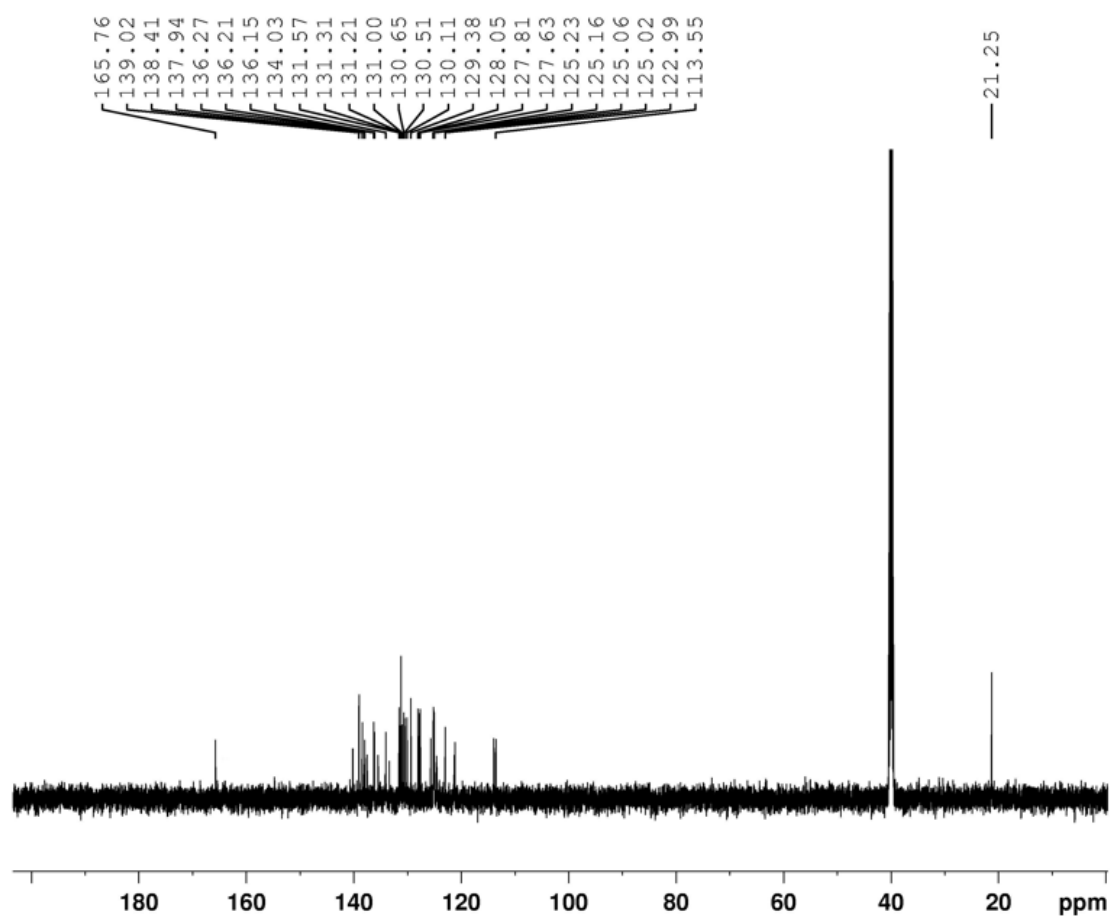

Figure S44.  $^{13}\text{C}$  NMR spectrum of compound A10 (151 MHz, DMSO).

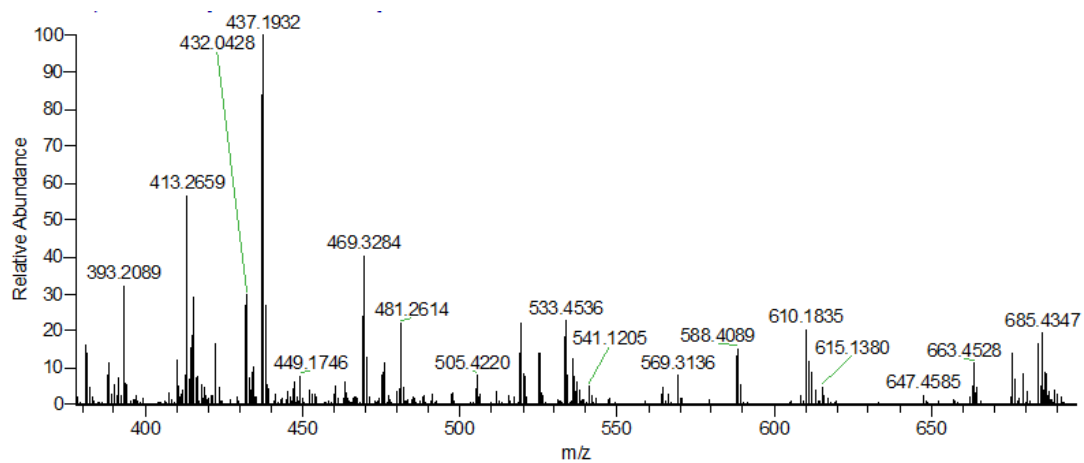

Figure S45. High resolution mass spectrum of compound A10.



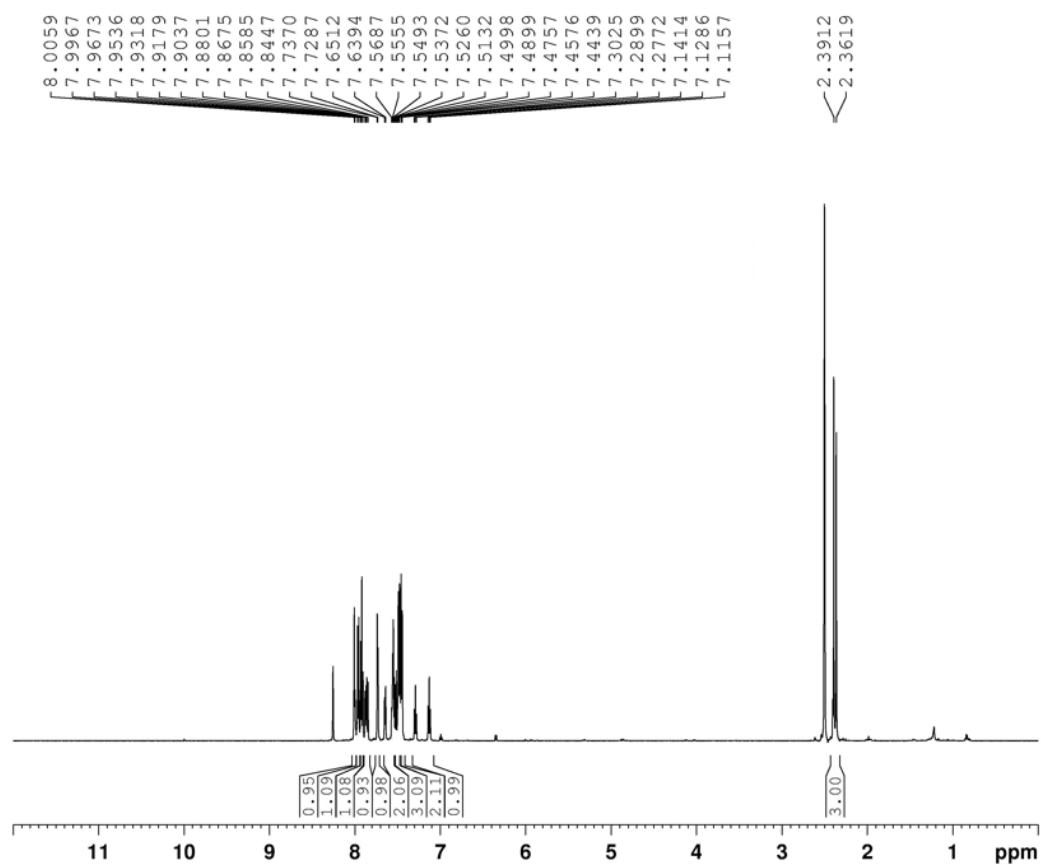

Figure S46. <sup>1</sup>H NMR spectrum of compound A11 (600 MHz, DMSO).

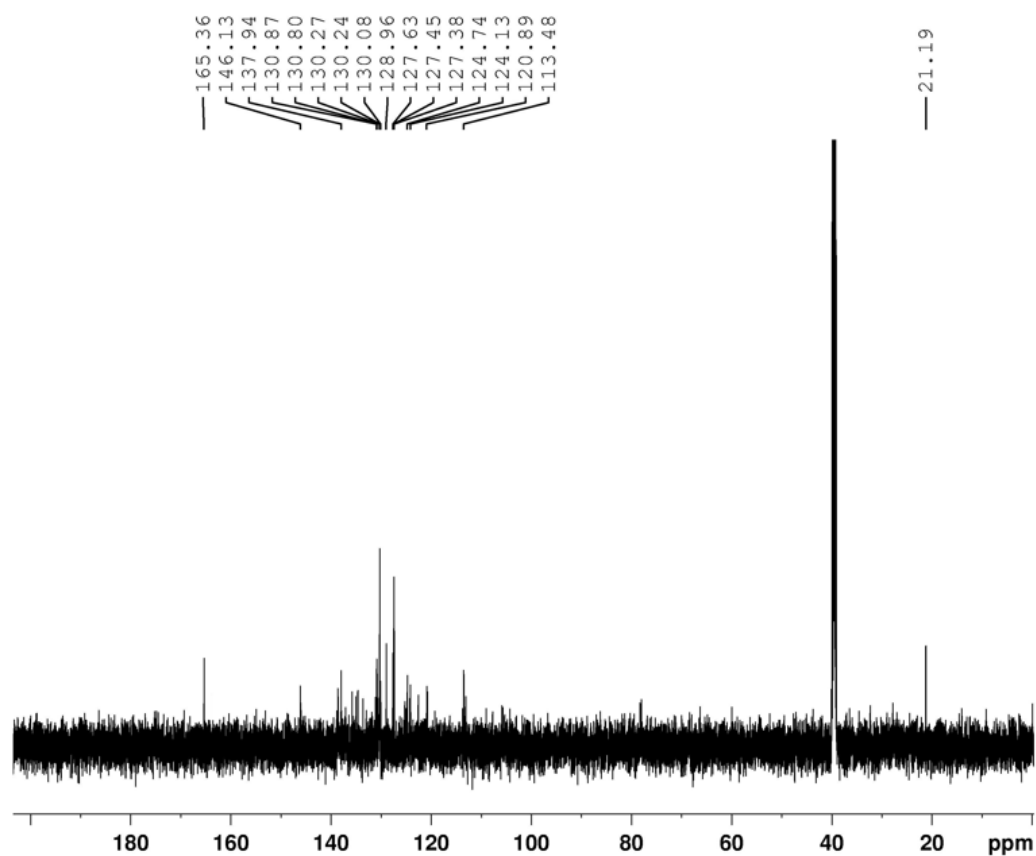

Figure S47. <sup>13</sup>C NMR spectrum of compound A11 (151 MHz, DMSO).

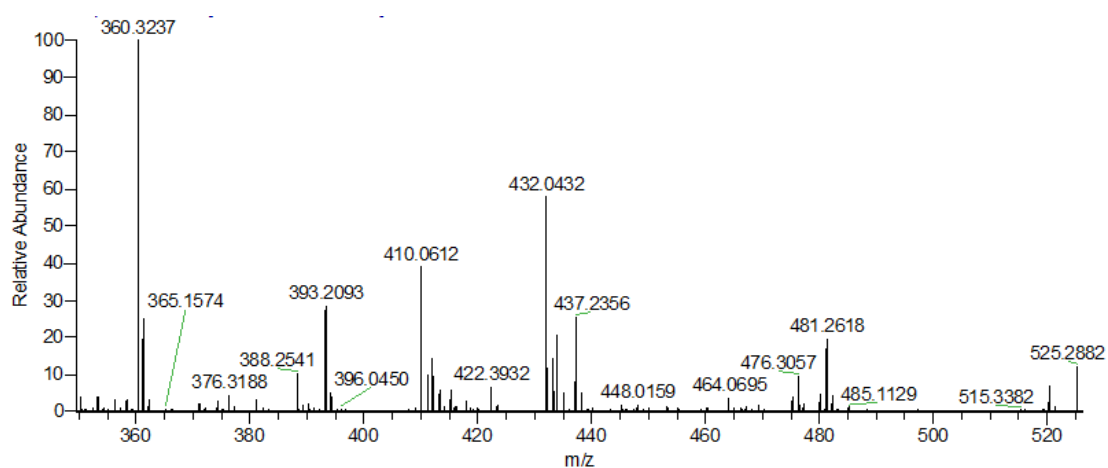

**Figure S48.** High resolution mass spectrum of compound A11.

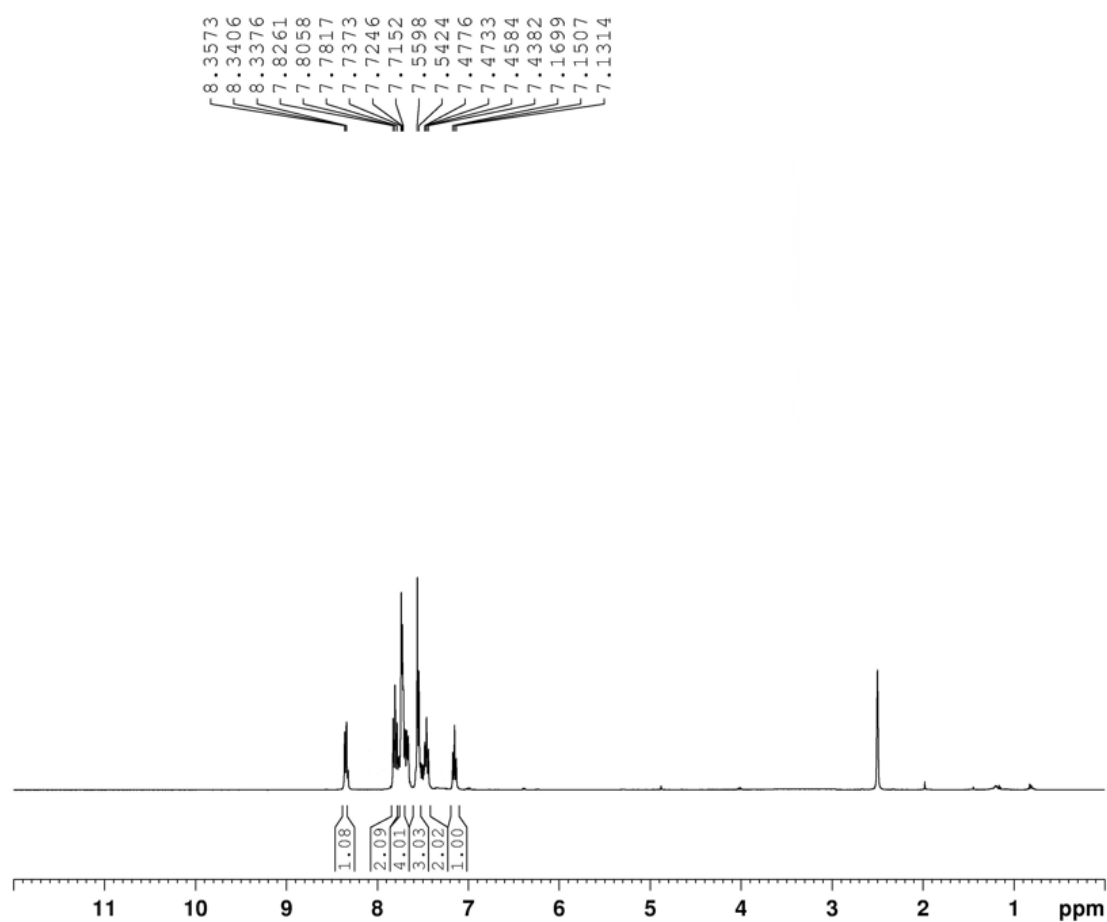

**Figure S49.** <sup>1</sup>H NMR spectrum of compound A12 (400 MHz, DMSO).

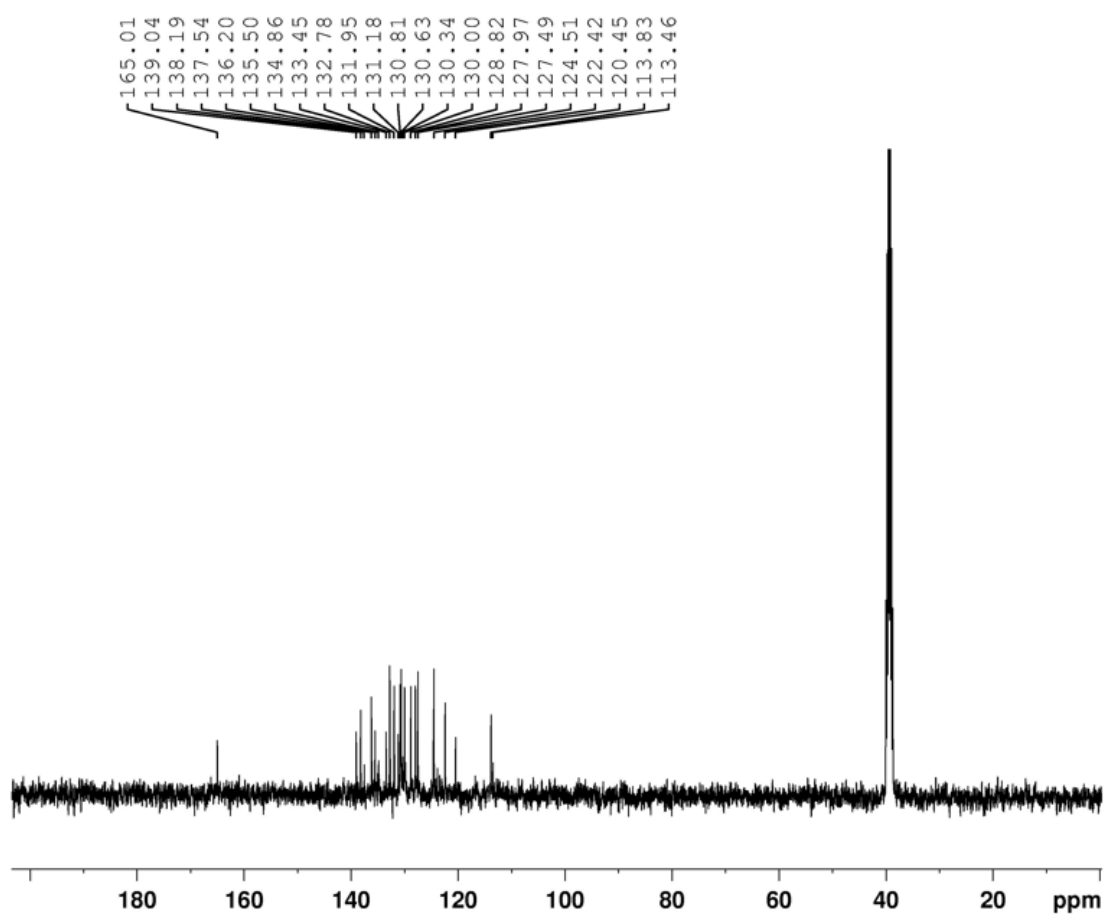

Figure S50. <sup>13</sup>C NMR spectrum of compound A12 (101 MHz, DMSO).

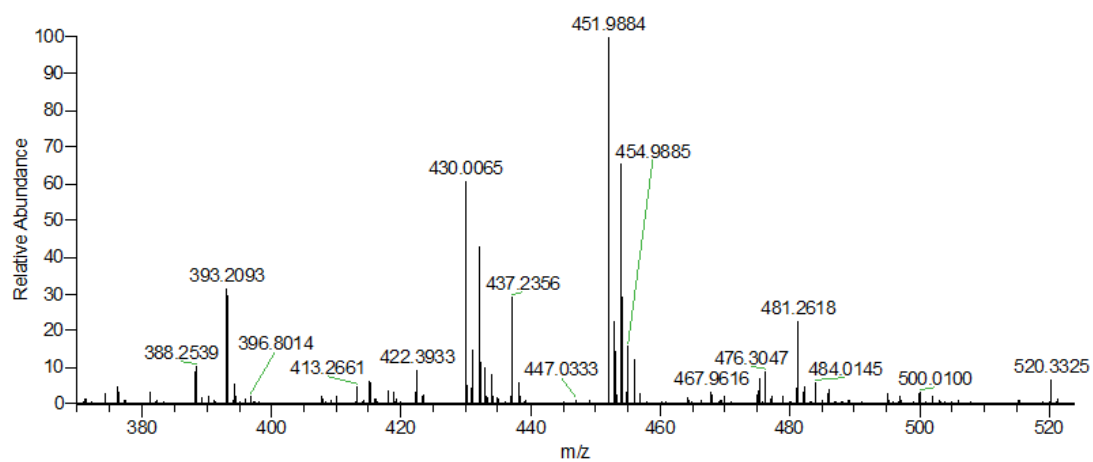

Figure S51. High resolution mass spectrum of compound A12.

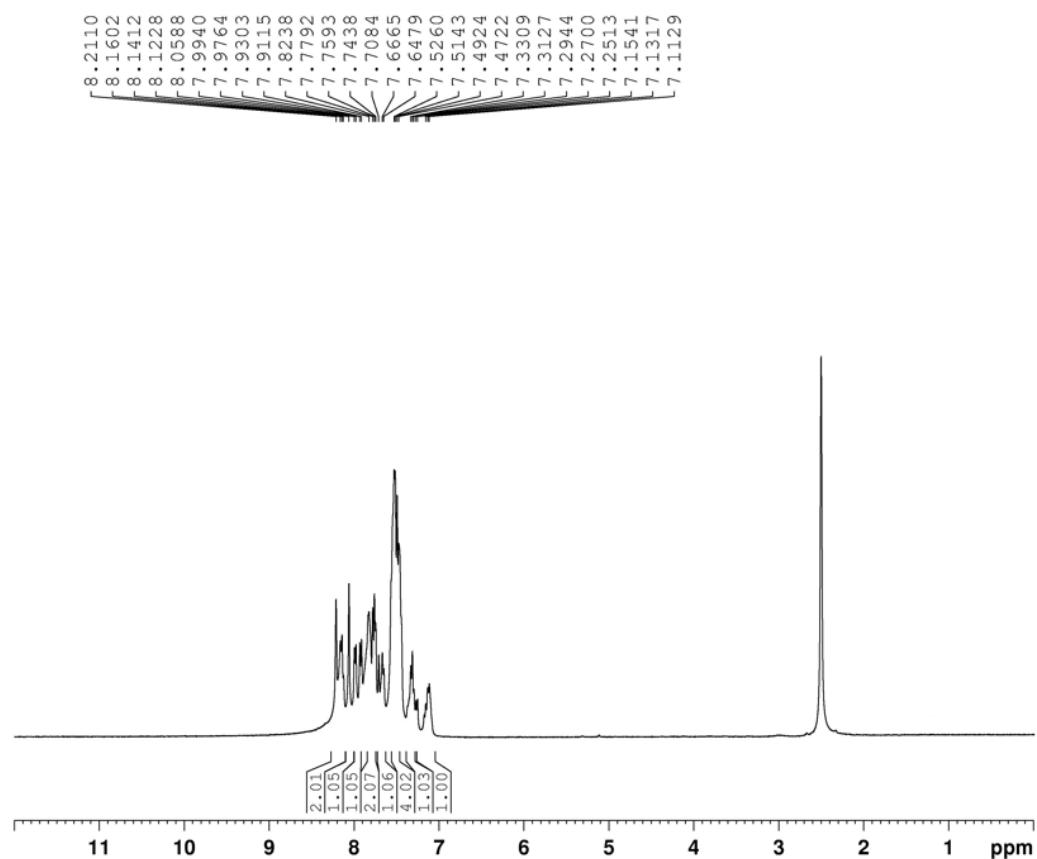

Figure S52. <sup>1</sup>H NMR spectrum of compound A13 (400 MHz, DMSO).

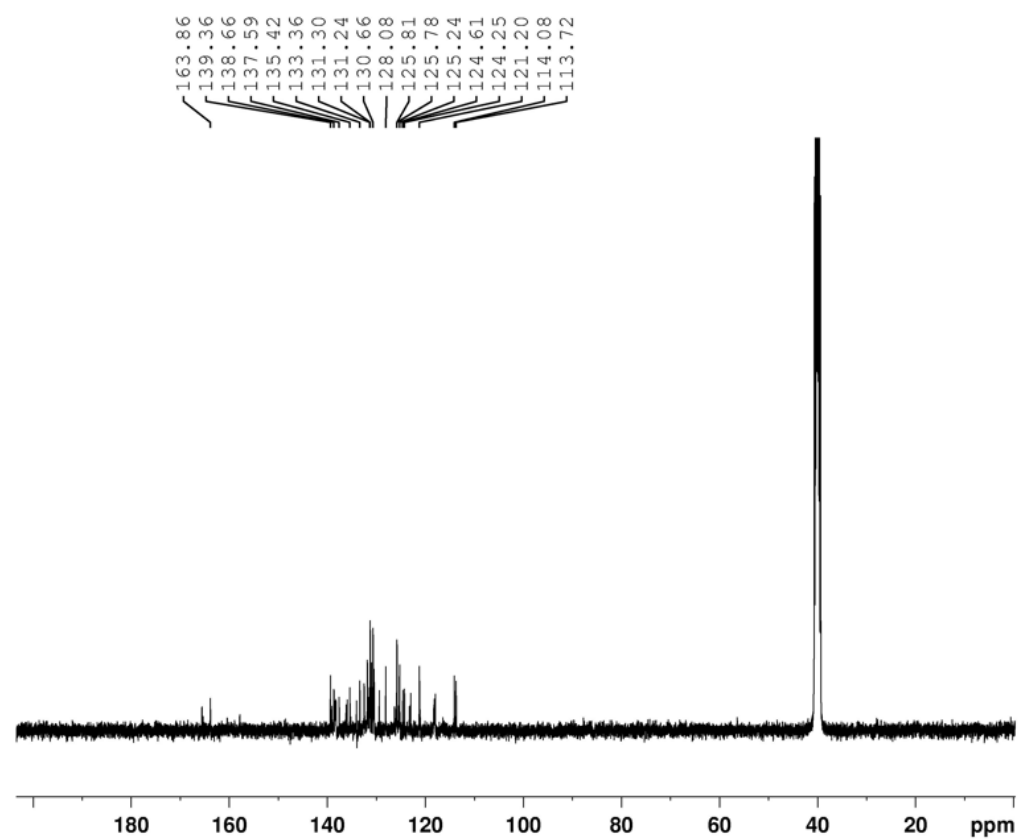

Figure S53. <sup>13</sup>C NMR spectrum of compound A13 (101 MHz, DMSO).

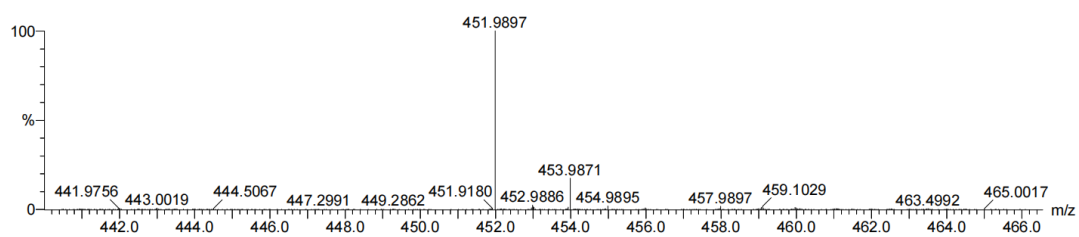

Figure S54. High resolution mass spectrum of compound A13.

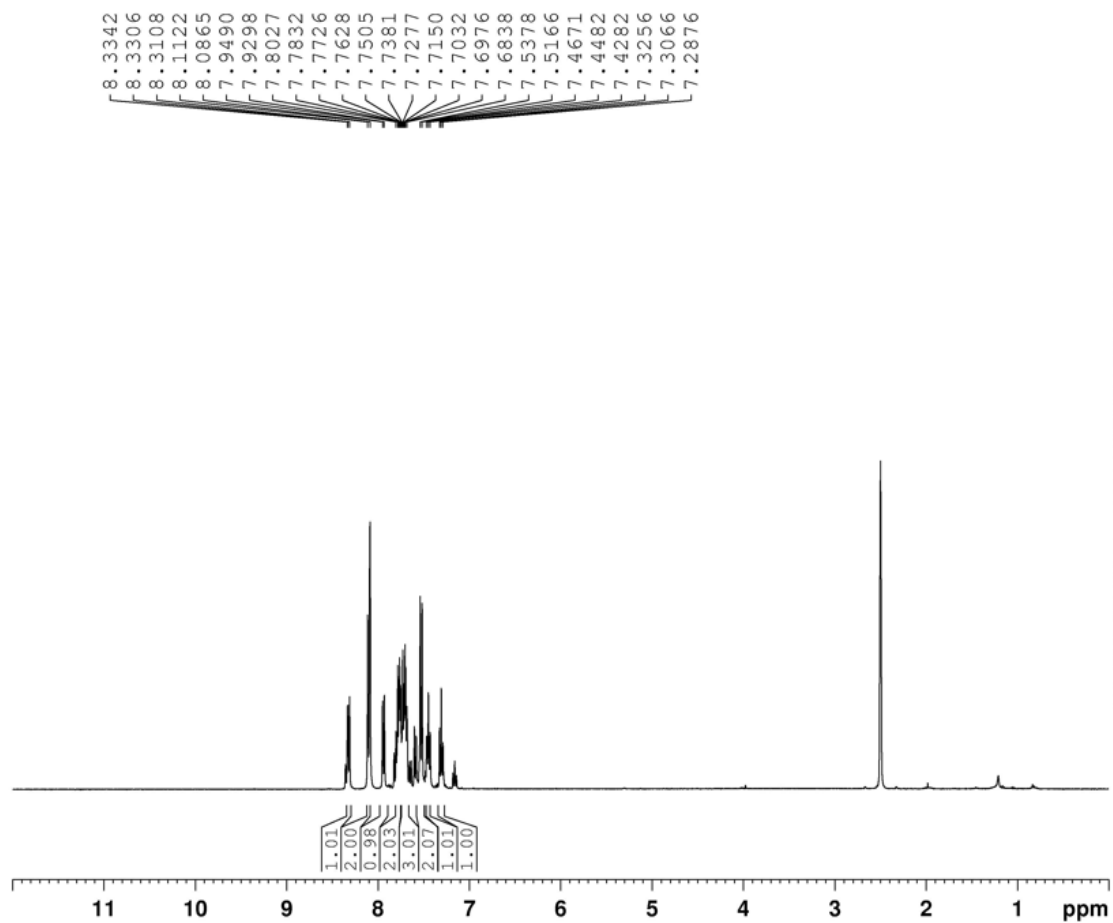

Figure S55. <sup>1</sup>H NMR spectrum of compound A14 (400 MHz, DMSO).

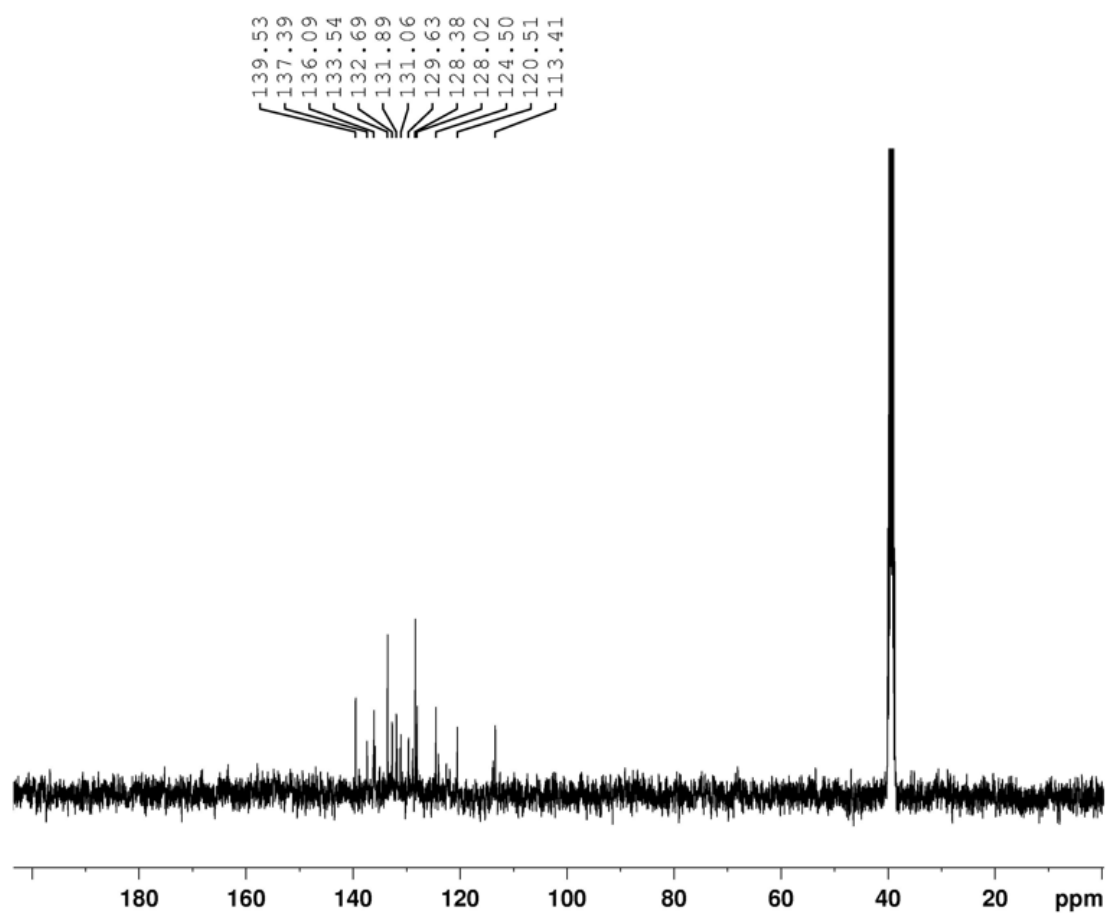

Figure S56.  $^{13}\text{C}$  NMR spectrum of compound A14 (101 MHz, DMSO).

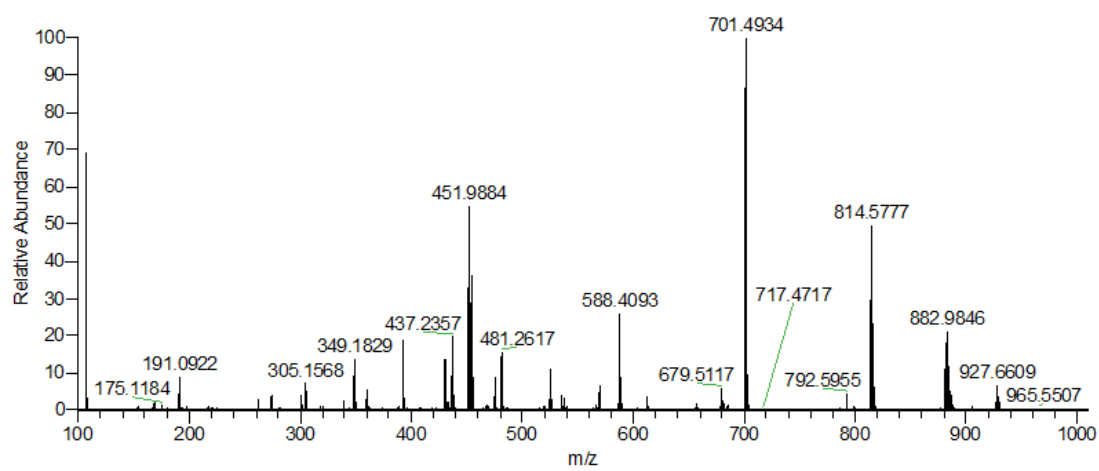

Figure S57. High resolution mass spectrum of compound A14.

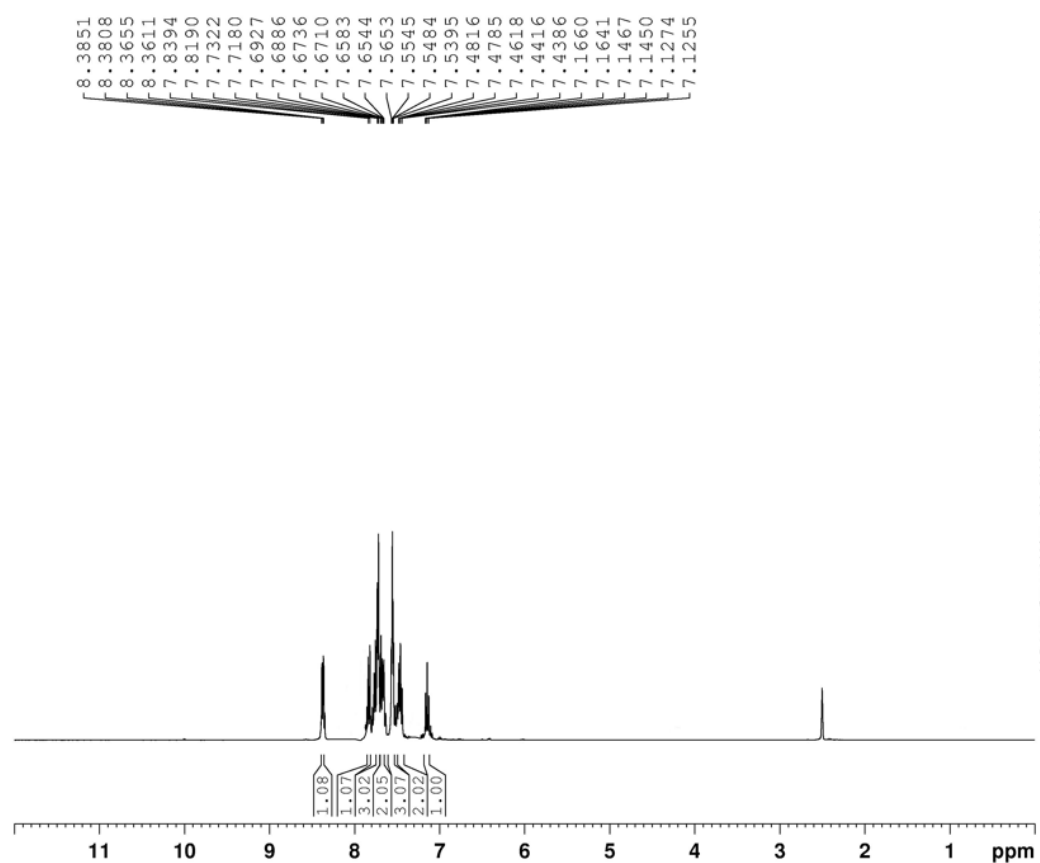

Figure S58. <sup>1</sup>H NMR spectrum of compound A15 (400 MHz, DMSO).

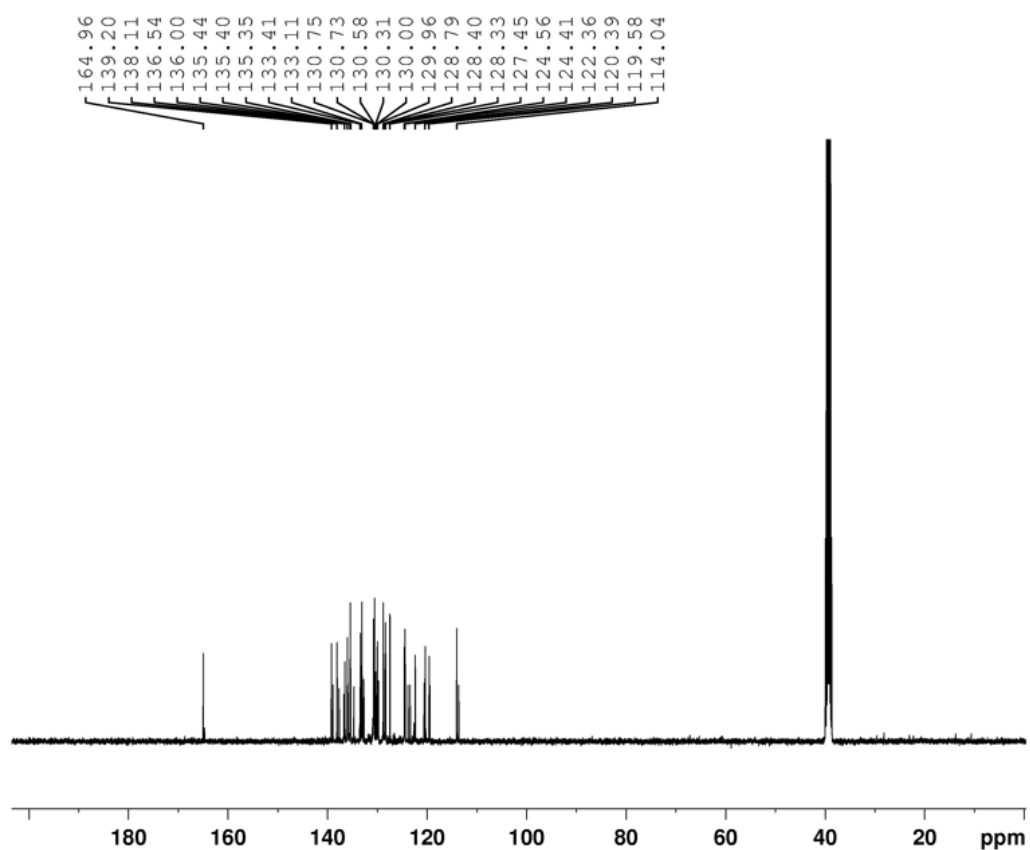

Figure S59. <sup>13</sup>C NMR spectrum of compound A15 (101 MHz, DMSO).

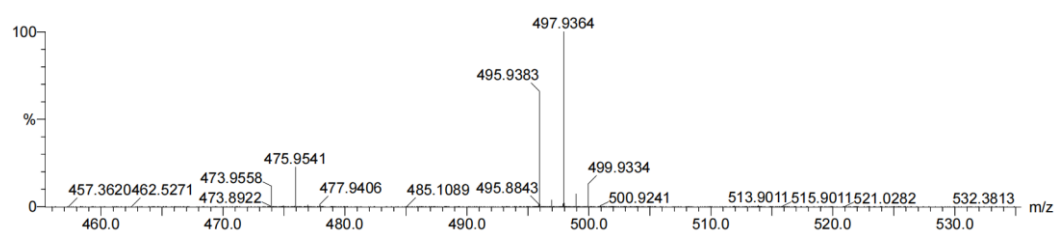

Figure S60. High resolution mass spectrum of compound A15.

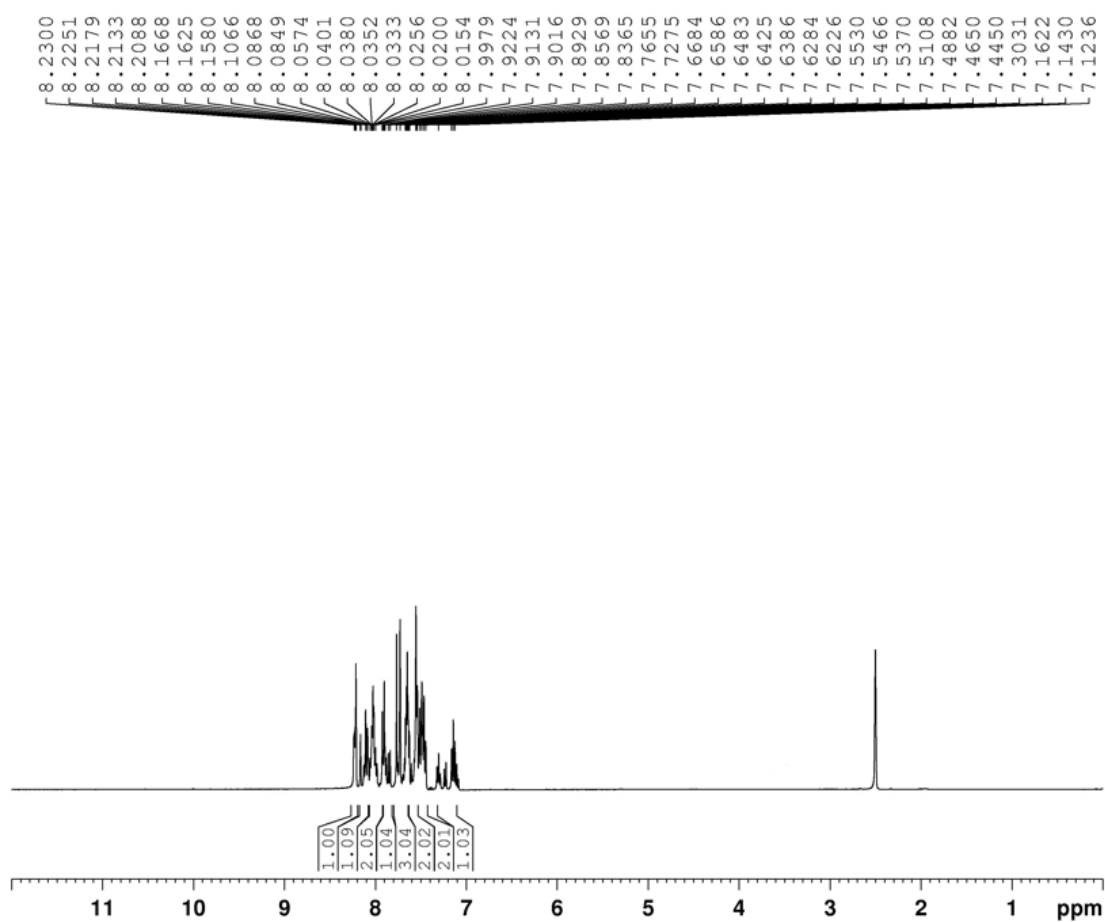

Figure S61. <sup>1</sup>H NMR spectrum of compound A16 (400 MHz, DMSO).



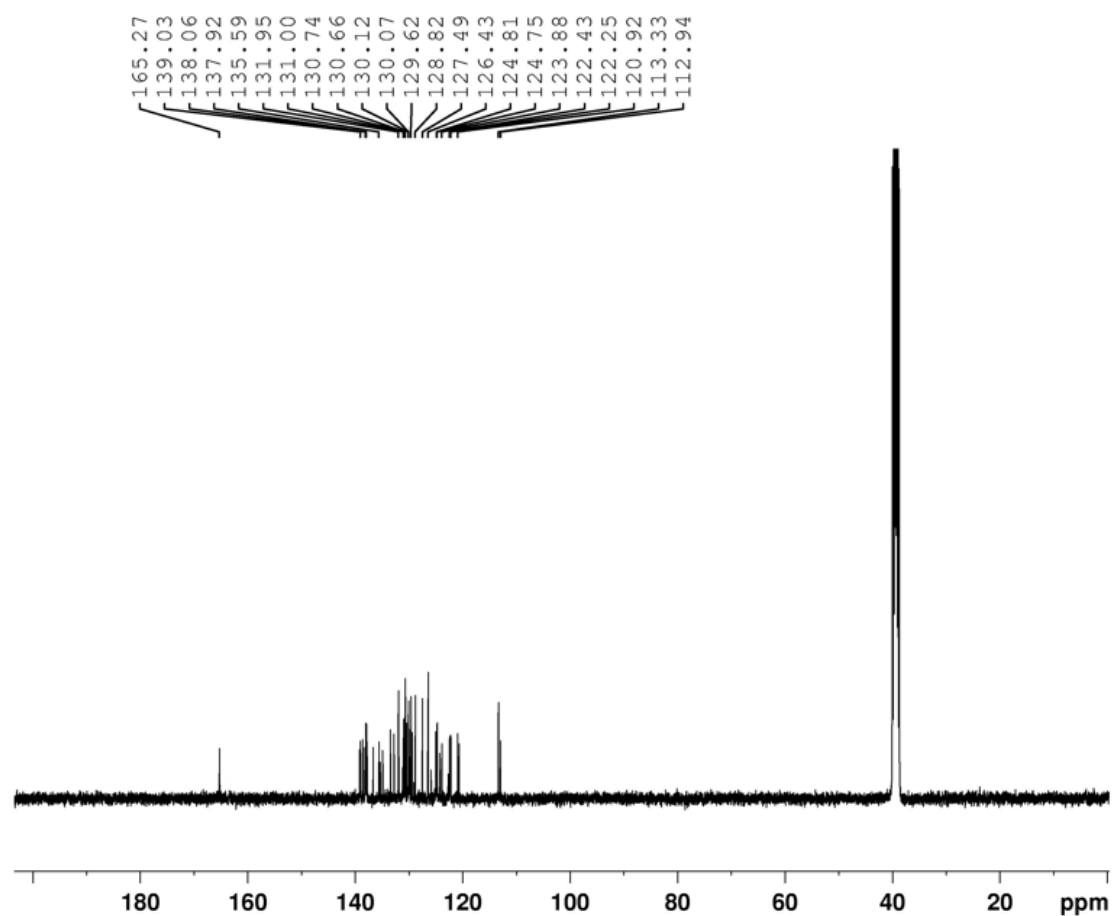

Figure S62. <sup>13</sup>C NMR spectrum of compound A16 (101 MHz, DMSO).

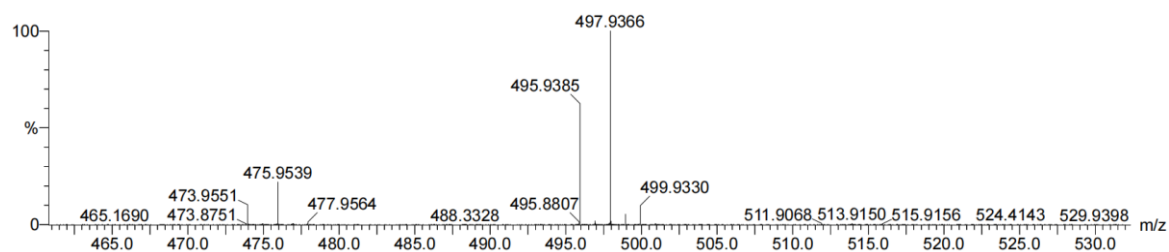

Figure S63. High resolution mass spectrum of compound A16.

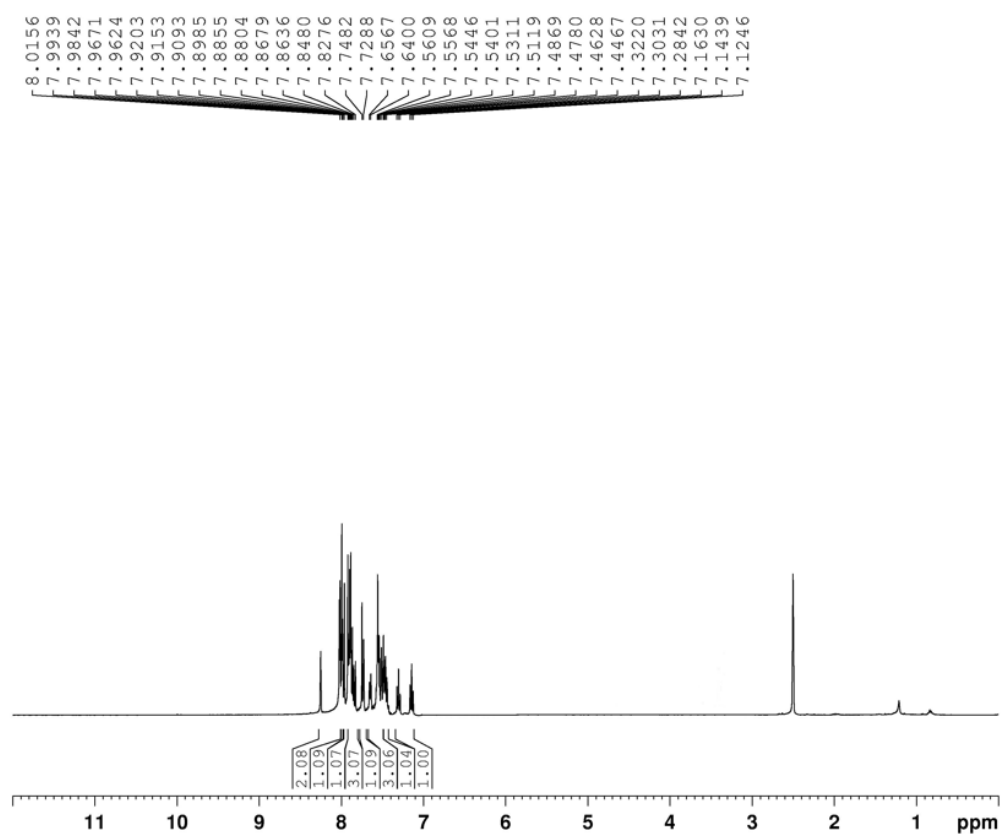

Figure S64. <sup>1</sup>H NMR spectrum of compound A17 (400 MHz, DMSO).

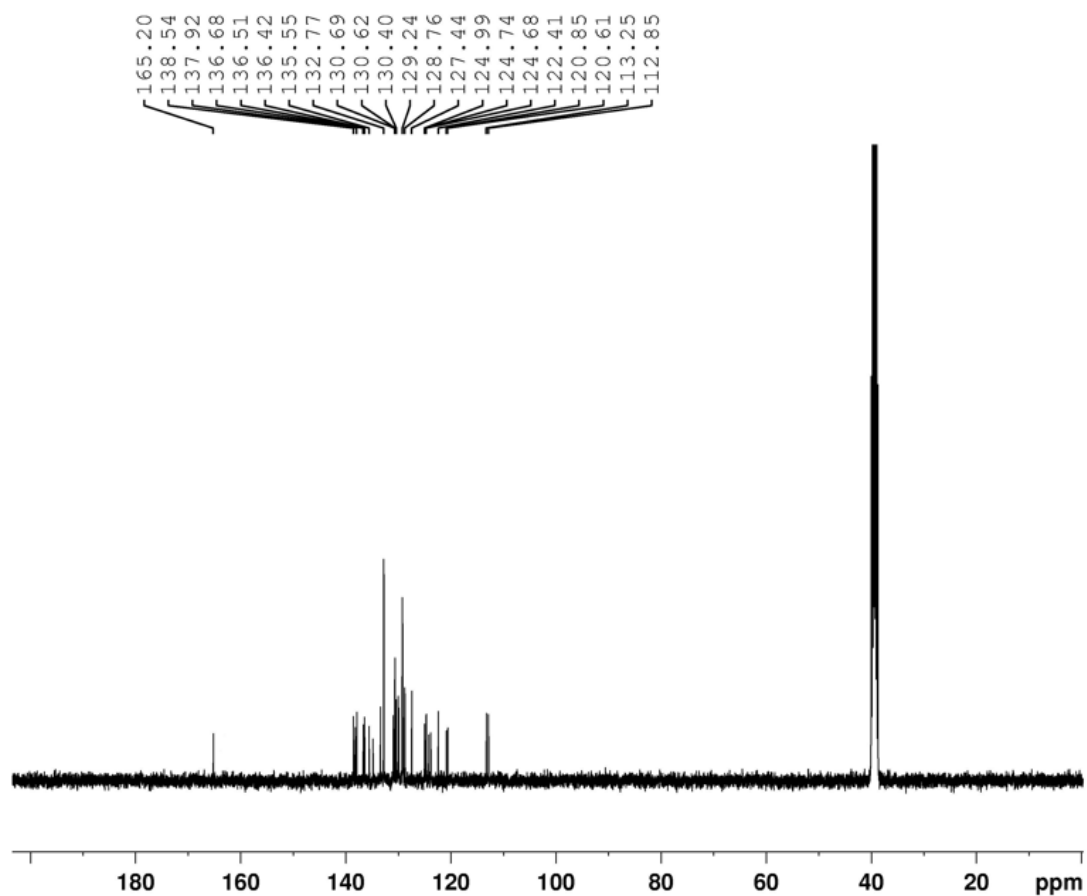

Figure S65. <sup>13</sup>C NMR spectrum of compound A17 (101 MHz, DMSO).

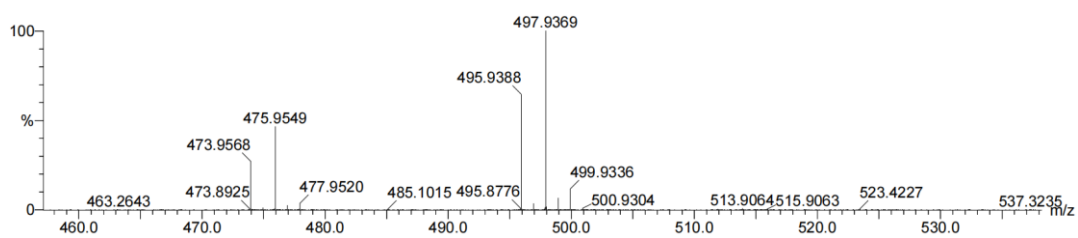

Figure S66. High resolution mass spectrum of compound A17.

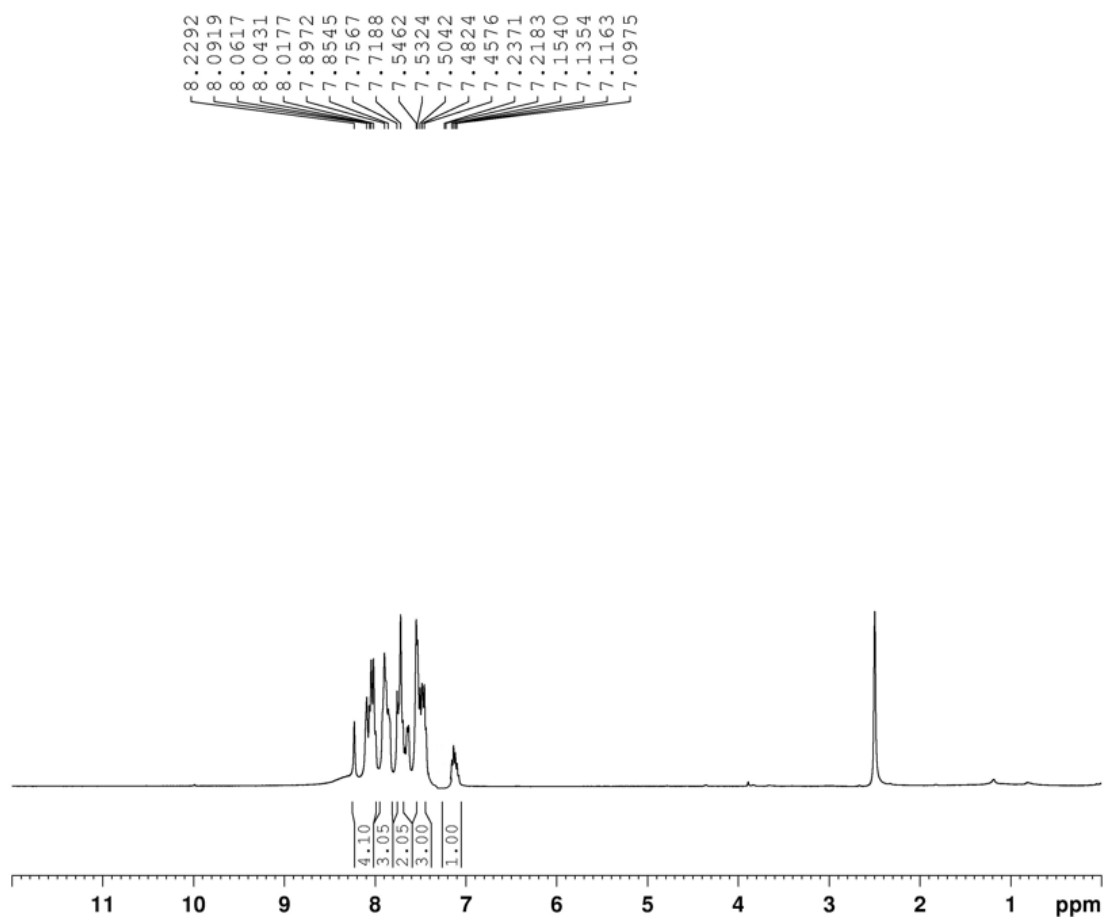

Figure S67. <sup>1</sup>H NMR spectrum of compound A18 (400 MHz, DMSO).

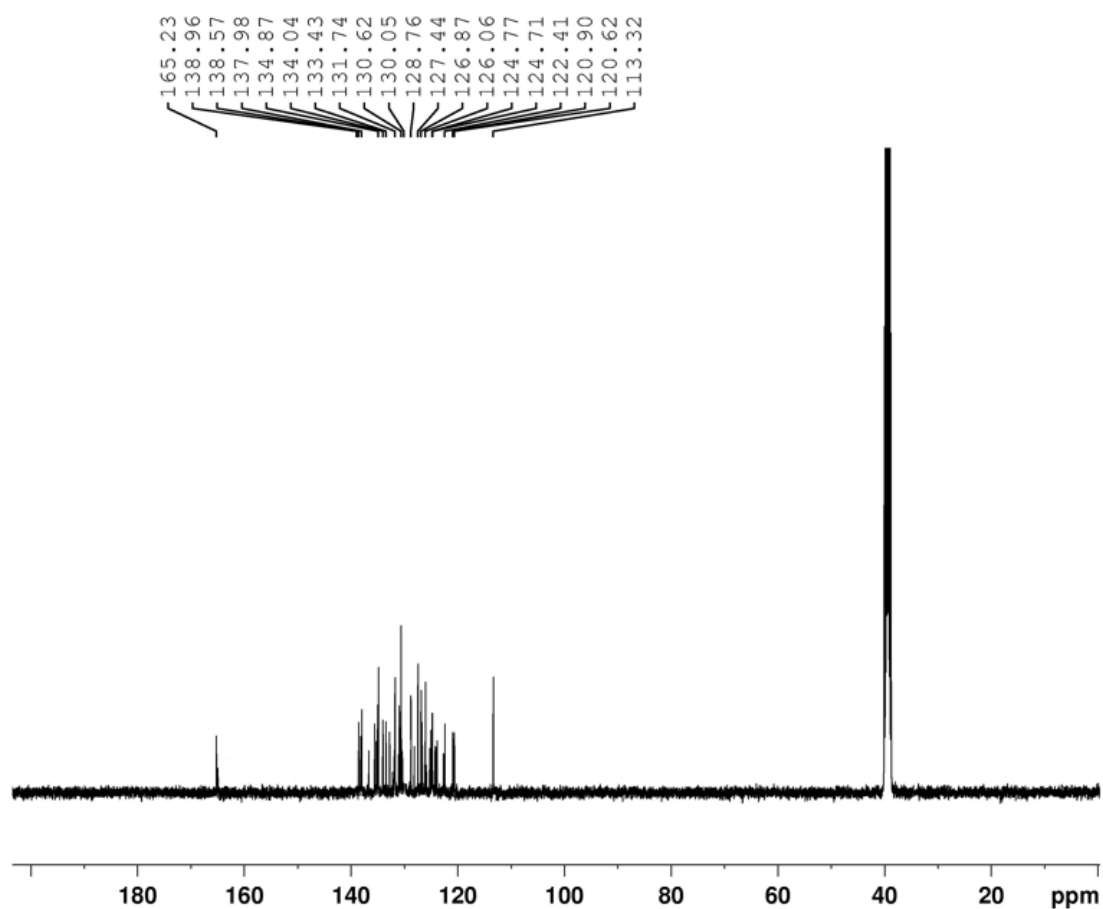

Figure S68. <sup>13</sup>C NMR spectrum of compound A18 (101 MHz, DMSO).

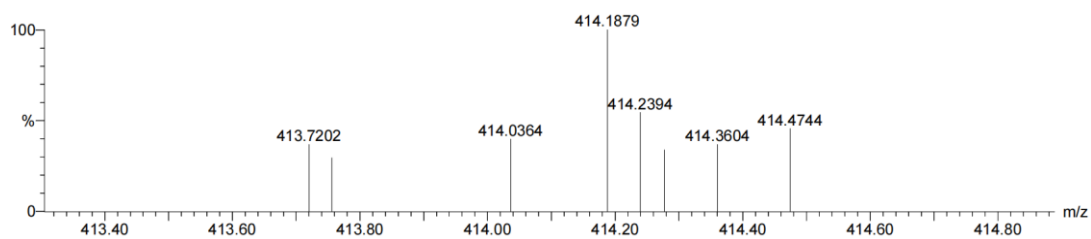

Figure S69. High resolution mass spectrum of compound A18.

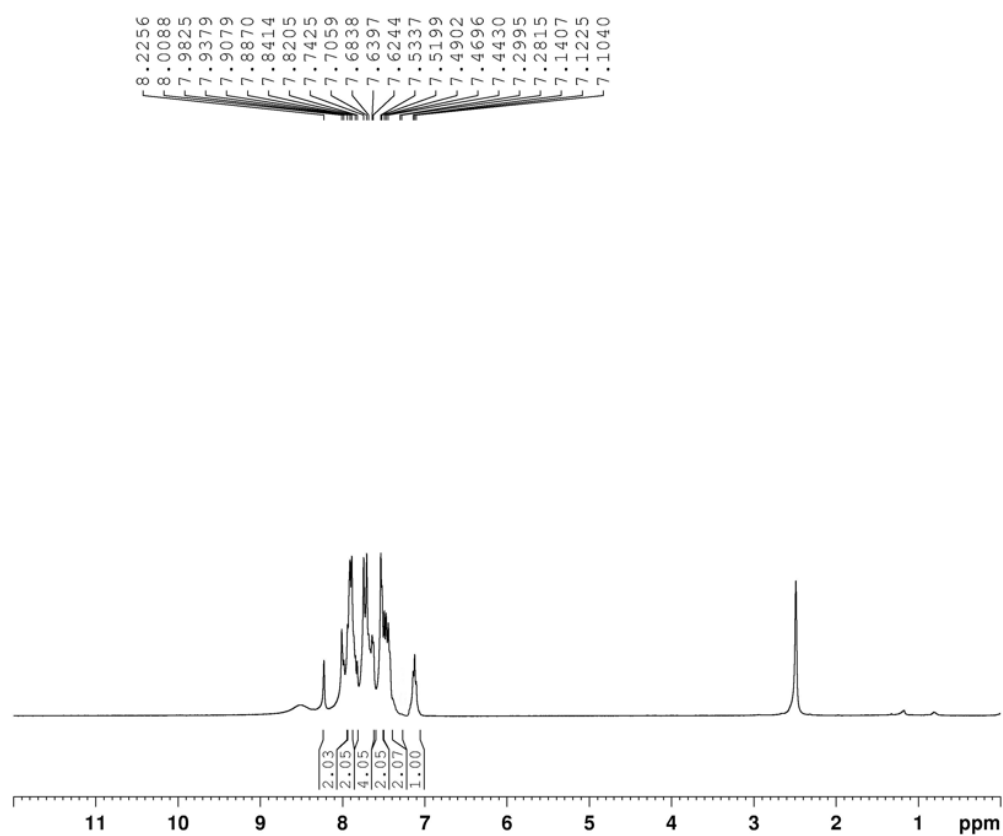

Figure S70. <sup>1</sup>H NMR spectrum of compound A19 (400 MHz, DMSO).

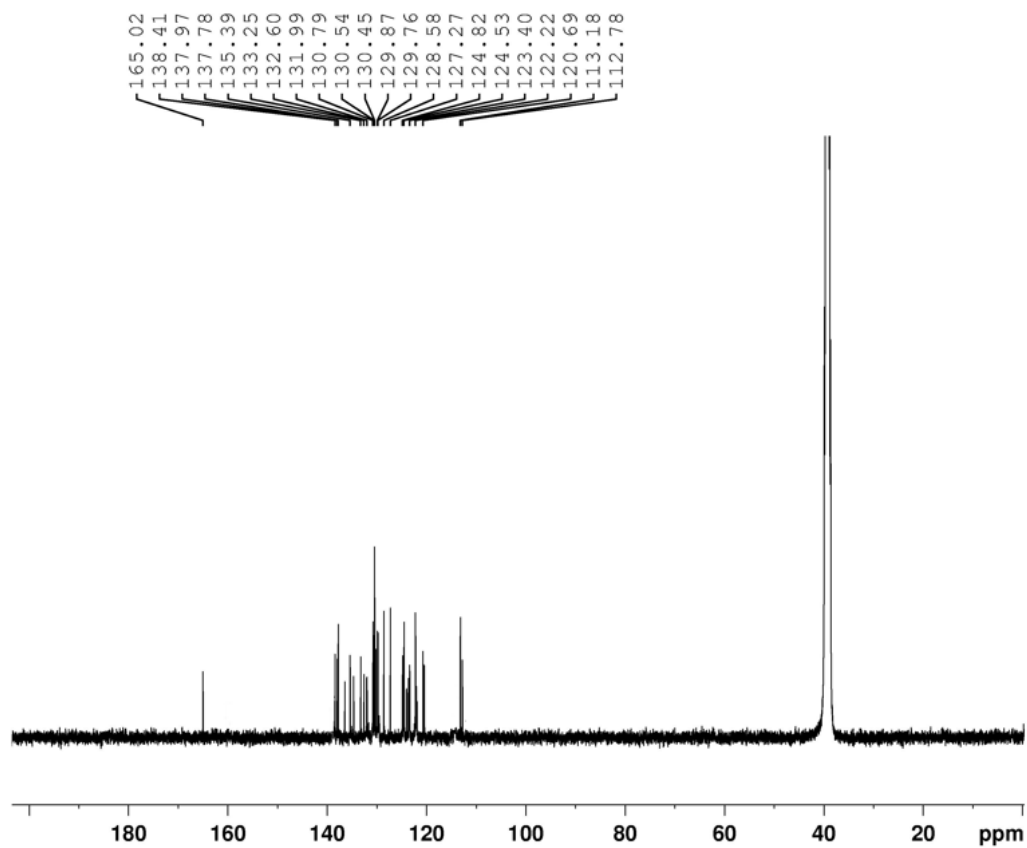

Figure S71. <sup>13</sup>C NMR spectrum of compound A19 (101 MHz, DMSO).

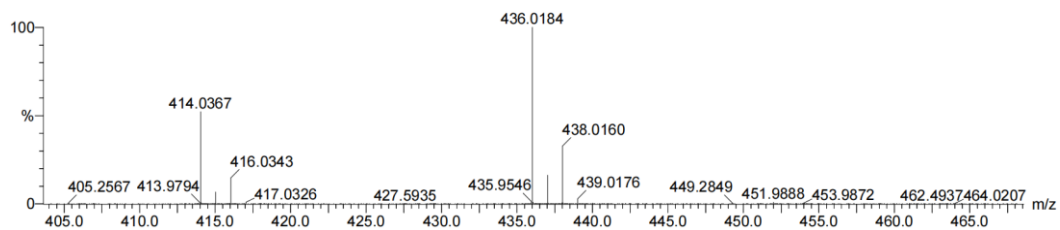

Figure S72. High resolution mass spectrum of compound A19.

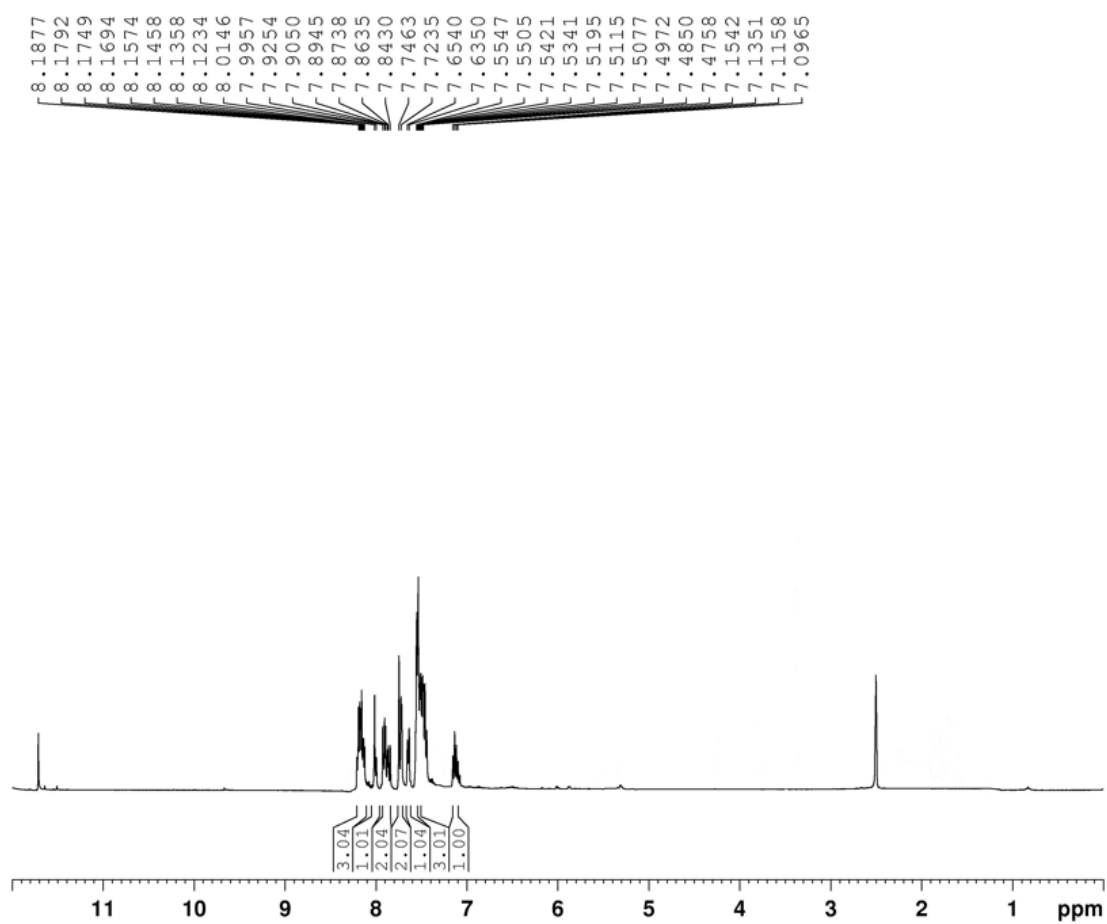

Figure S73. <sup>1</sup>H NMR spectrum of compound A20 (400 MHz, DMSO).

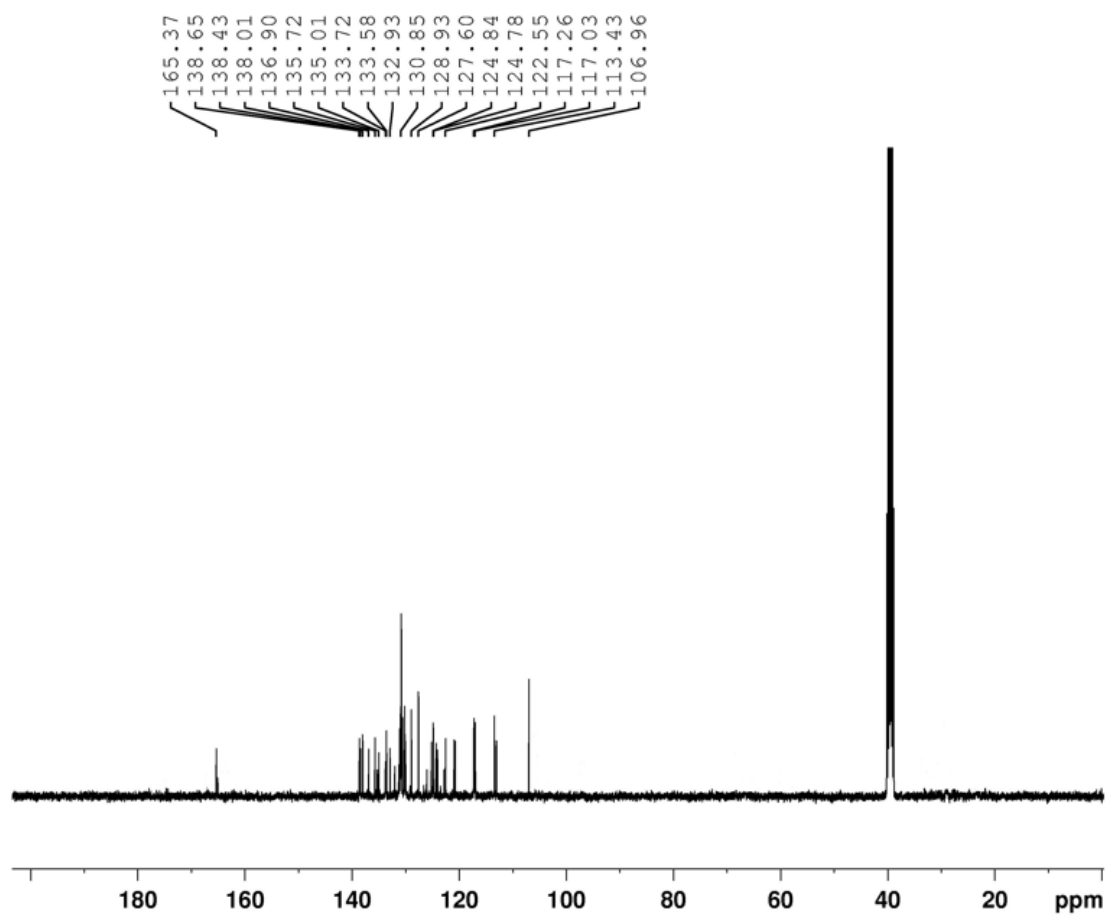

Figure S74.  $^{13}\text{C}$  NMR spectrum of compound A20 (101 MHz, DMSO).

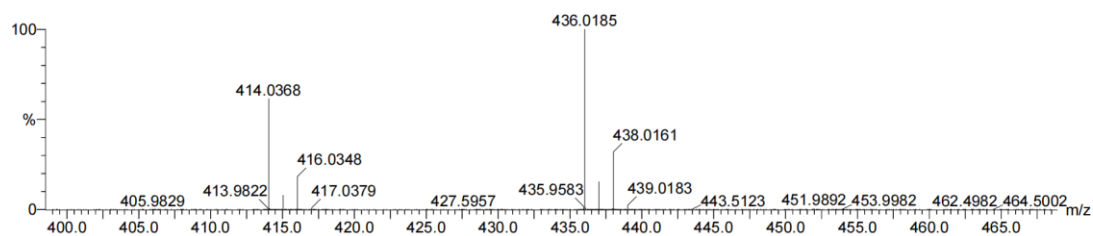

Figure S75. High resolution mass spectrum of compound A20.

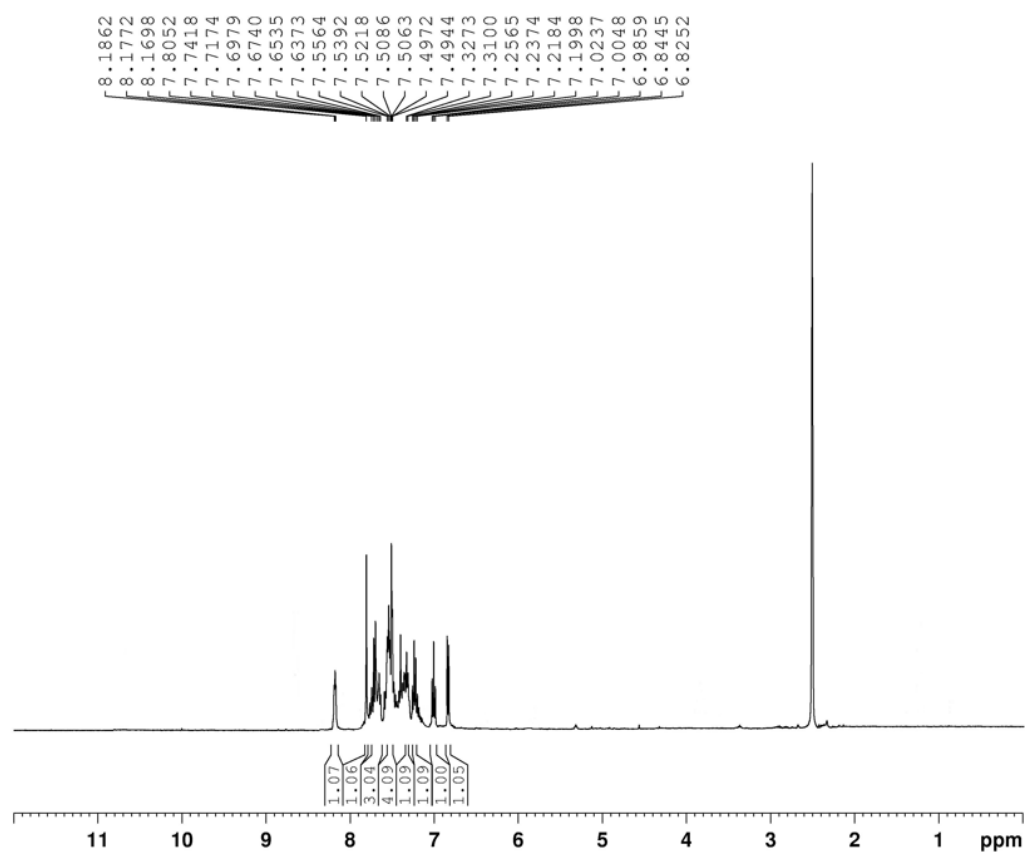

Figure S76. <sup>1</sup>H NMR spectrum of compound A21 (400 MHz, DMSO).

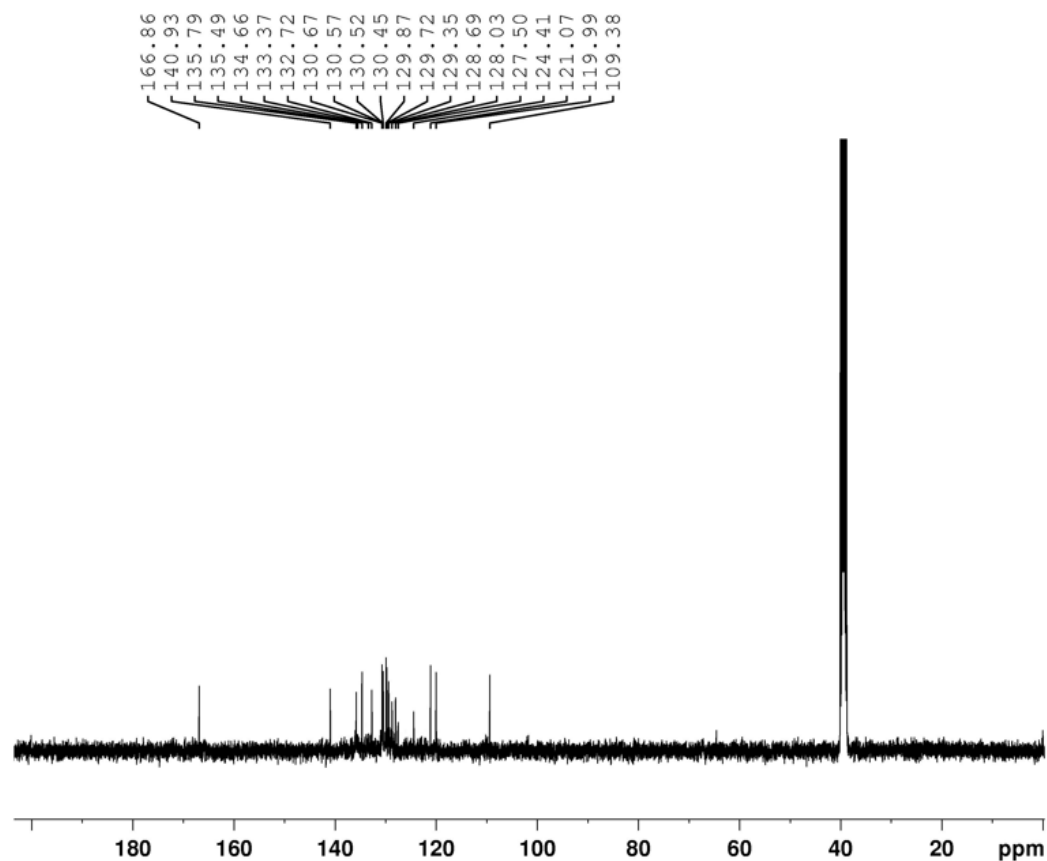

Figure S77. <sup>13</sup>C NMR spectrum of compound A21 (101 MHz, DMSO).



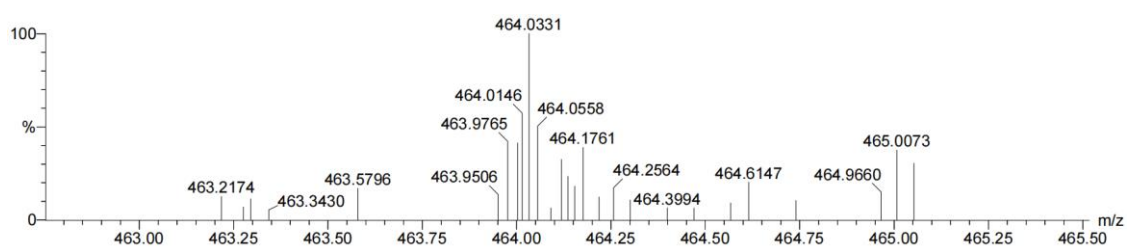

Figure S78. High resolution mass spectrum of compound A21.

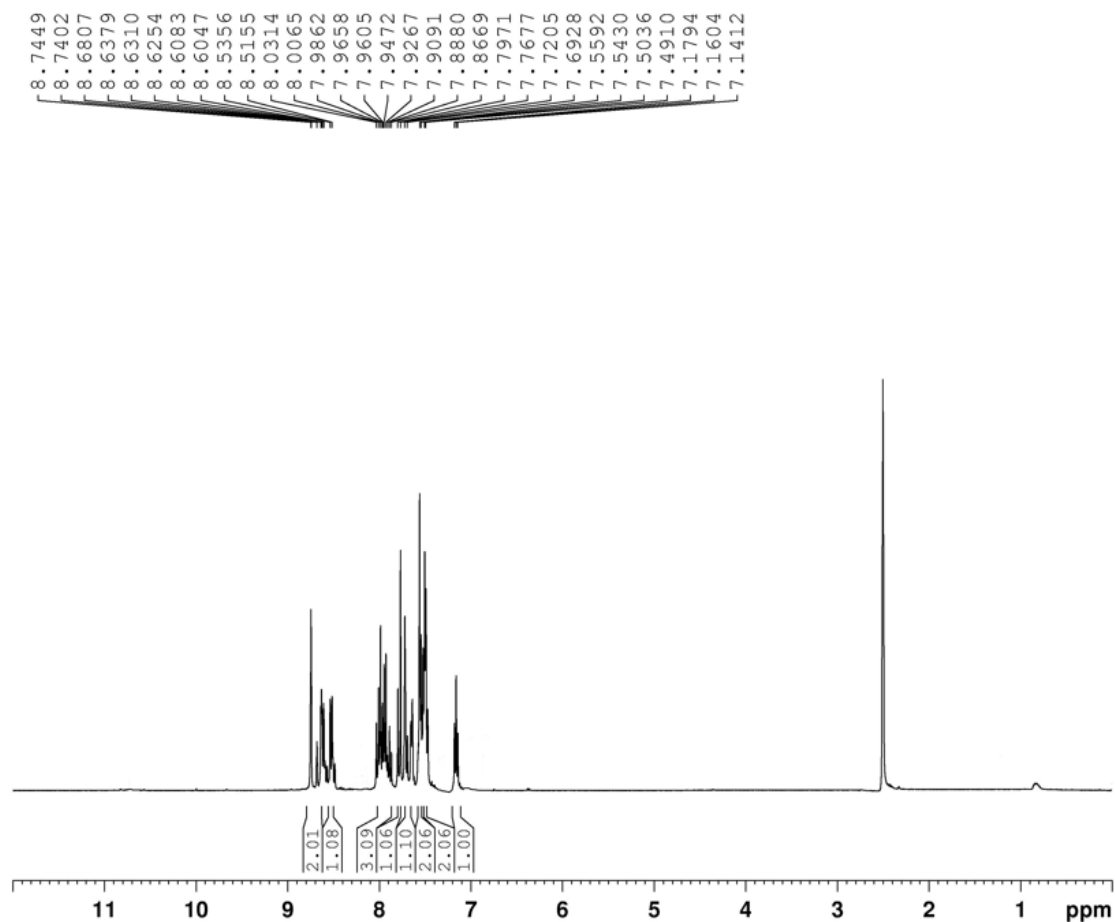

Figure S79. <sup>1</sup>H NMR spectrum of compound A22 (400 MHz, DMSO).

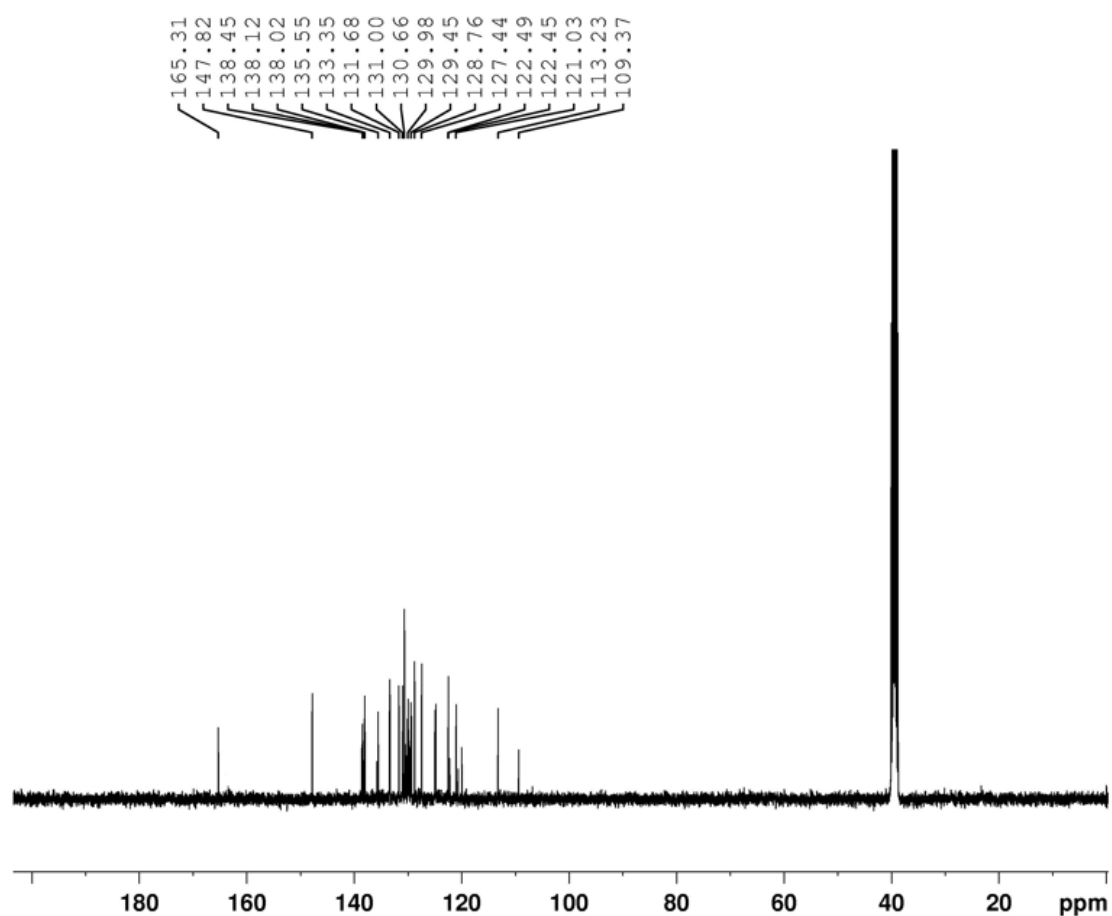

Figure S80.  $^{13}\text{C}$  NMR spectrum of compound A22 (101 MHz, DMSO).

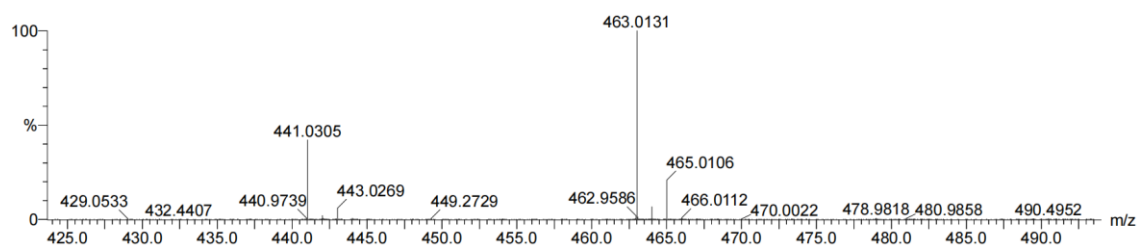

Figure S81. High resolution mass spectrum of compound A22.

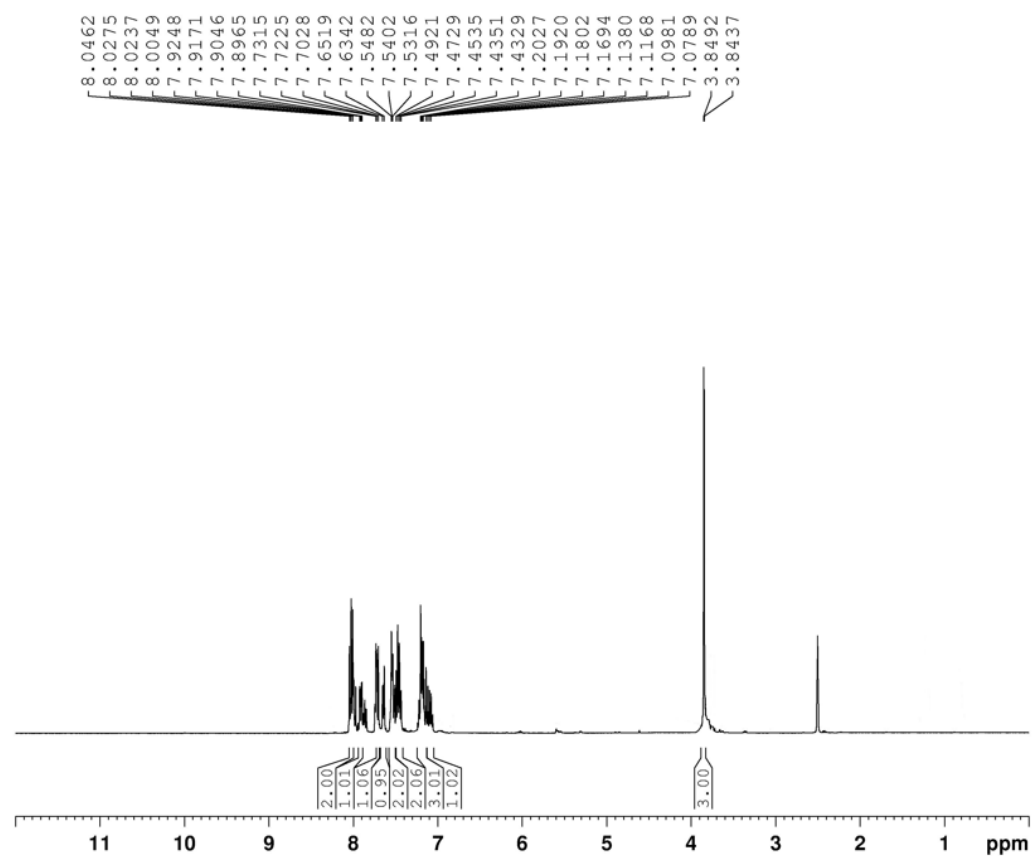

Figure S82. <sup>1</sup>H NMR spectrum of compound A23 (400 MHz, DMSO).

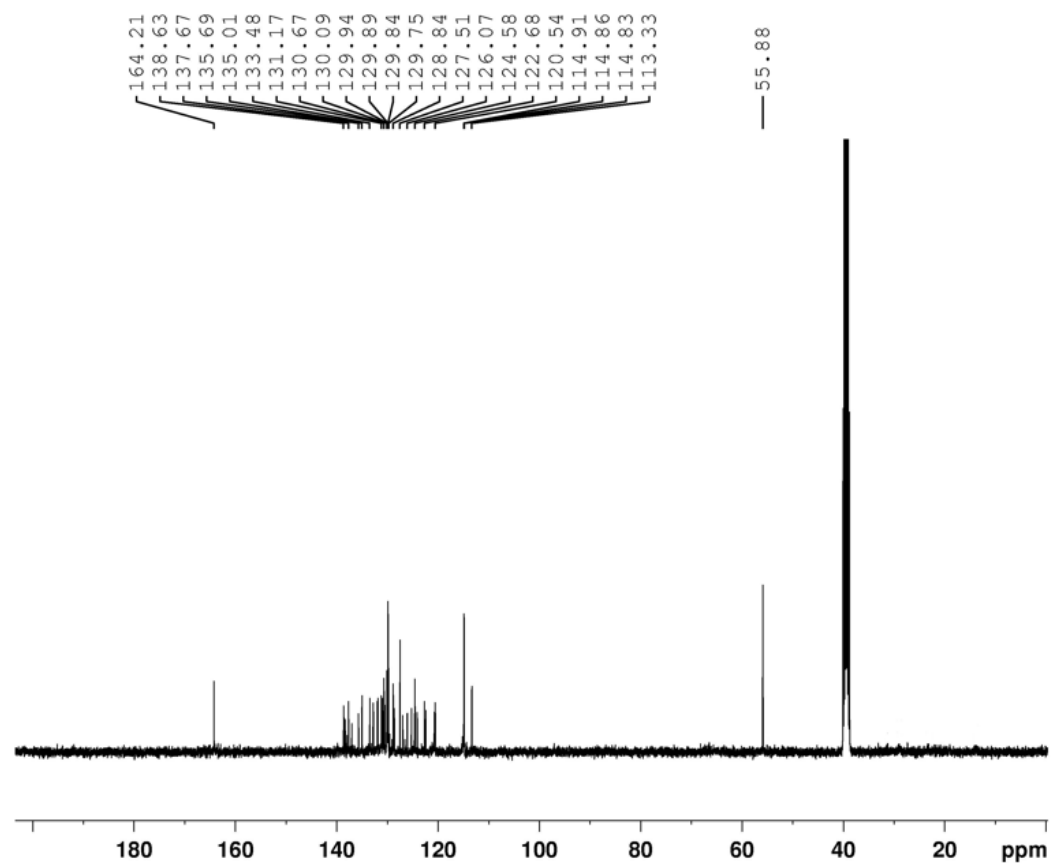

Figure S83. <sup>13</sup>C NMR spectrum of compound A23 (101 MHz, DMSO).

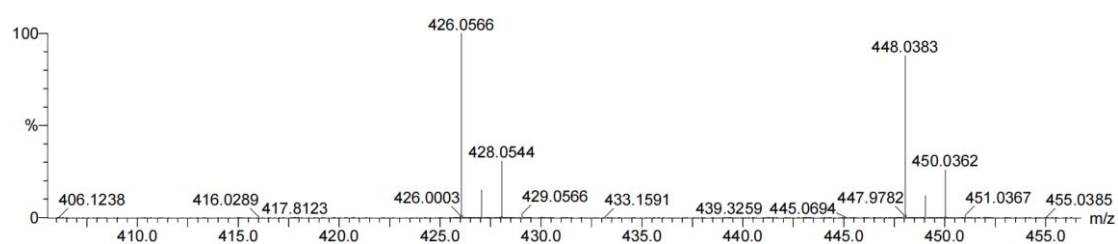

Figure S84. High resolution mass spectrum of compound A23.

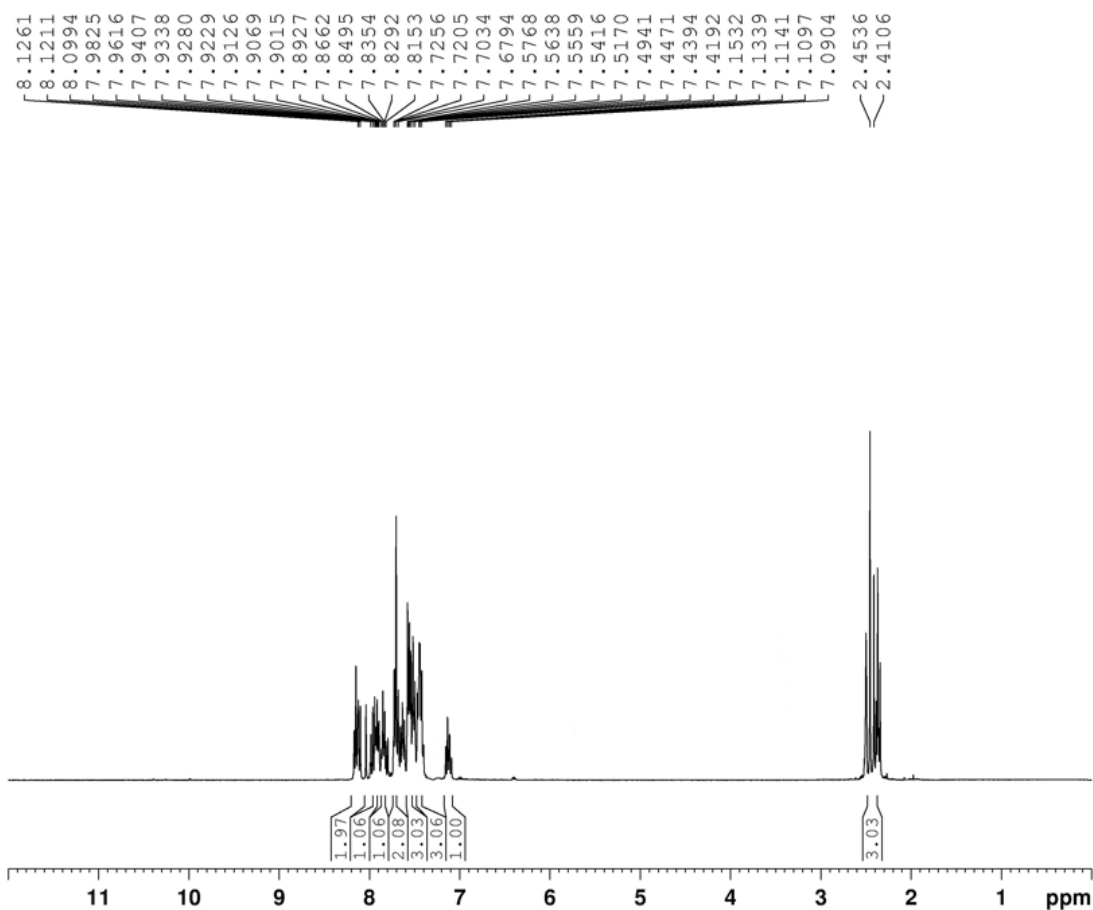

Figure S85. <sup>1</sup>H NMR spectrum of compound A24 (400 MHz, DMSO).

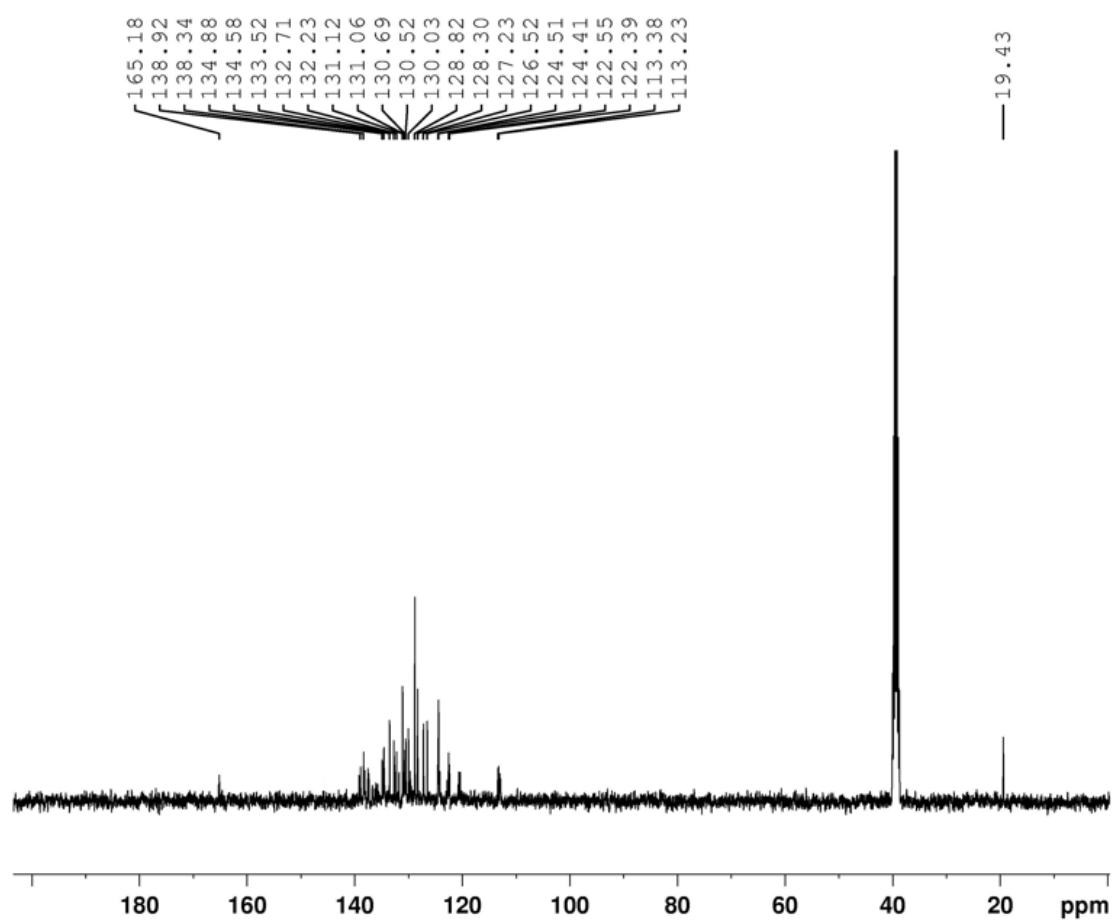

Figure S86. <sup>13</sup>C NMR spectrum of compound A24 (101 MHz, DMSO).

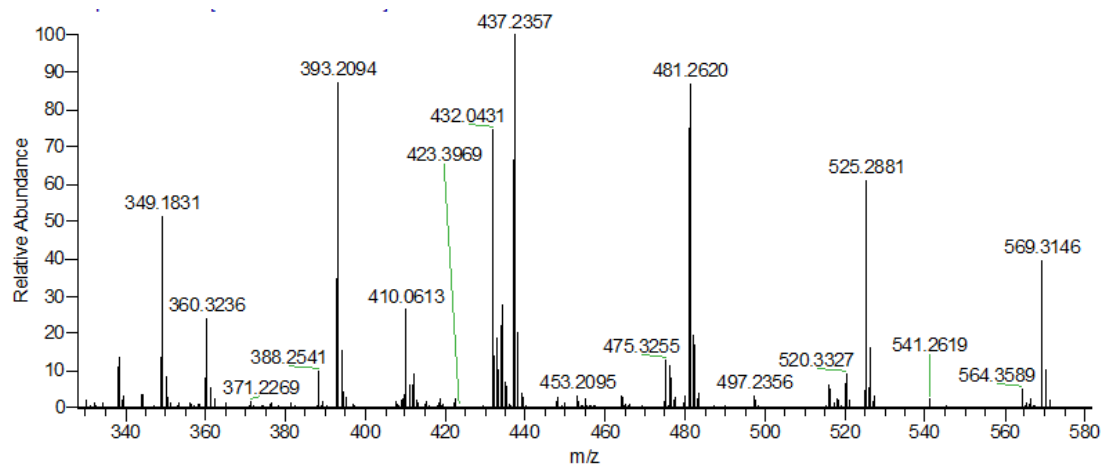

Figure S87. High resolution mass spectrum of compound A24.

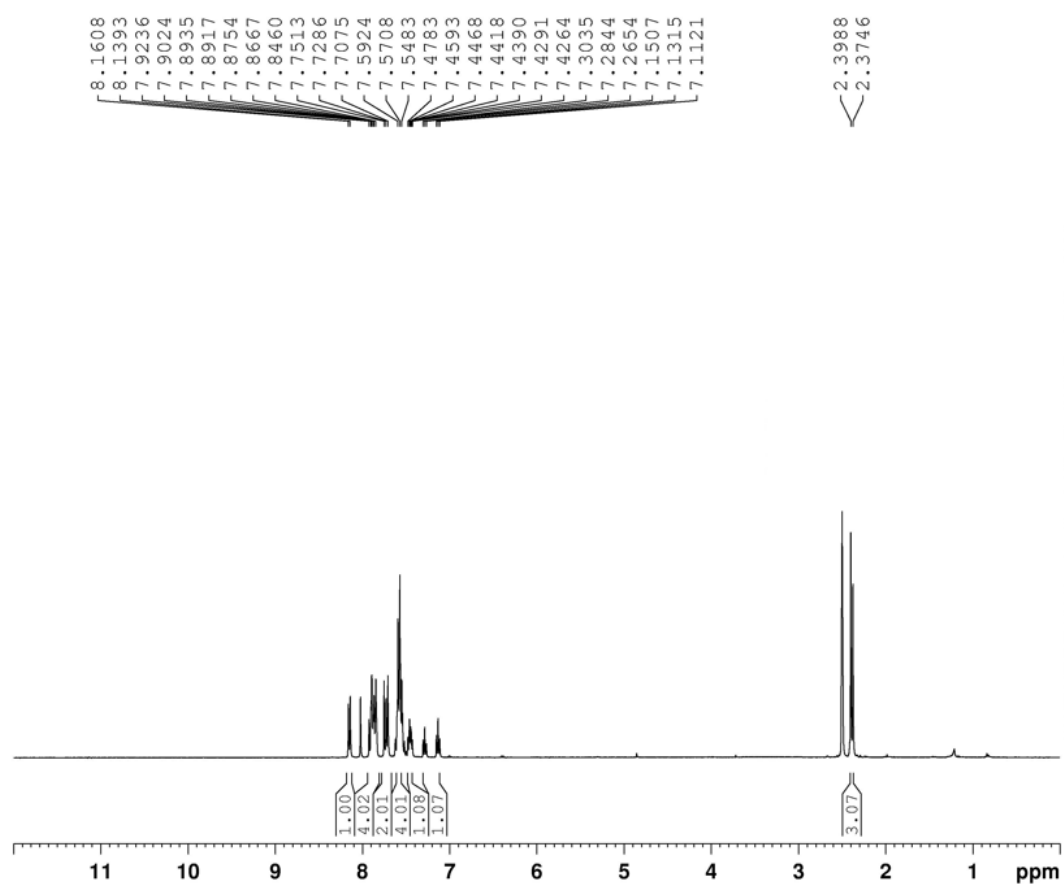

Figure S88. <sup>1</sup>H NMR spectrum of compound A25 (400 MHz, DMSO).

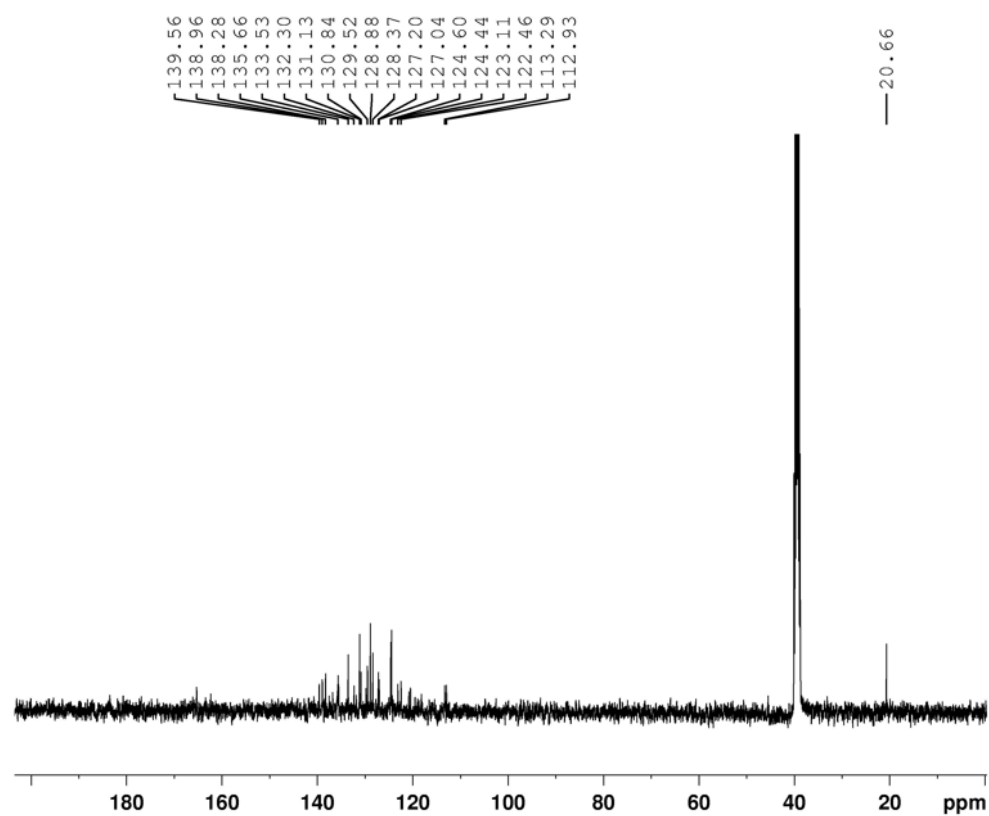

Figure S89. <sup>13</sup>C NMR spectrum of compound A25 (101 MHz, DMSO).

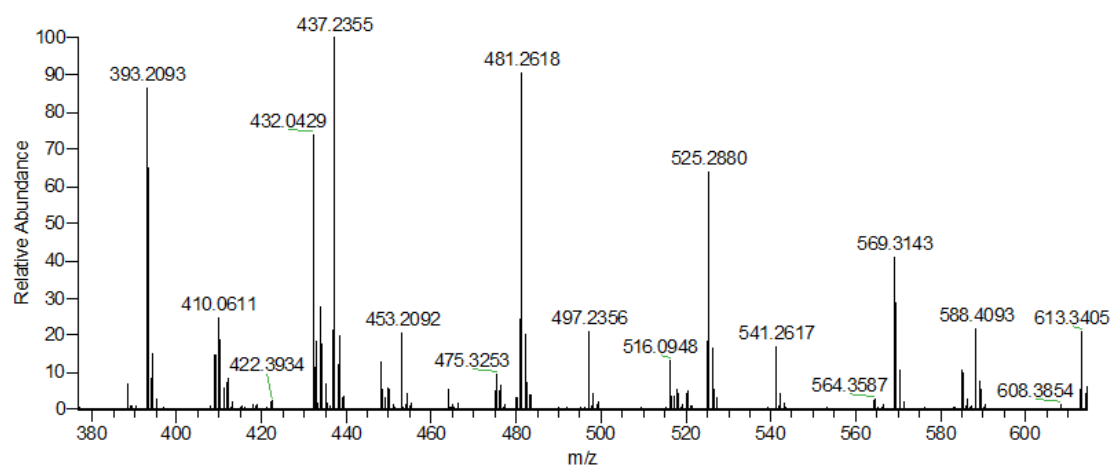

Figure S90. High resolution mass spectrum of compound A25.

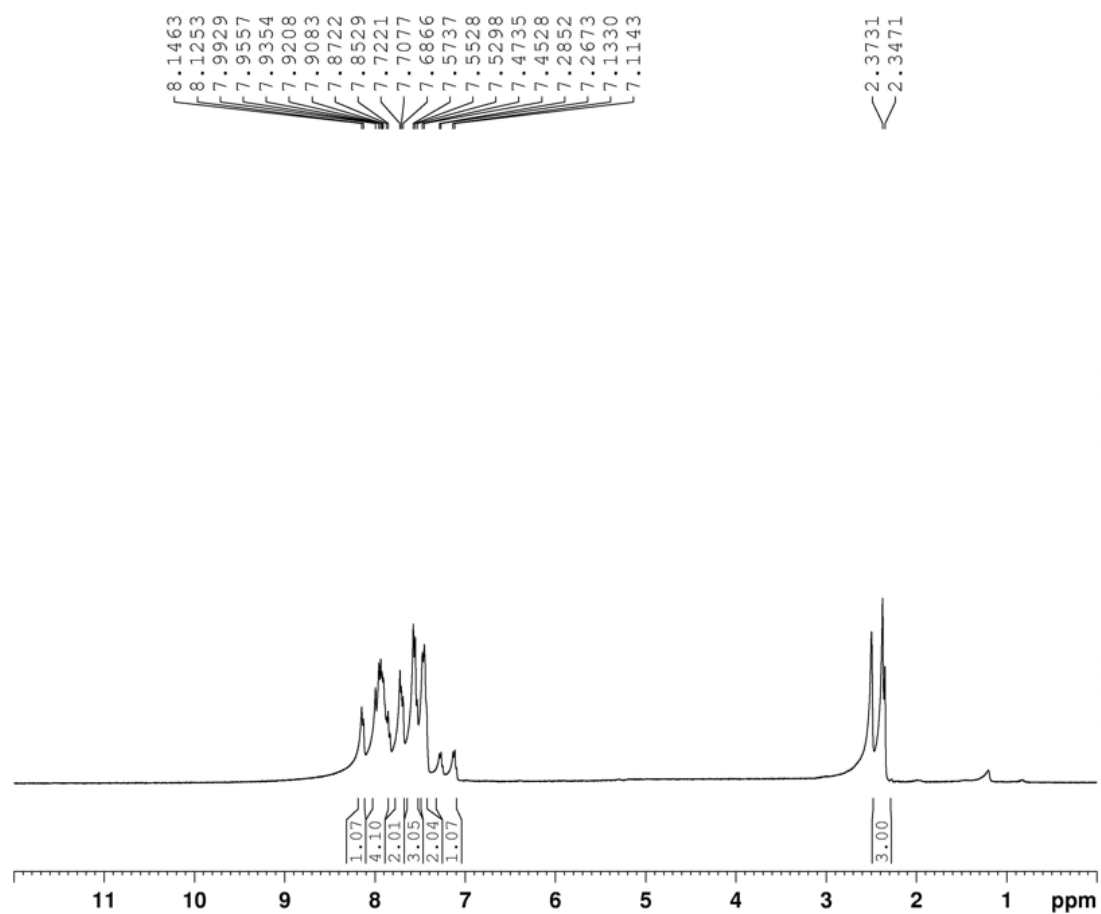

Figure S91. <sup>1</sup>H NMR spectrum of compound A26 (400 MHz, DMSO).

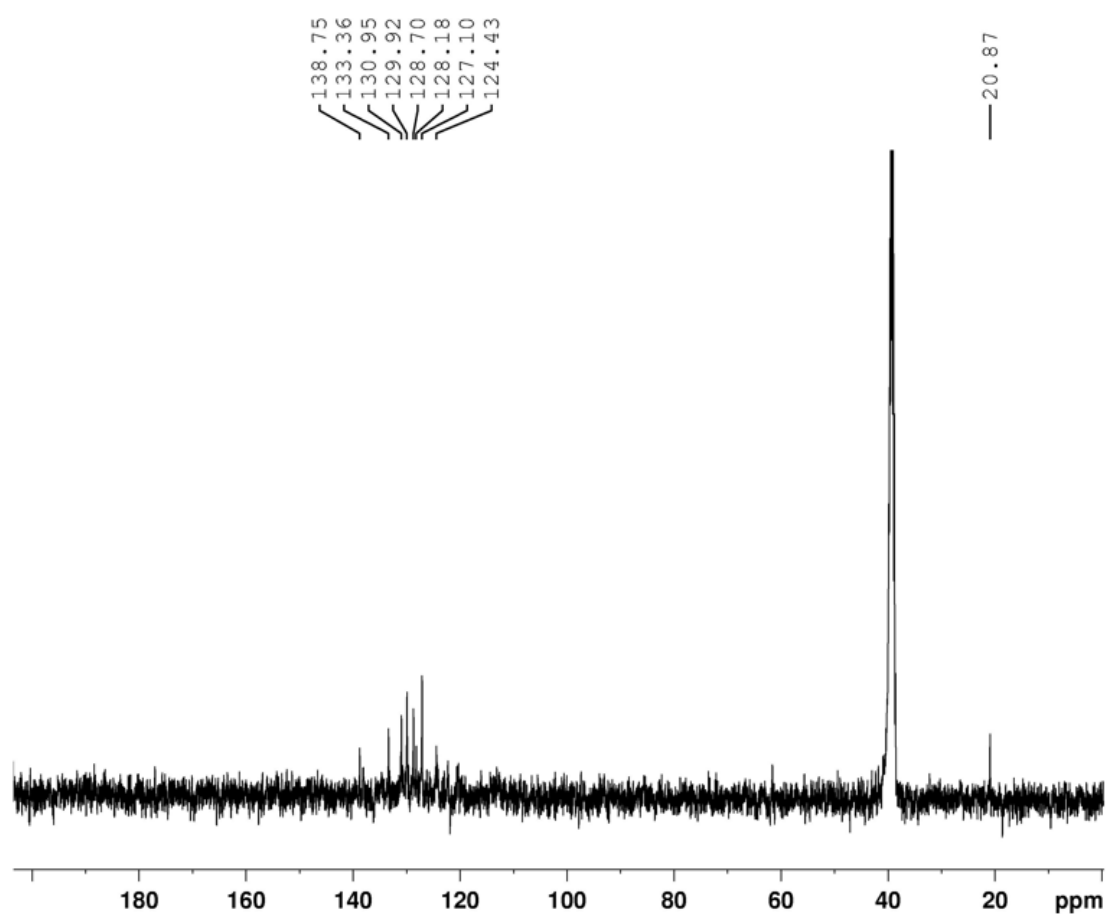

Figure S92.  $^{13}\text{C}$  NMR spectrum of compound A26 (101 MHz, DMSO).

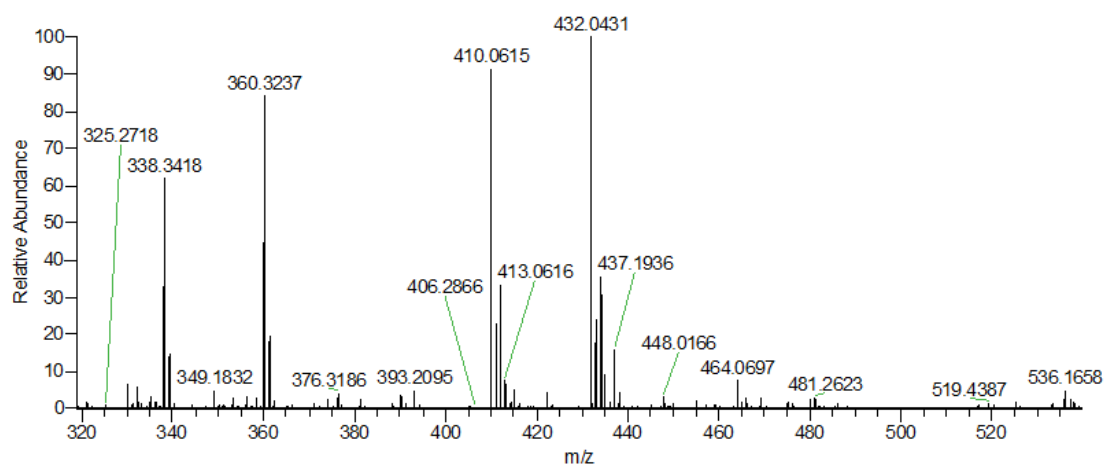

Figure S93. High resolution mass spectrum of compound A26.



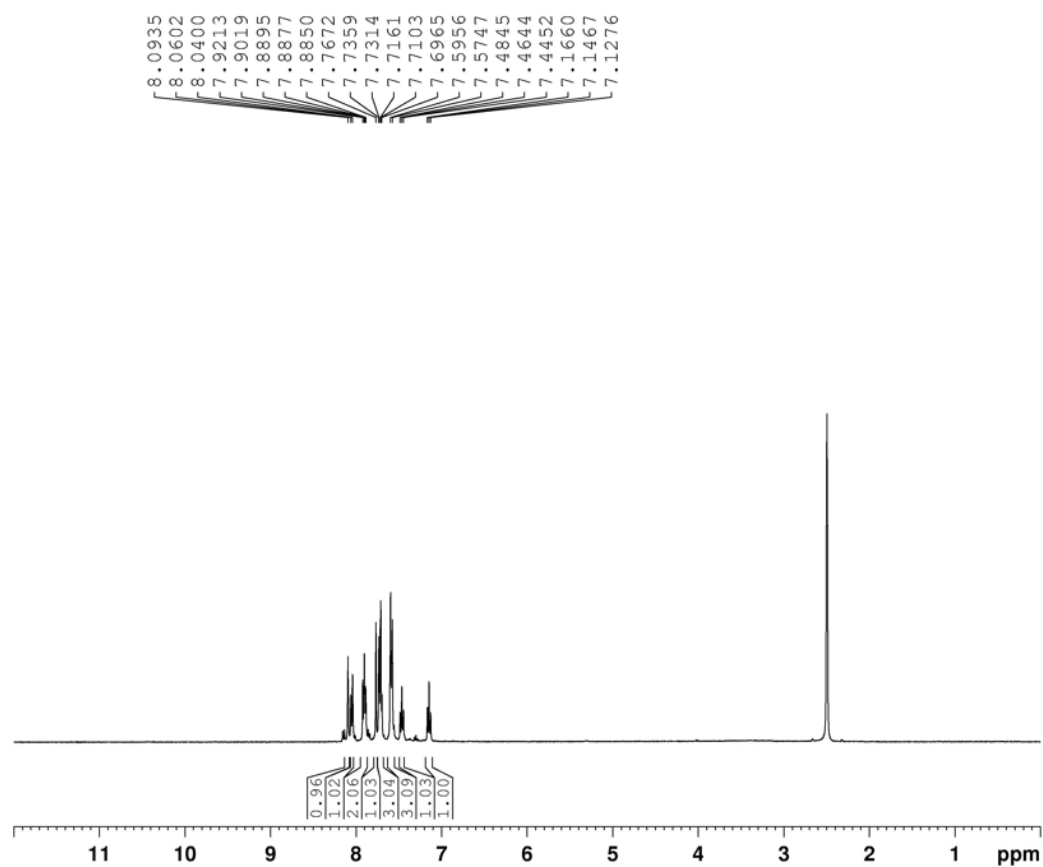

Figure S94. <sup>1</sup>H NMR spectrum of compound A27 (400 MHz, DMSO).

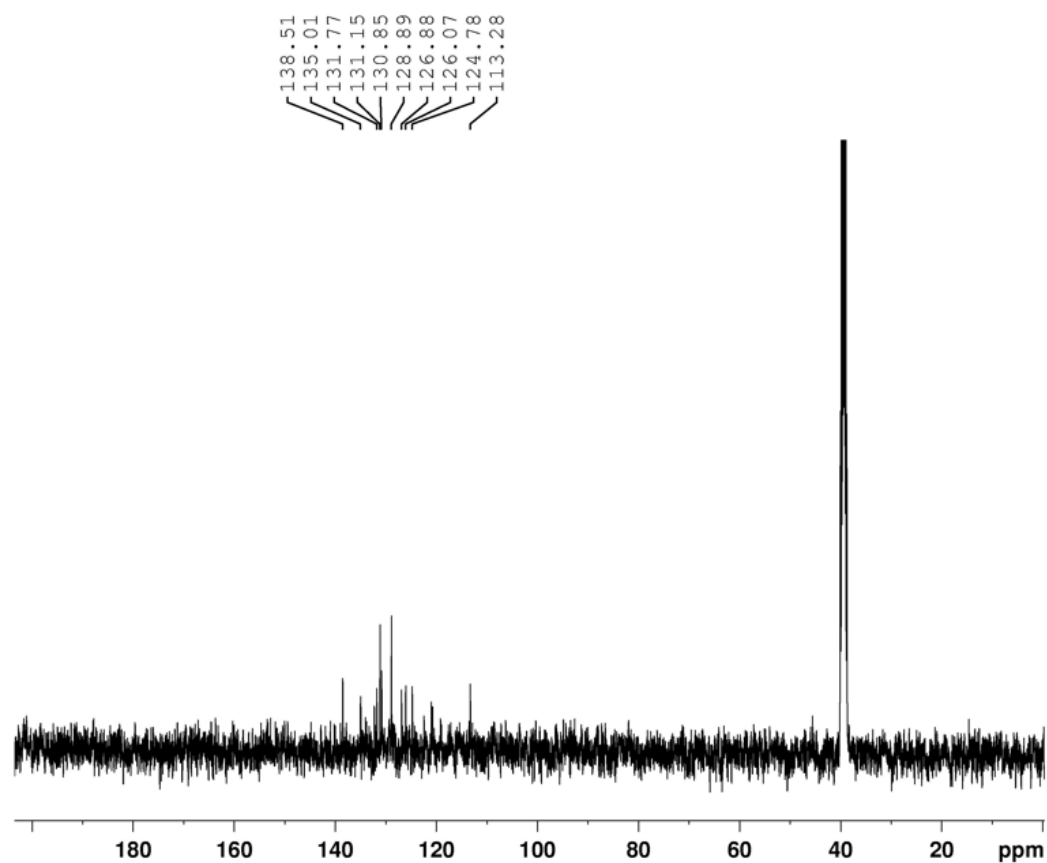

Figure S95. <sup>13</sup>C NMR spectrum of compound A27 (101 MHz, DMSO).

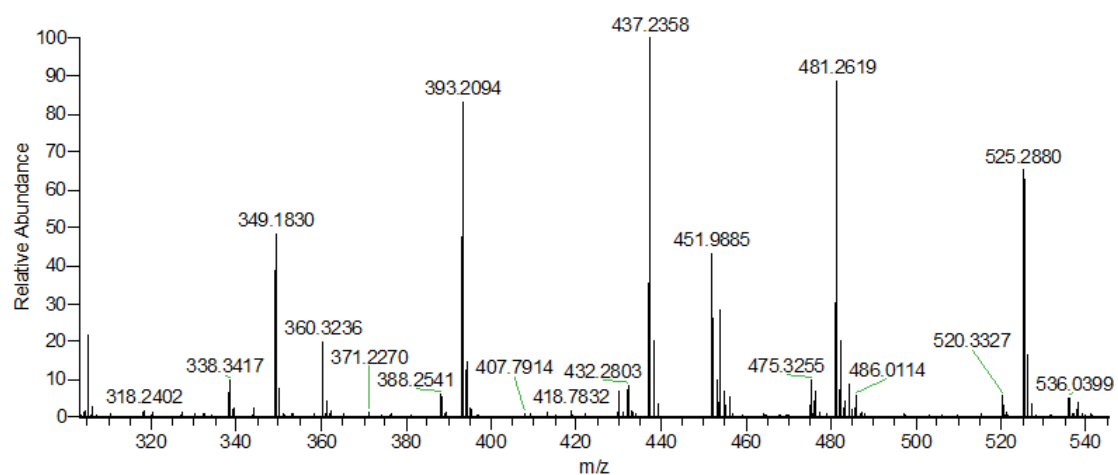

Figure S96. High resolution mass spectrum of compound A27.

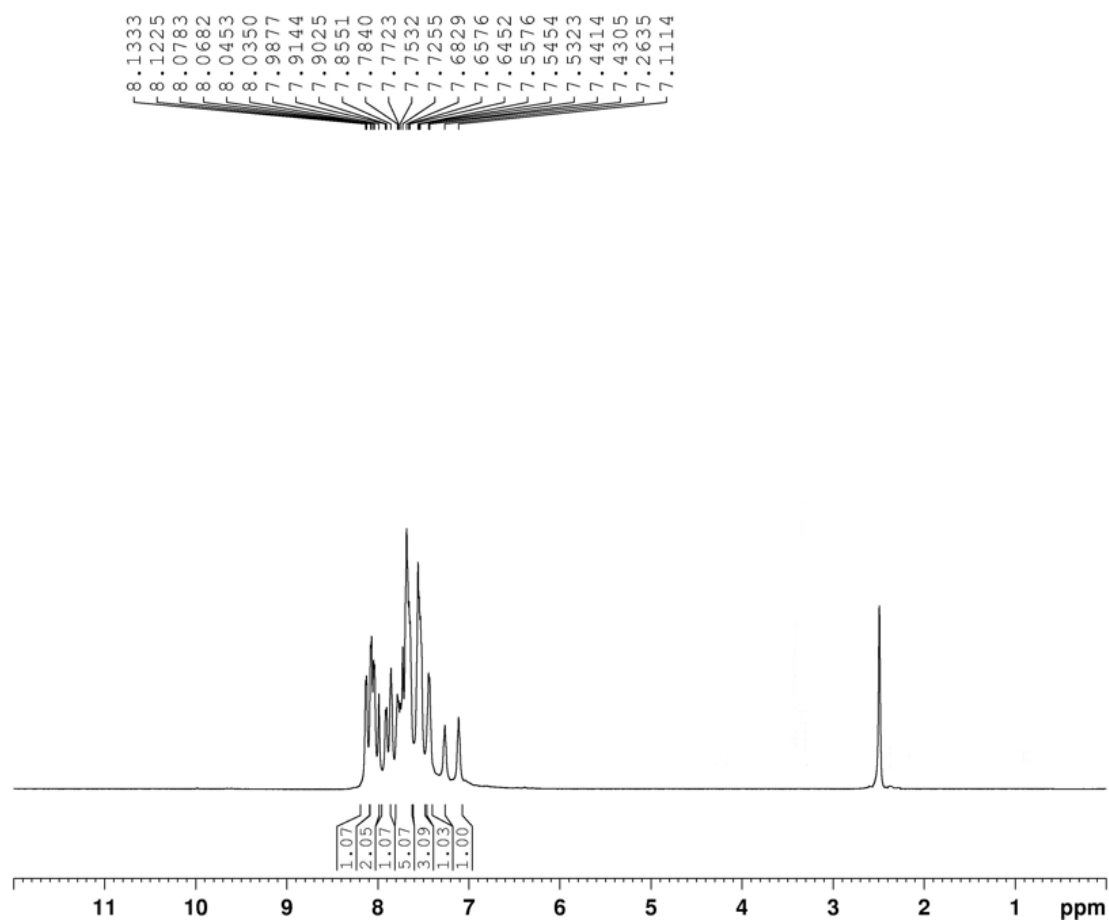

Figure S97. <sup>1</sup>H NMR spectrum of compound A28 (600 MHz, DMSO).

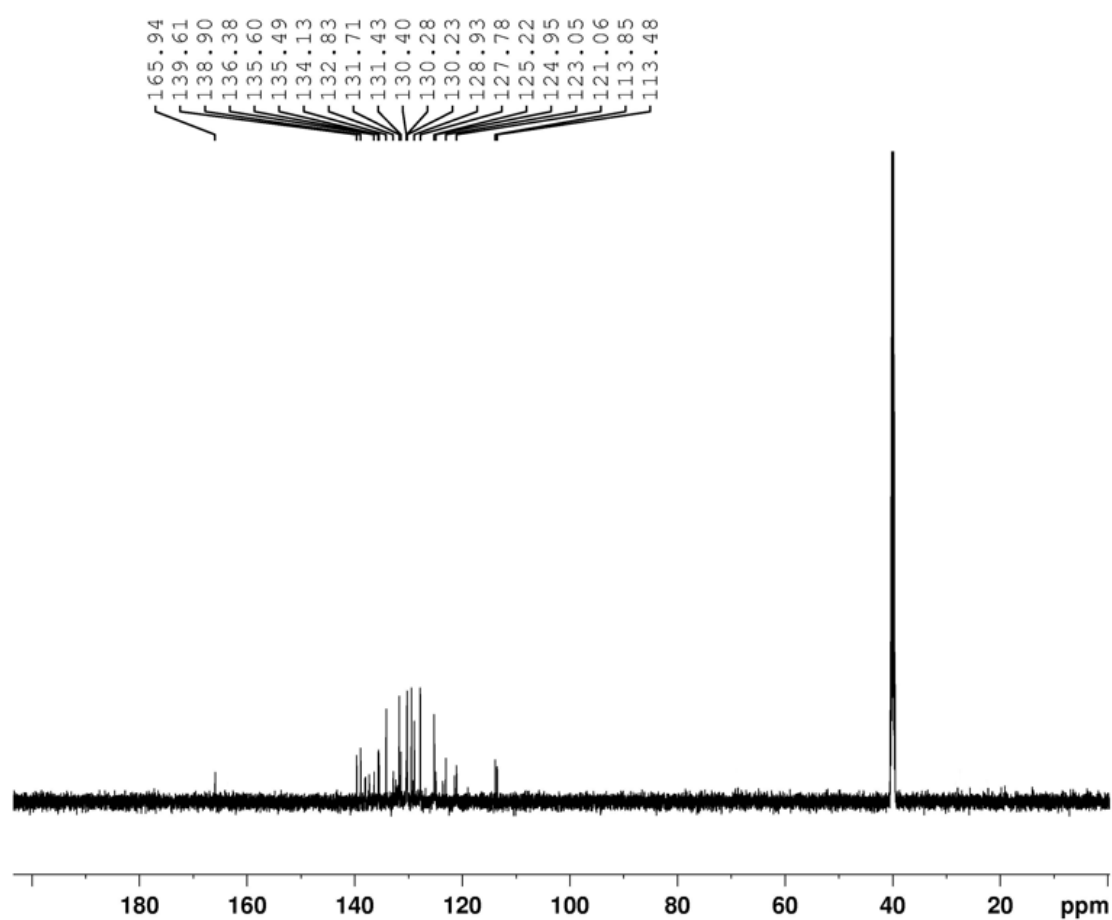

Figure S98. <sup>13</sup>C NMR spectrum of compound A28 (151 MHz, DMSO).

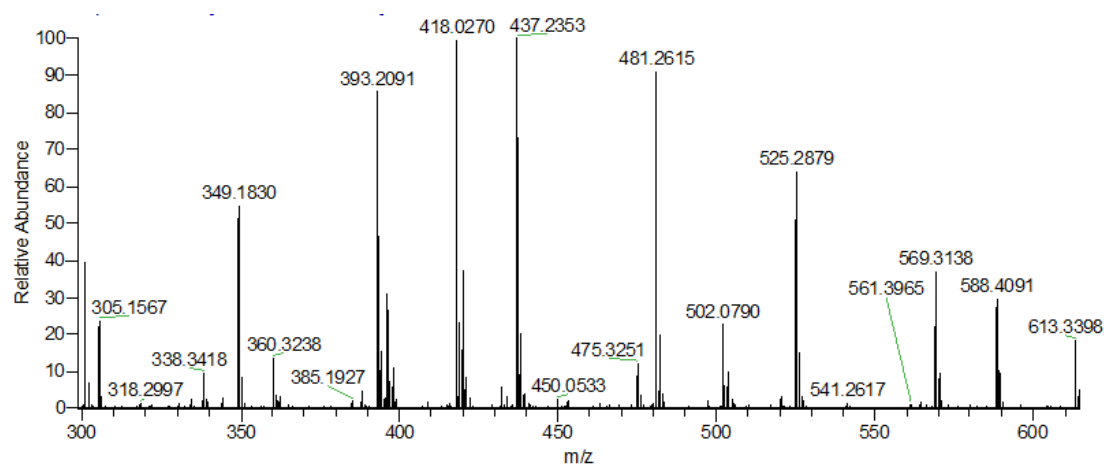

Figure S99. High resolution mass spectrum of compound A28.

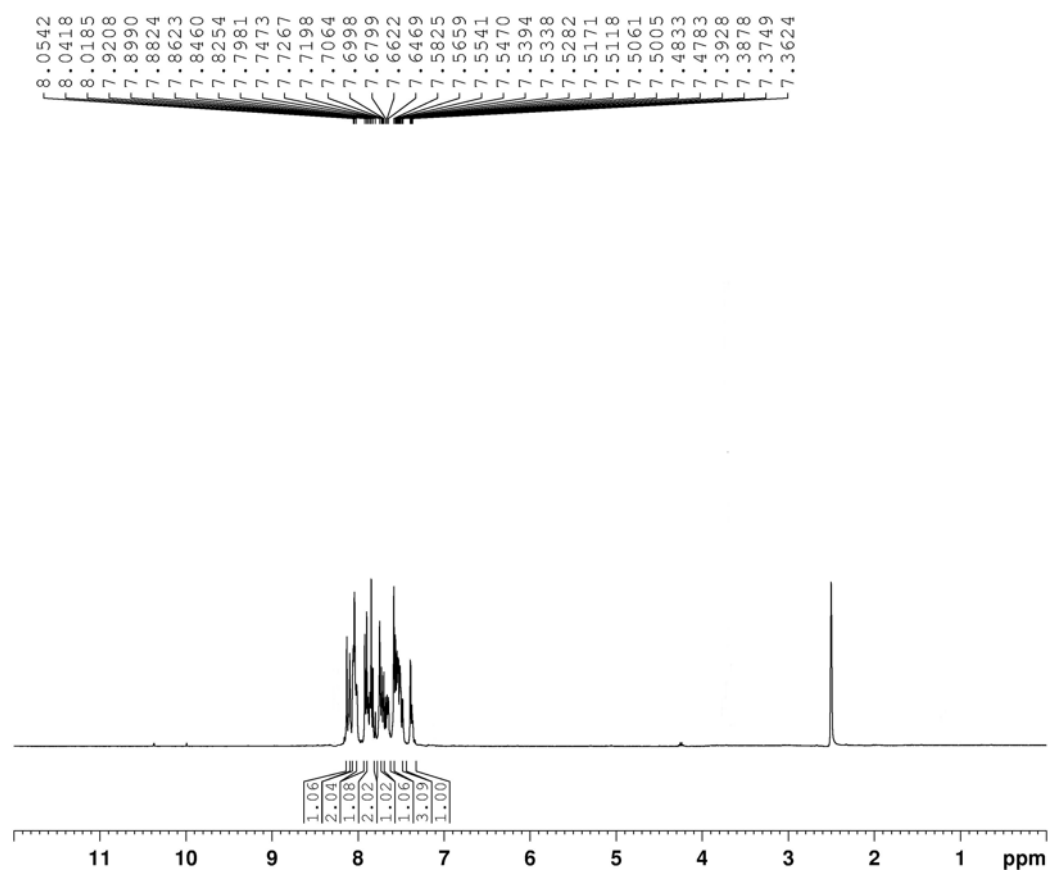

Figure S100. <sup>1</sup>H NMR spectrum of compound A29 (400 MHz, DMSO).

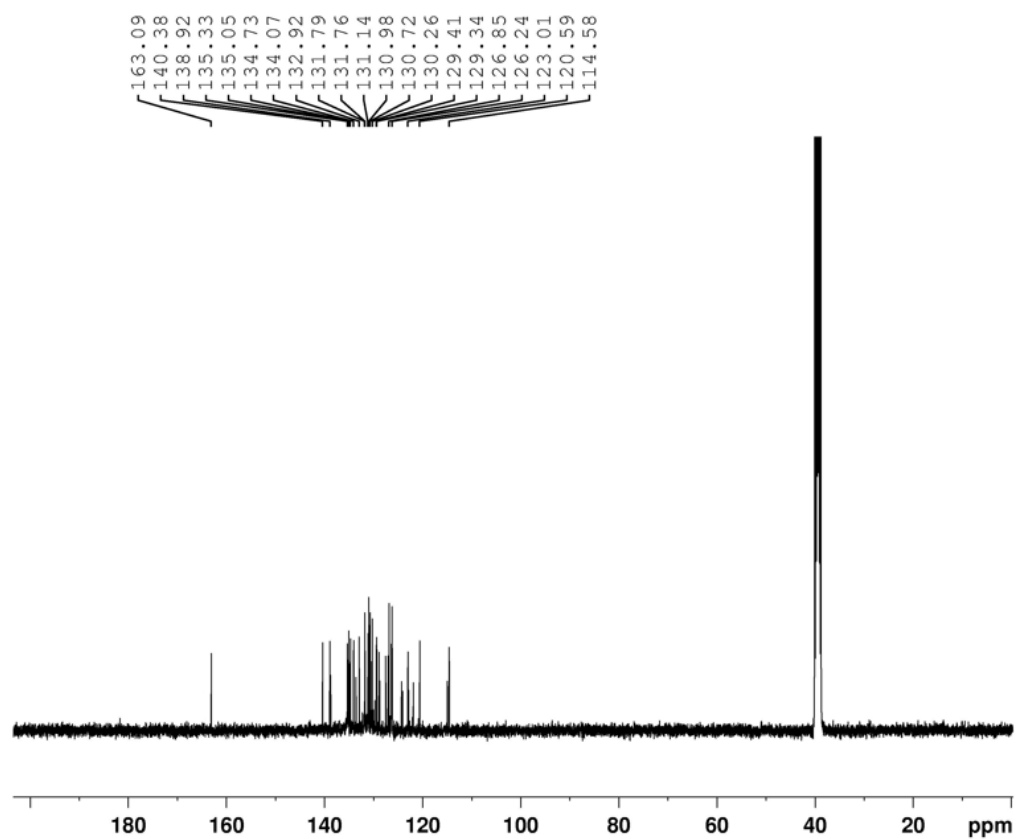

Figure S101. <sup>13</sup>C NMR spectrum of compound A29 (101 MHz, DMSO).

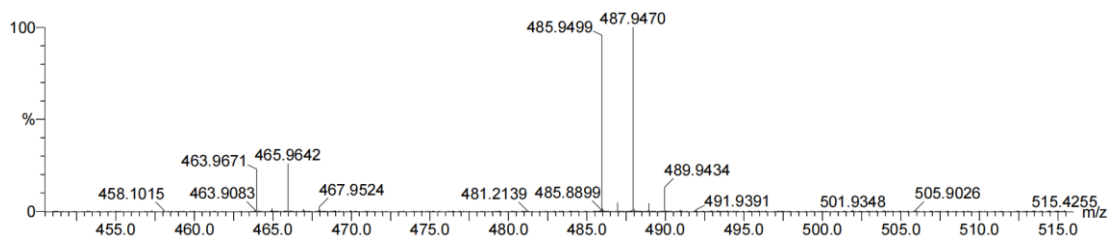

Figure S102. High resolution mass spectrum of compound A29.

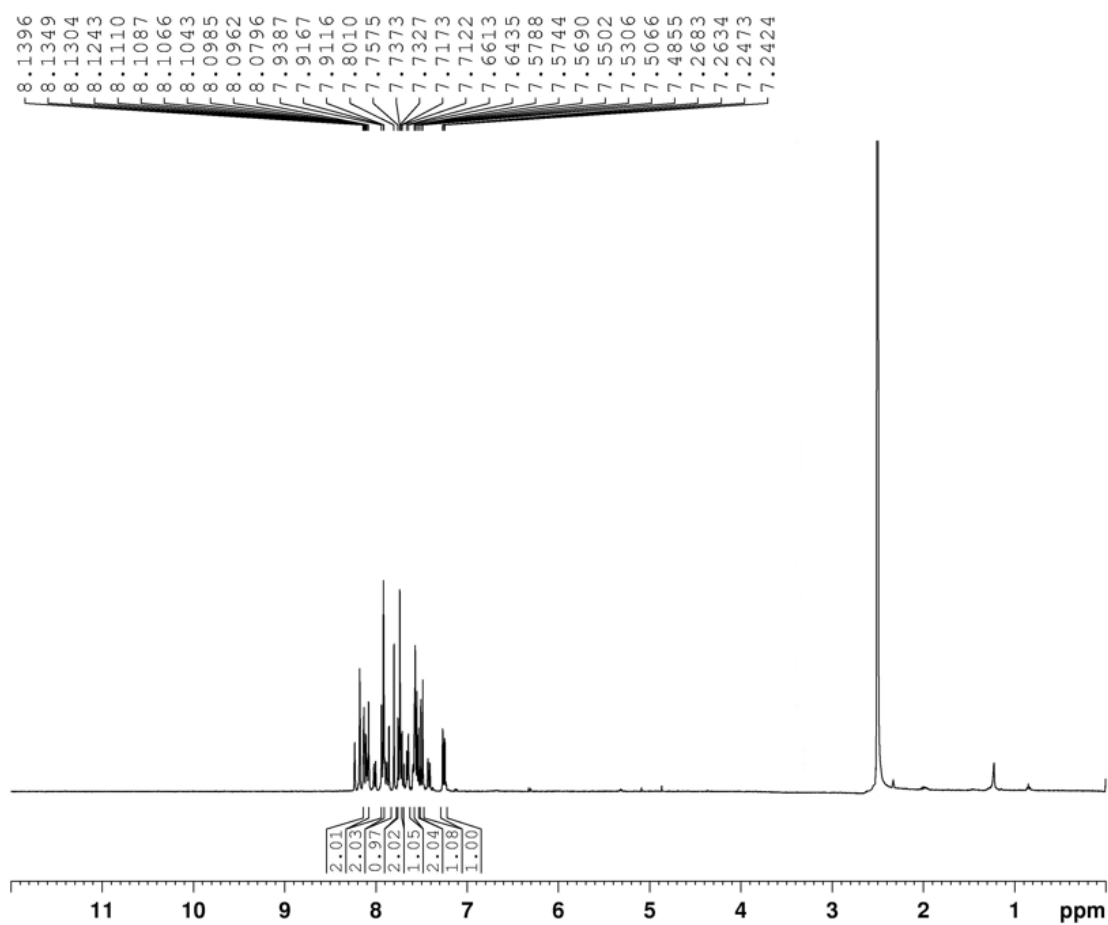

Figure S103. <sup>1</sup>H NMR spectrum of compound A30 (400 MHz, DMSO).

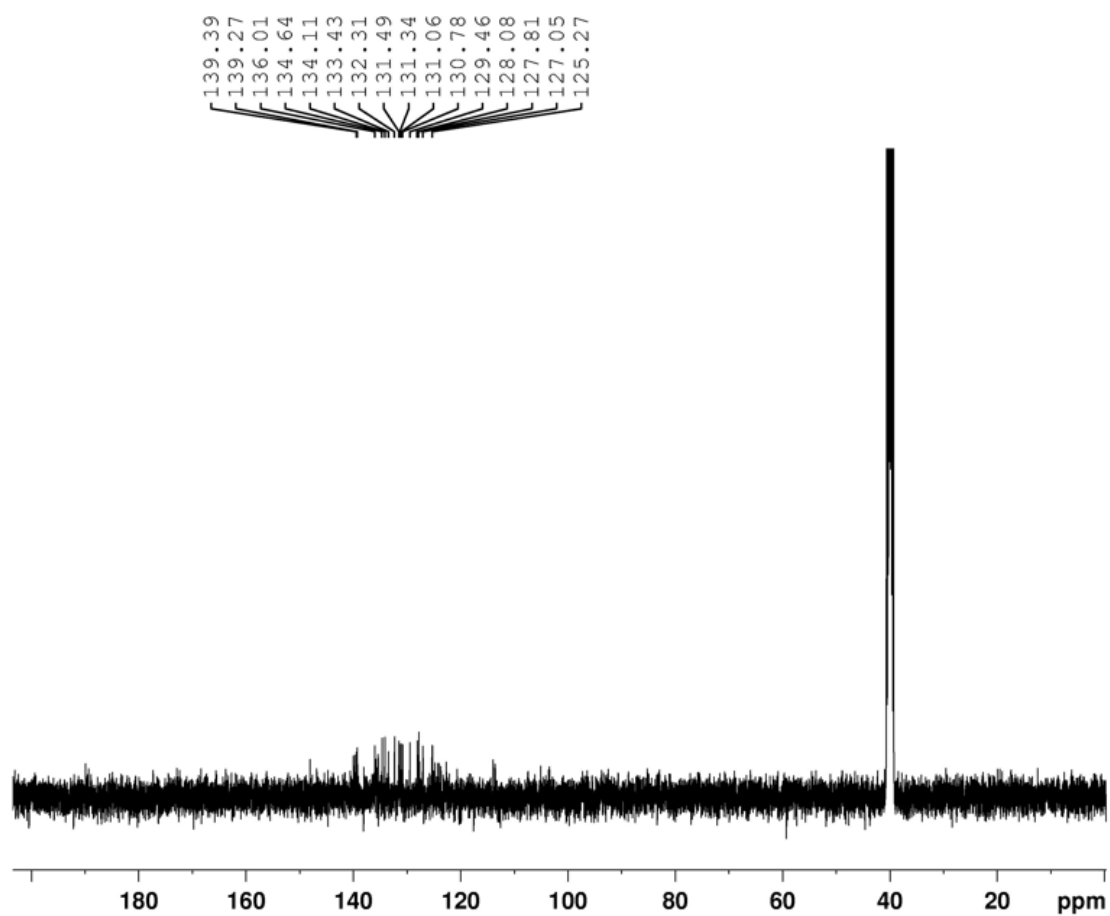

Figure S104. <sup>13</sup>C NMR spectrum of compound A30 (101 MHz, DMSO).

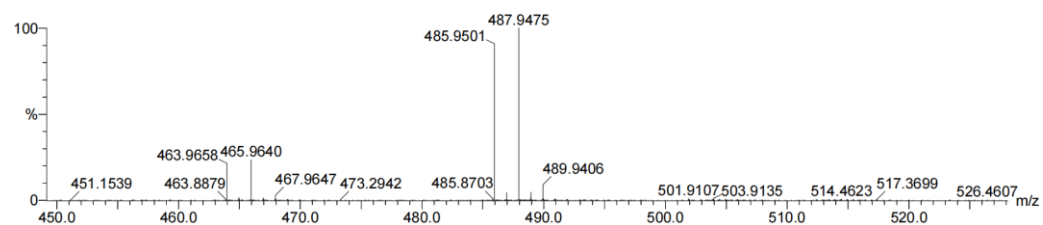

Figure S105. High resolution mass spectrum of compound A30.

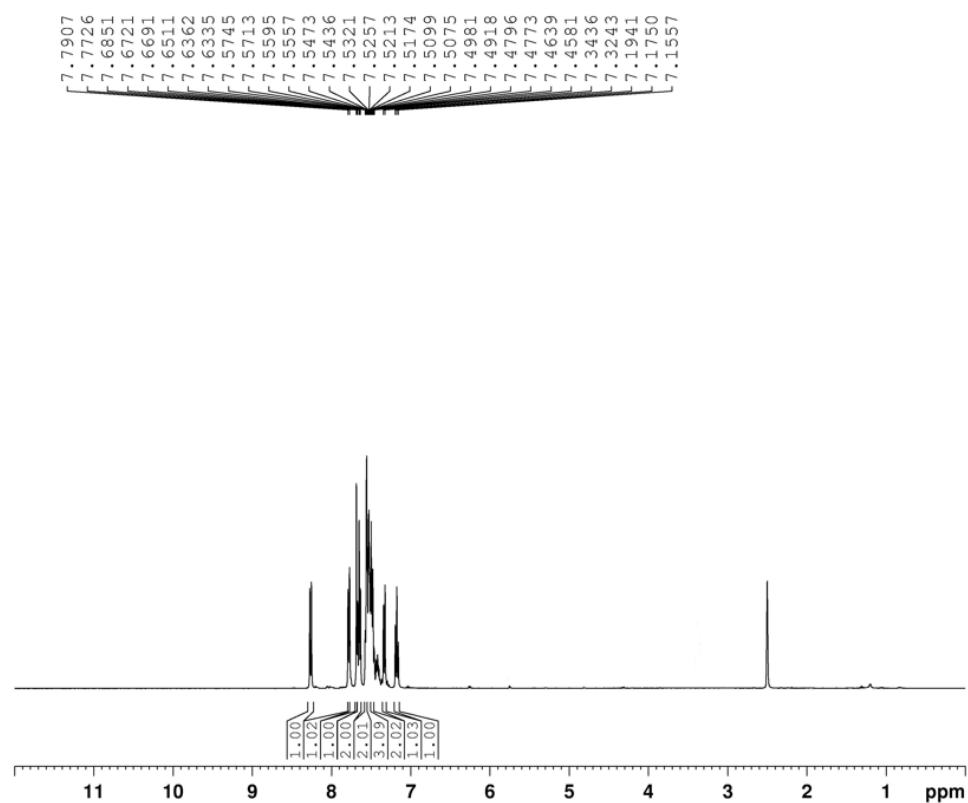

Figure S106. <sup>1</sup>H NMR spectrum of compound B1 (400 MHz, DMSO).

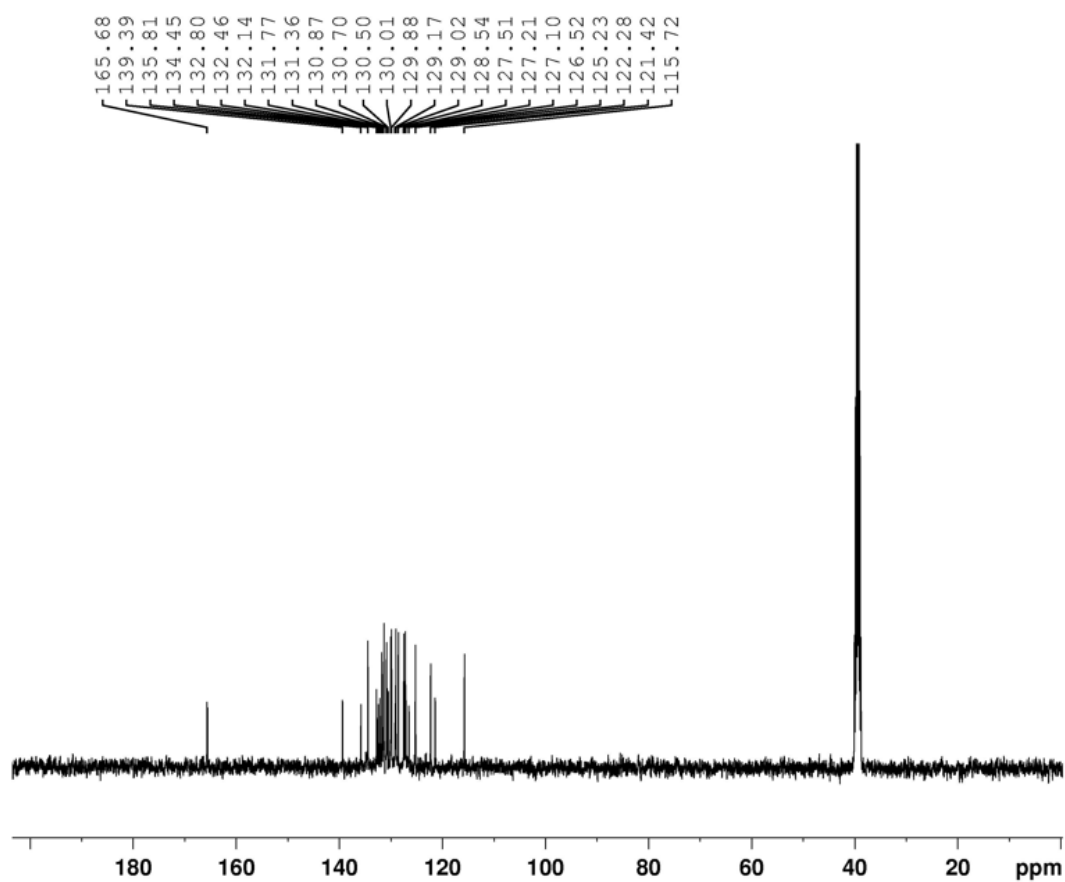

Figure S107. <sup>13</sup>C NMR spectrum of compound B1 (101 MHz, DMSO).

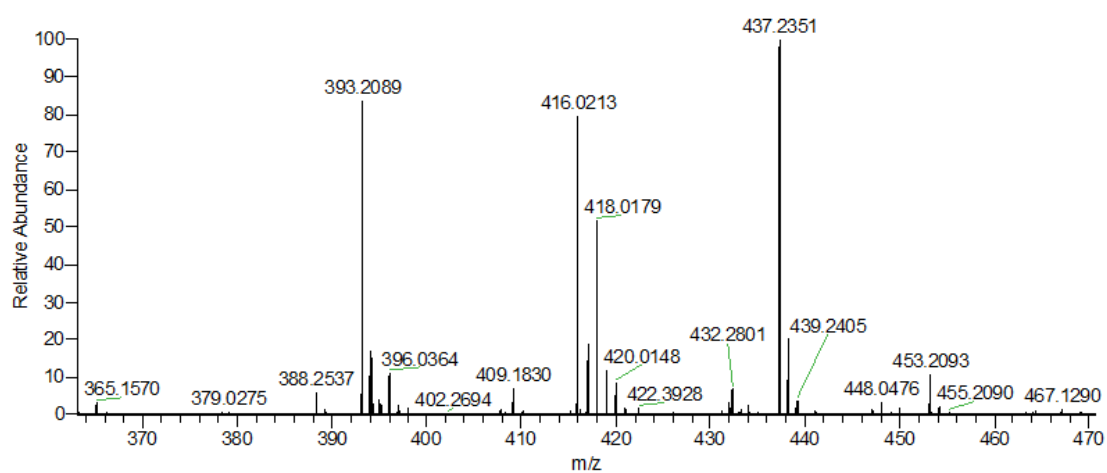

Figure S108. High resolution mass spectrum of compound B1.

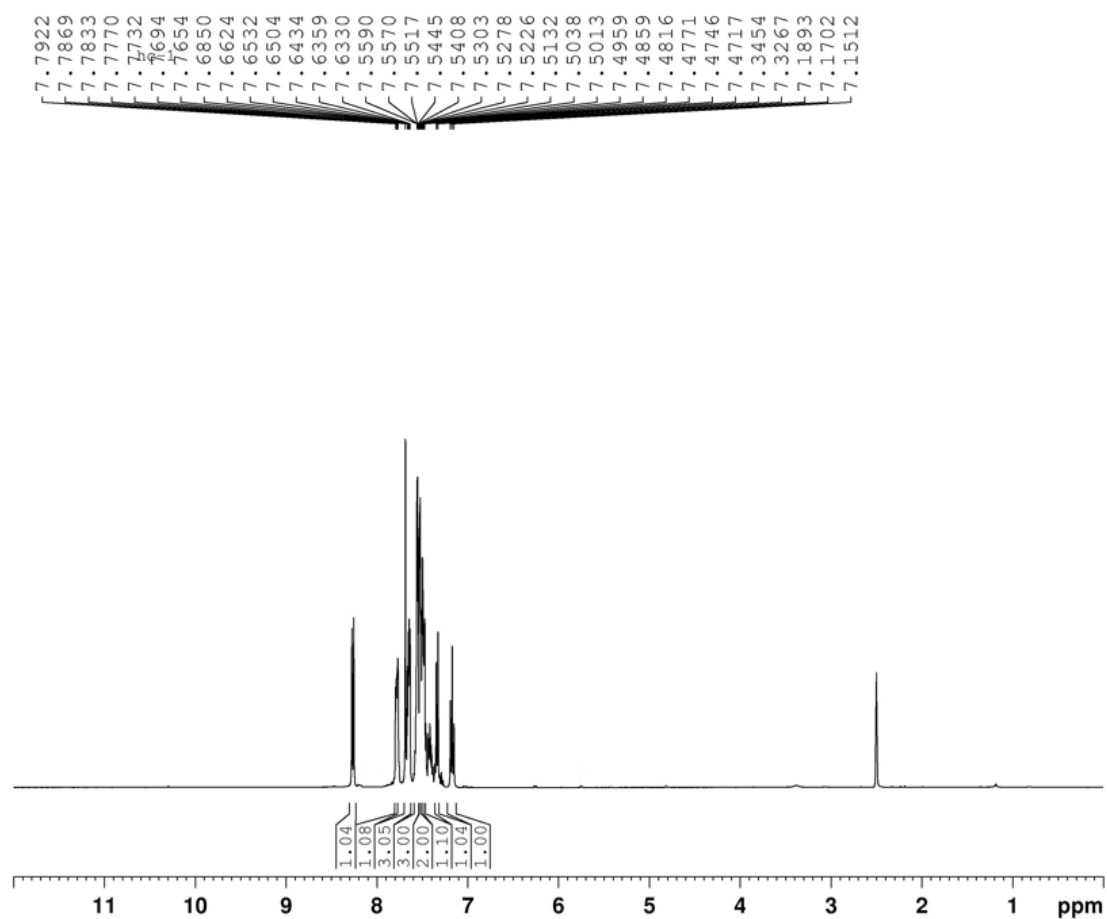

Figure S109.  $^1\text{H}$  NMR spectrum of compound B2 (400 MHz, DMSO).



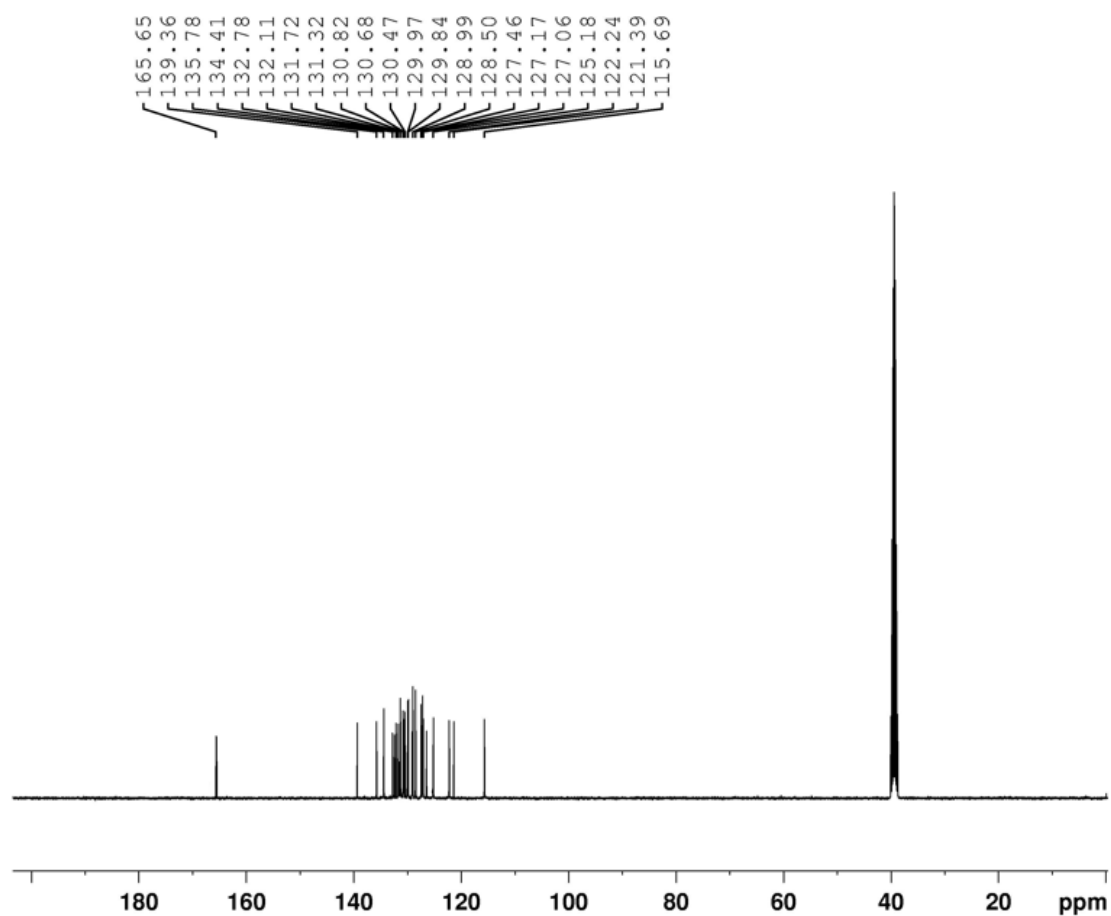

Figure S110. <sup>13</sup>C NMR spectrum of compound B2 (101 MHz, DMSO).

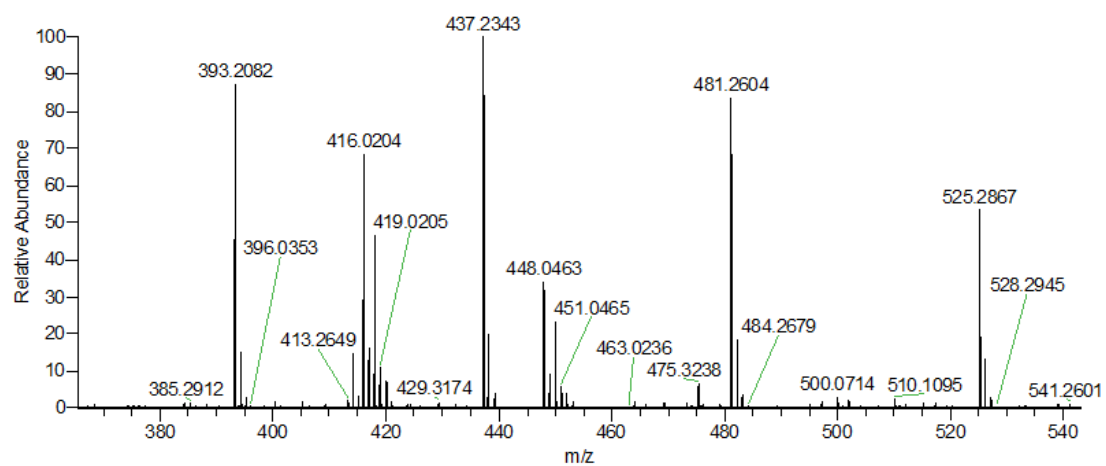

Figure S111. High resolution mass spectrum of compound B2.

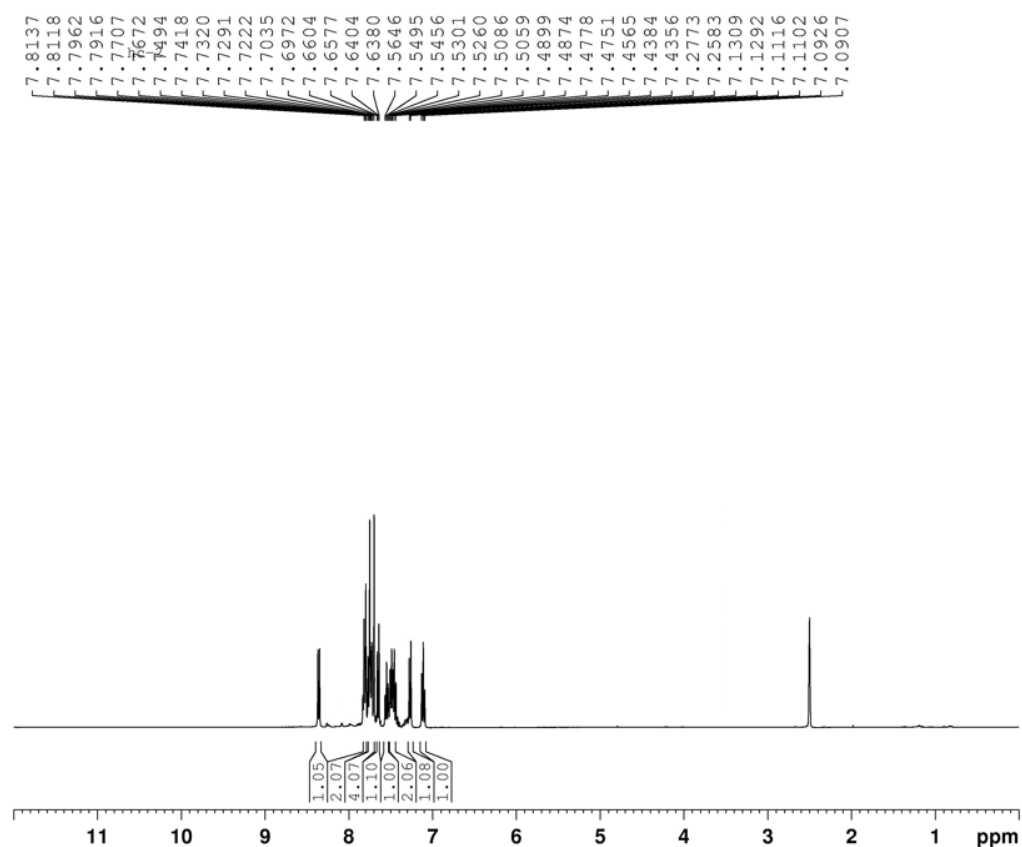

Figure S112. <sup>1</sup>H NMR spectrum of compound B3 (400 MHz, DMSO).

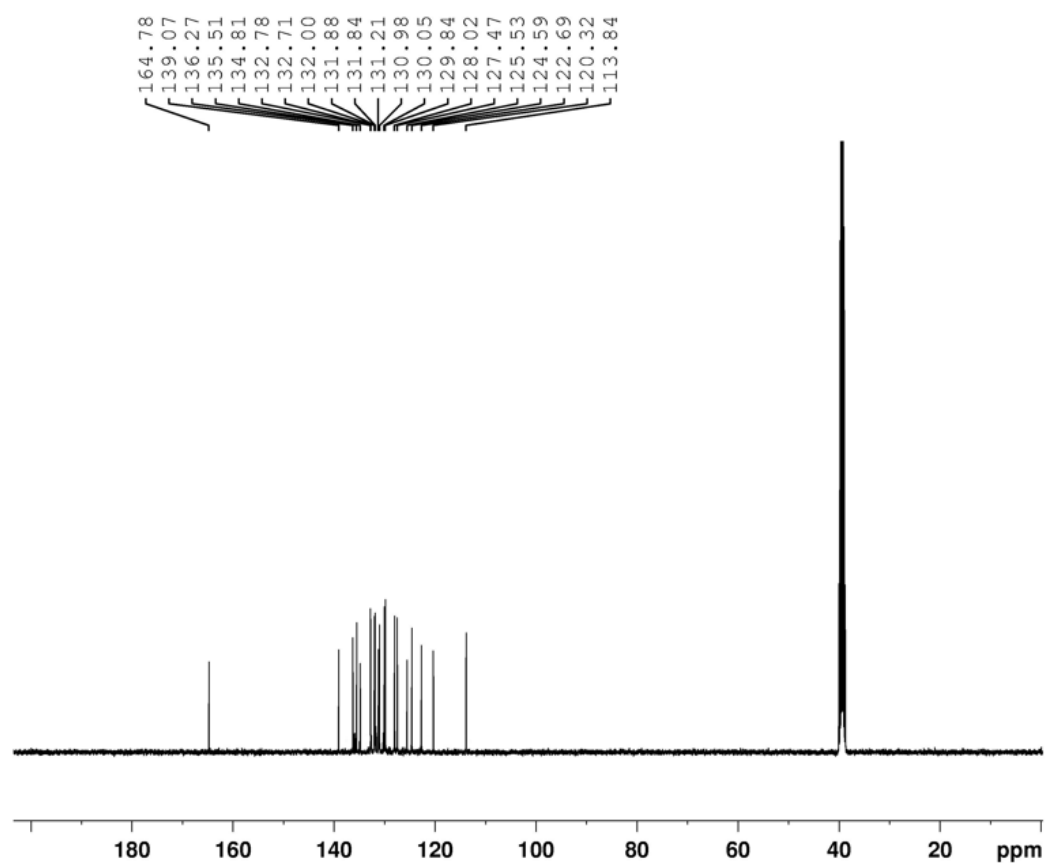

Figure S113. <sup>13</sup>C NMR spectrum of compound B3 (101 MHz, DMSO).

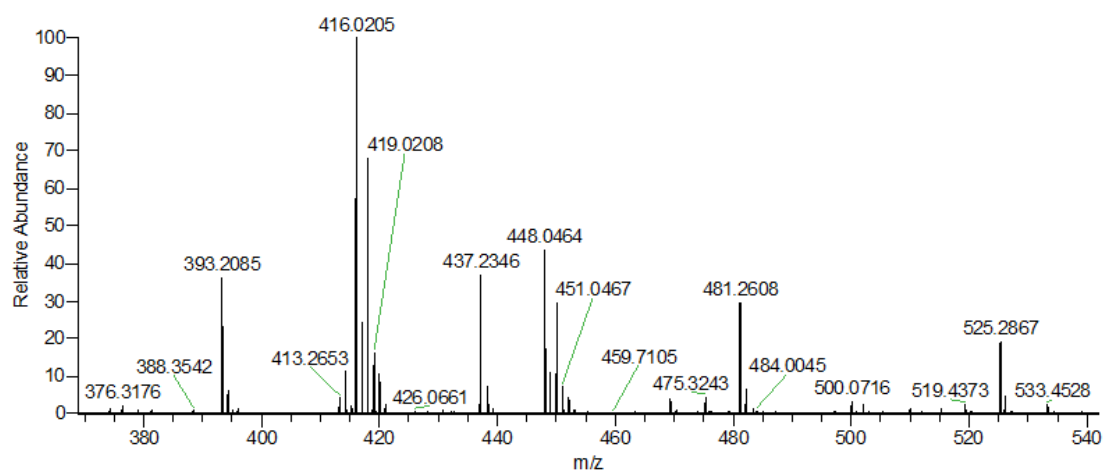

Figure S114. High resolution mass spectrum of compound B3.

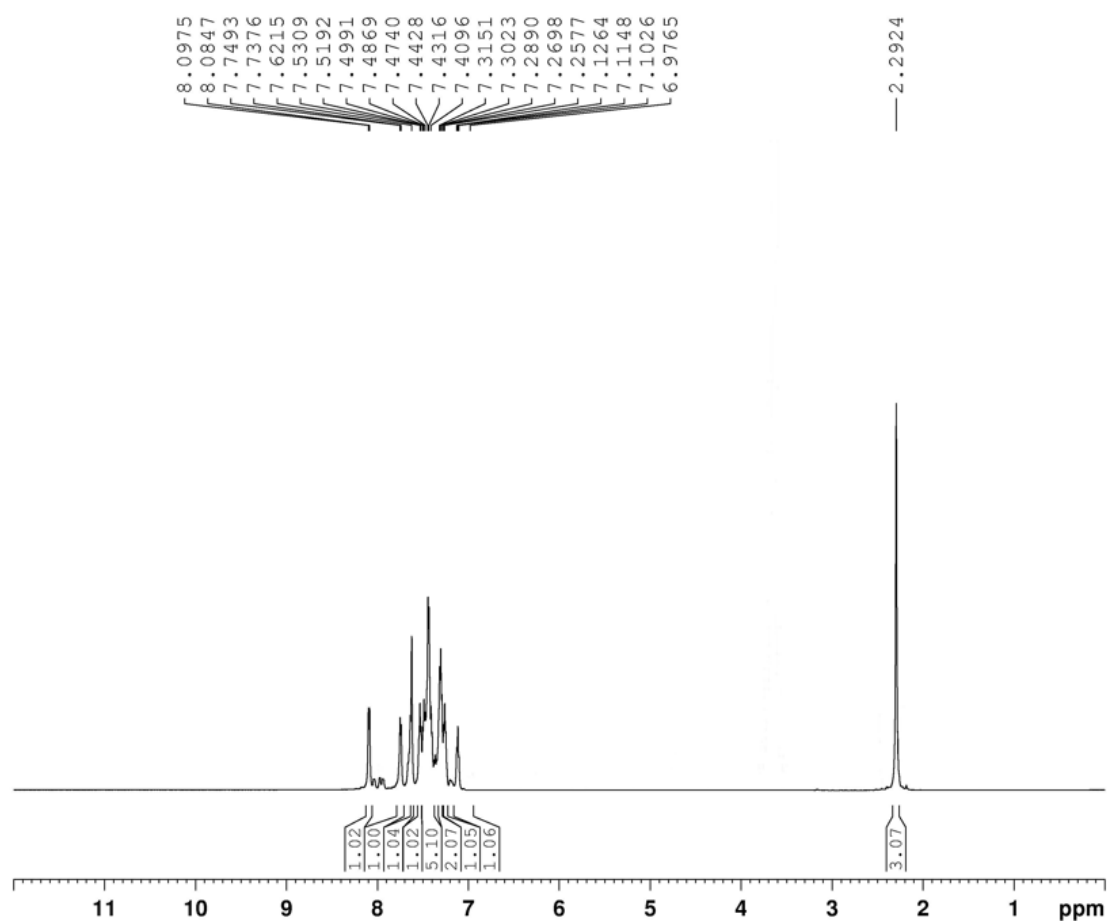

Figure S115. <sup>1</sup>H NMR spectrum of compound B4 (600 MHz, DMSO).

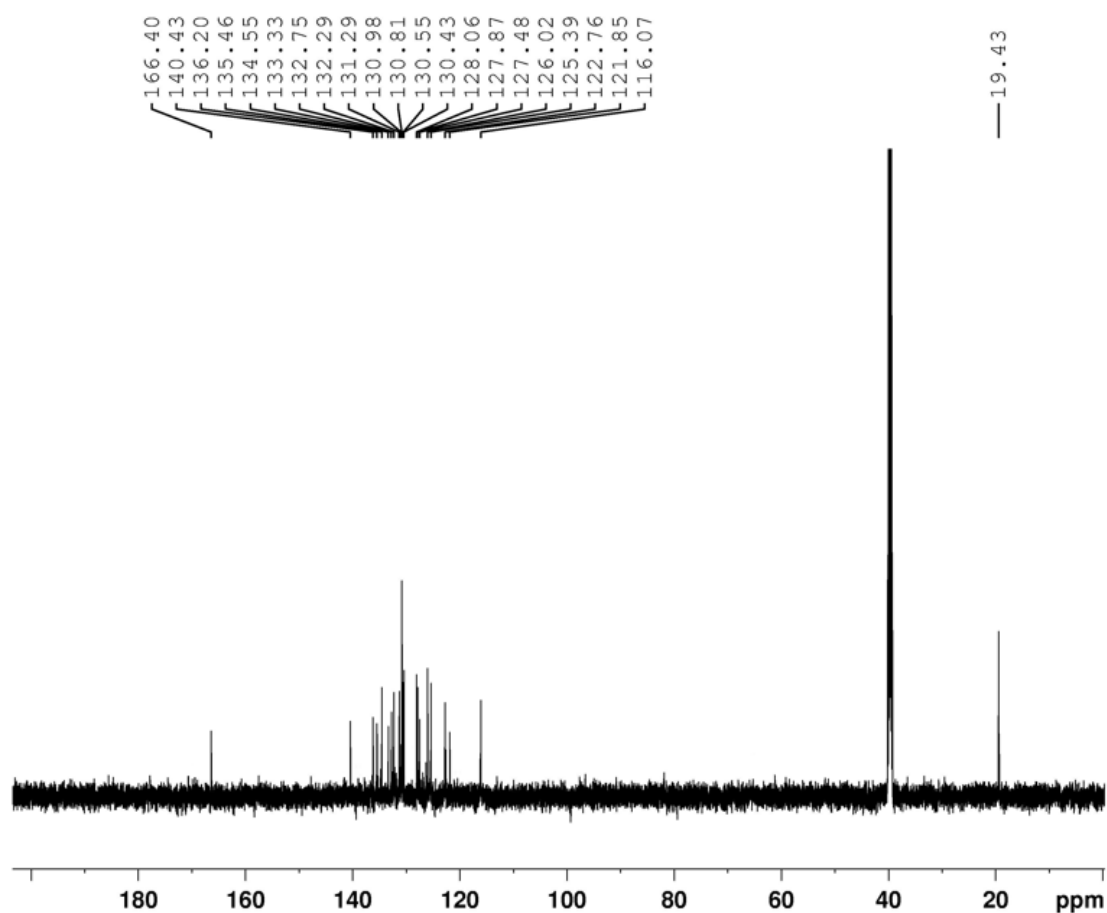

Figure S116. <sup>13</sup>C NMR spectrum of compound B4 (151 MHz, DMSO).

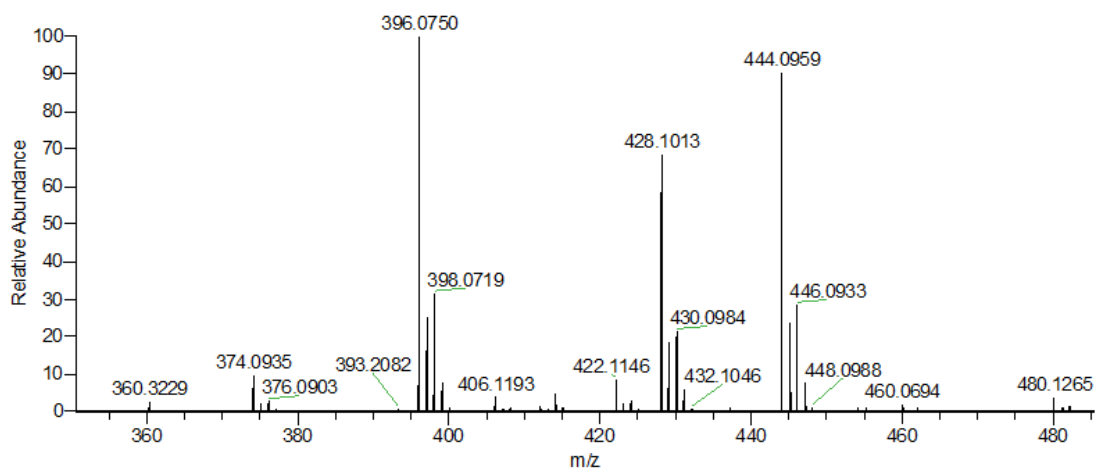

Figure S117. High resolution mass spectrum of compound B4.

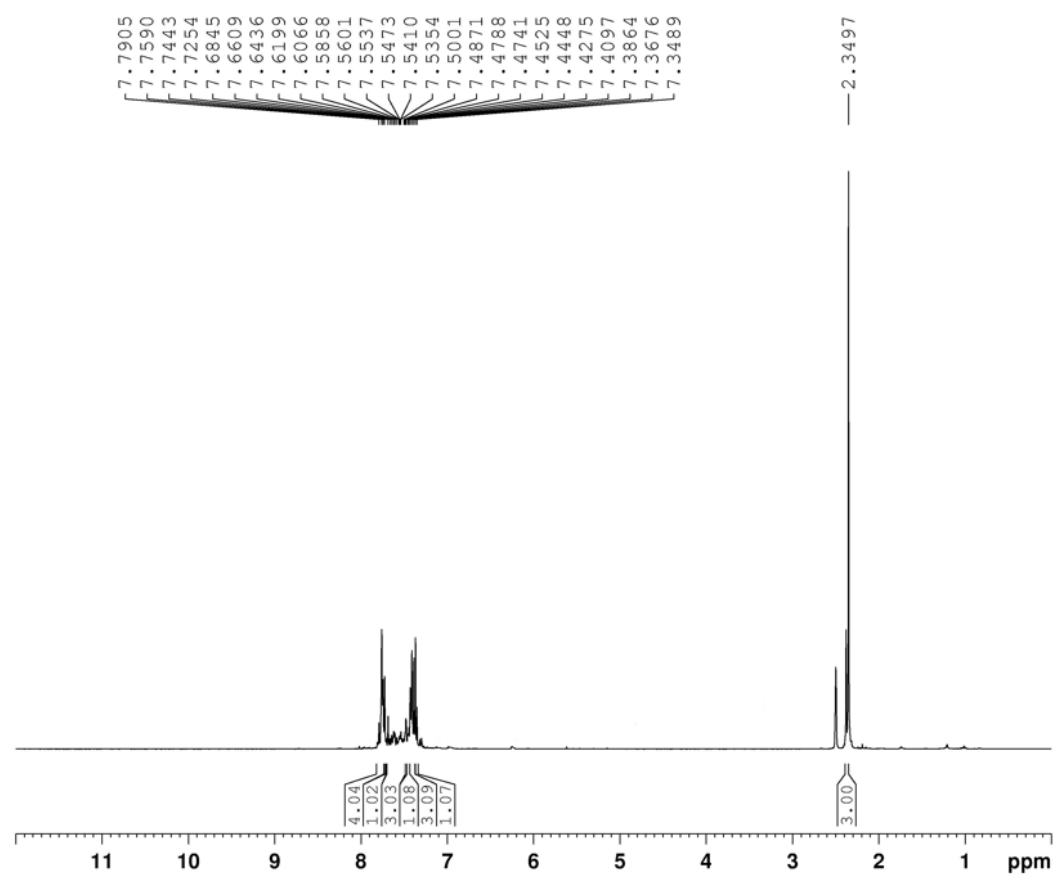

Figure S118. <sup>1</sup>H NMR spectrum of compound B5 (400 MHz, DMSO).

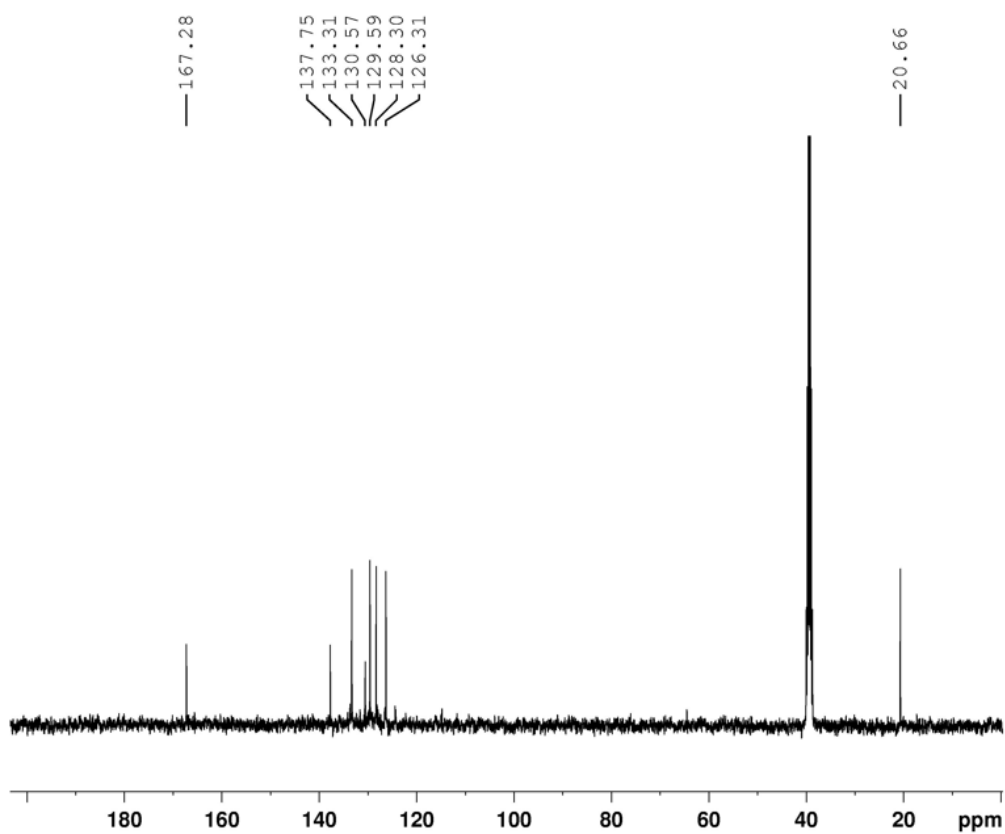

Figure S119. <sup>13</sup>C NMR spectrum of compound B5 (101 MHz, DMSO).

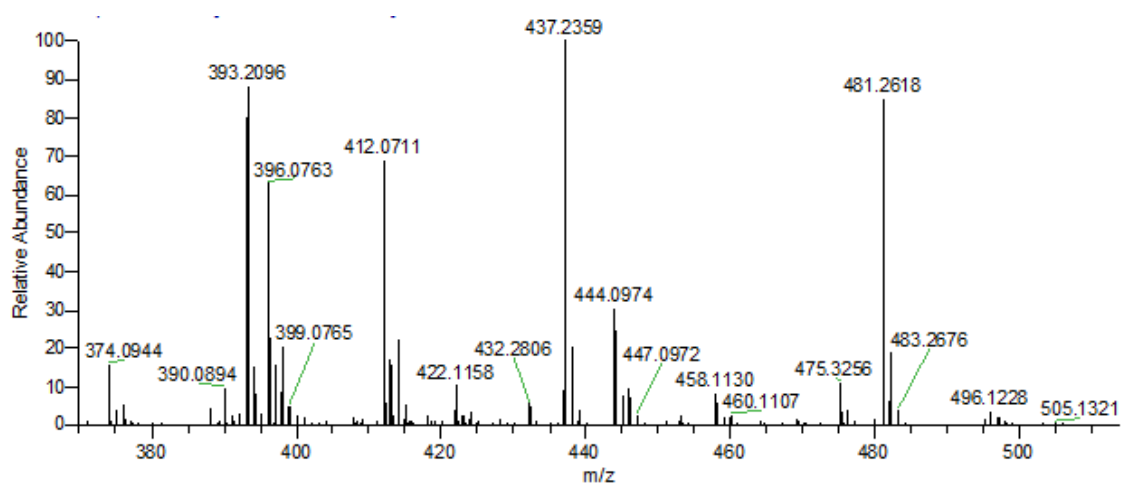

Figure S120. High resolution mass spectrum of compound B5.

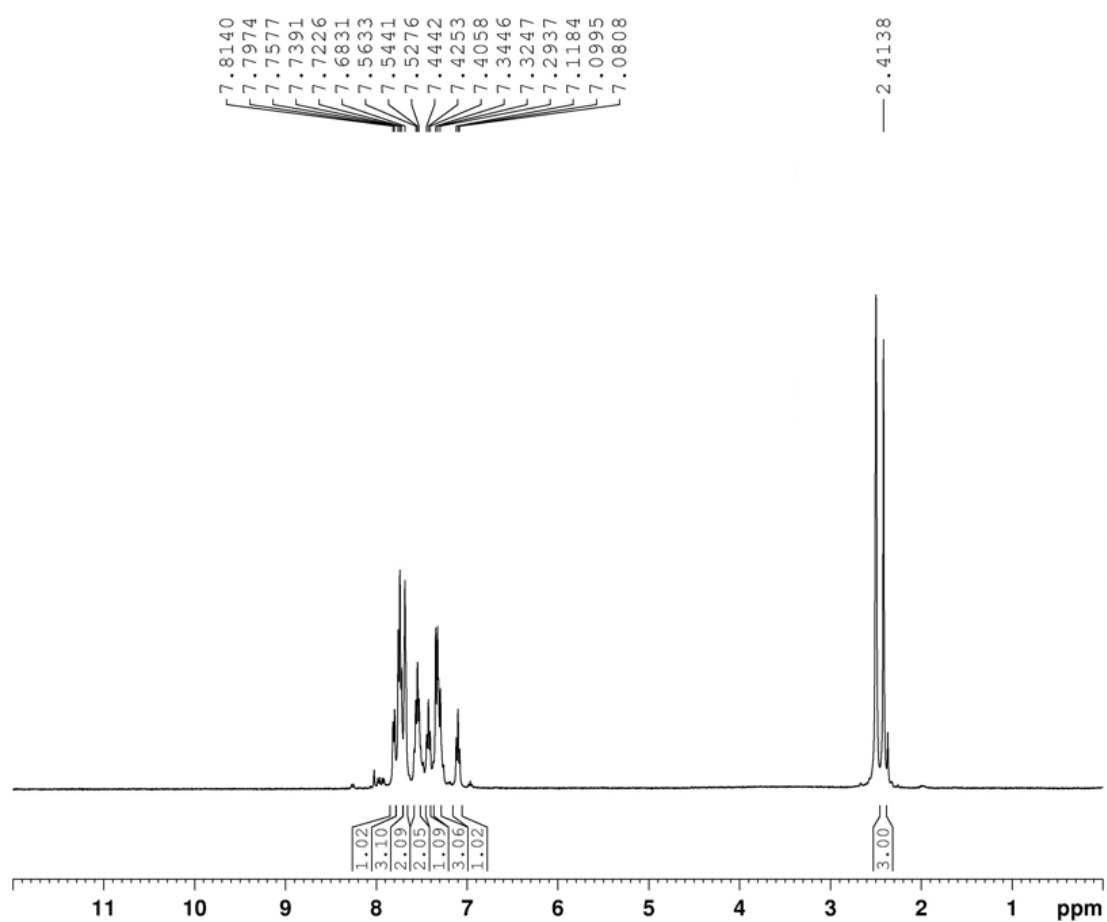

Figure S121.  $^1\text{H}$  NMR spectrum of compound B6 (400 MHz, DMSO).

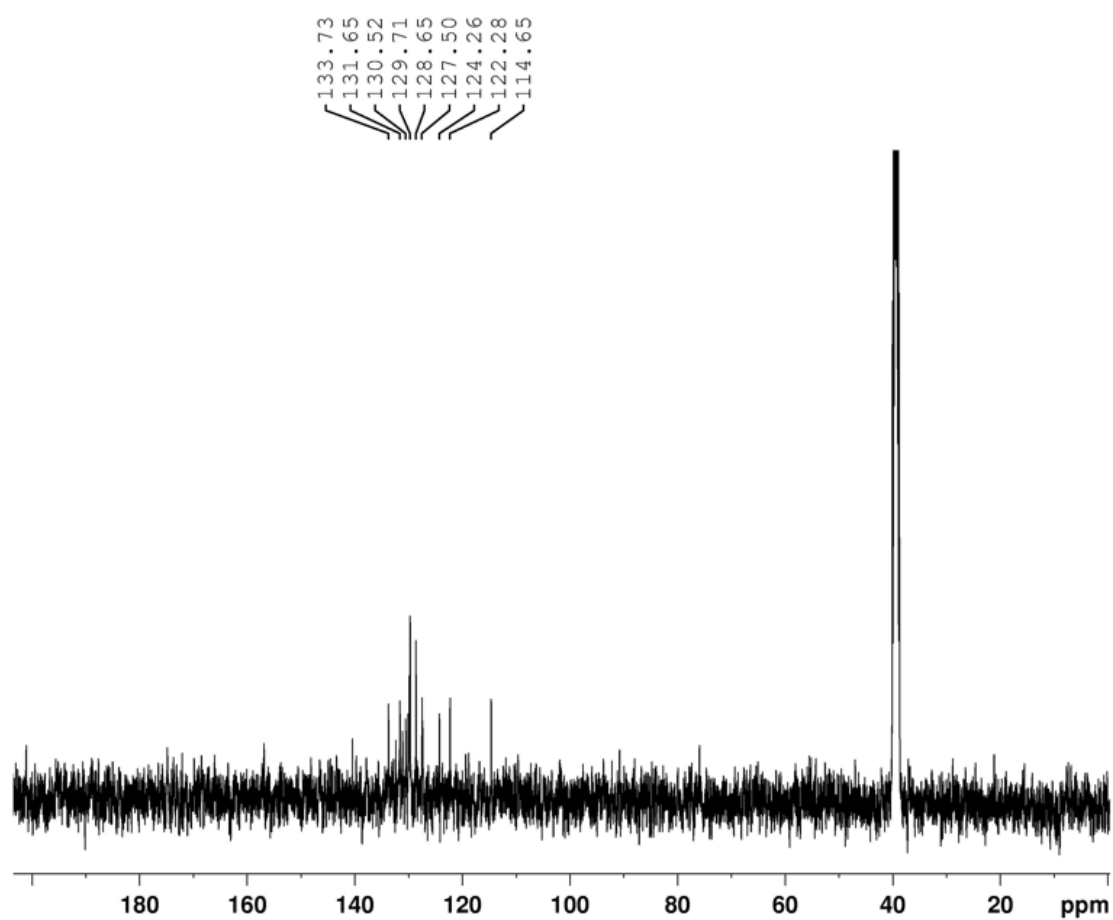

Figure S122.  $^{13}\text{C}$  NMR spectrum of compound B6 (101 MHz, DMSO).

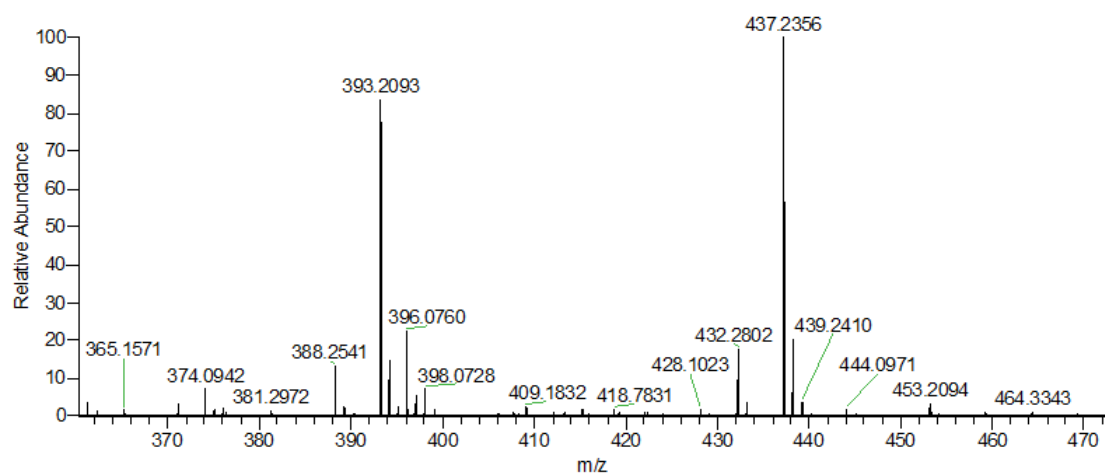

Figure S123. High resolution mass spectrum of compound B6.

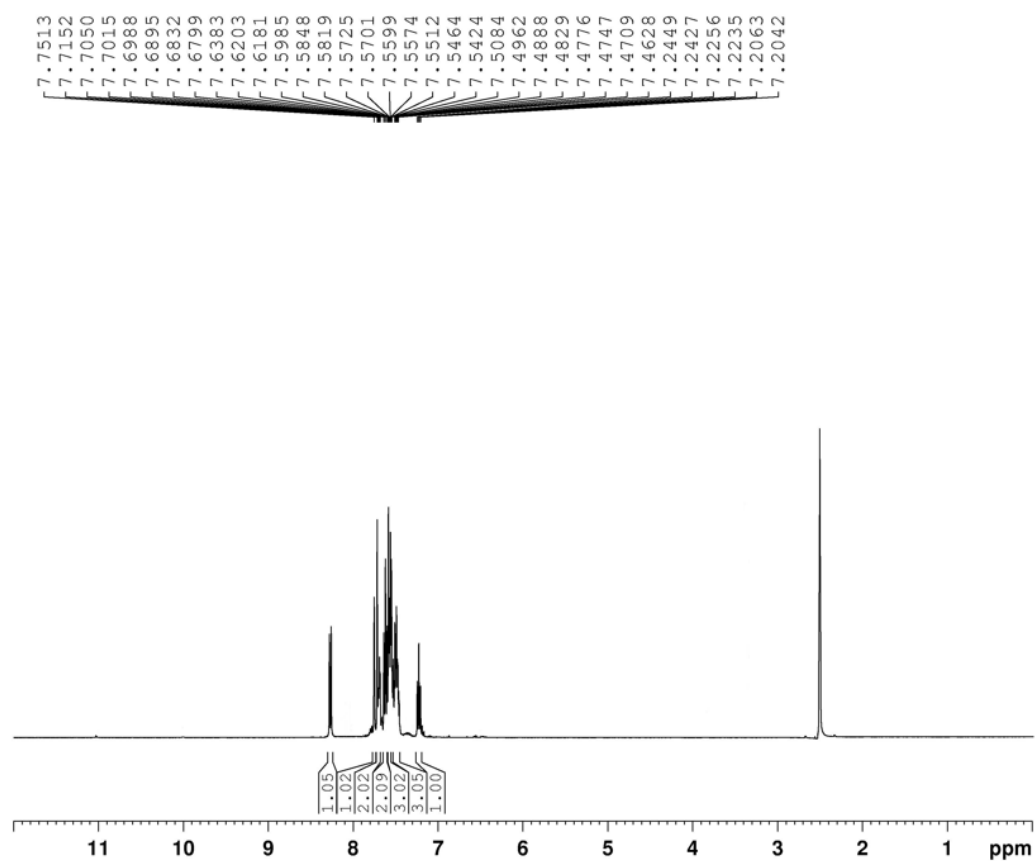

Figure S124. <sup>1</sup>H NMR spectrum of compound B7 (400 MHz, DMSO).

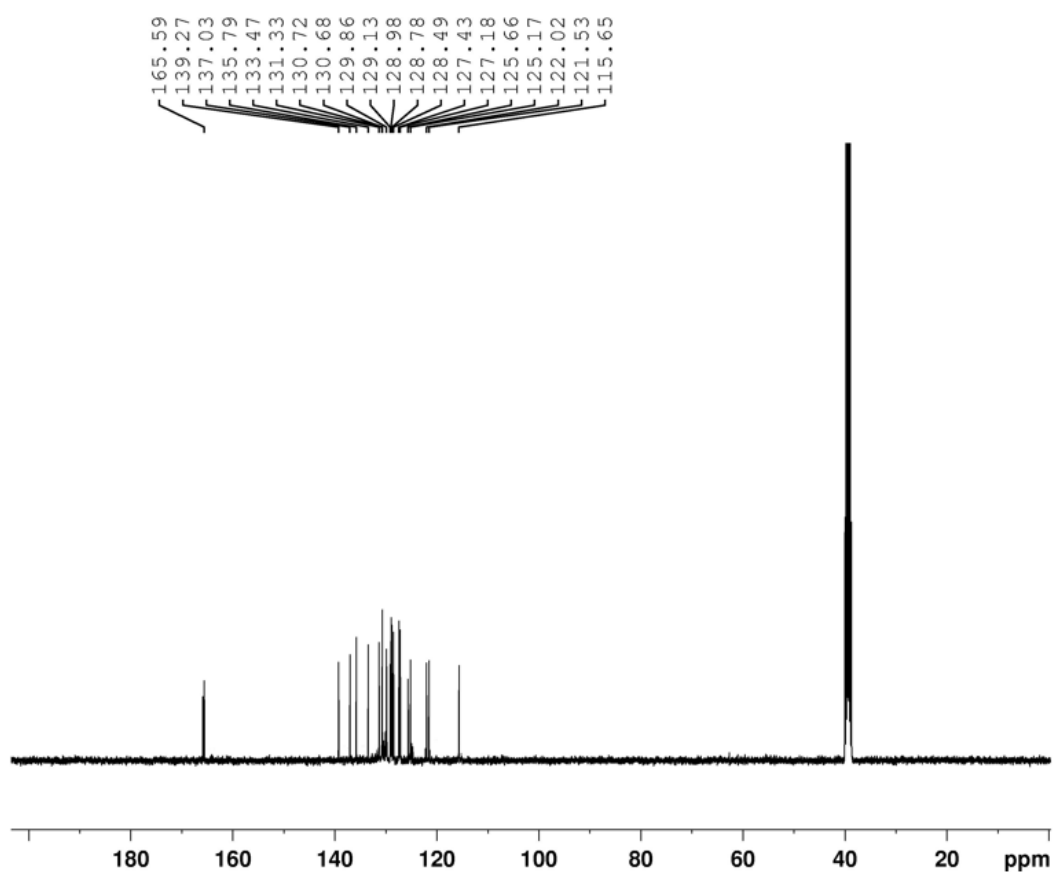

Figure S125. <sup>13</sup>C NMR spectrum of compound B7 (101 MHz, DMSO).



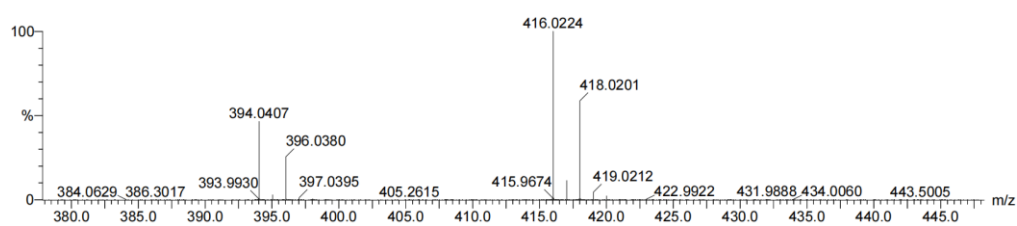

Figure S126. High resolution mass spectrum of compound B7.

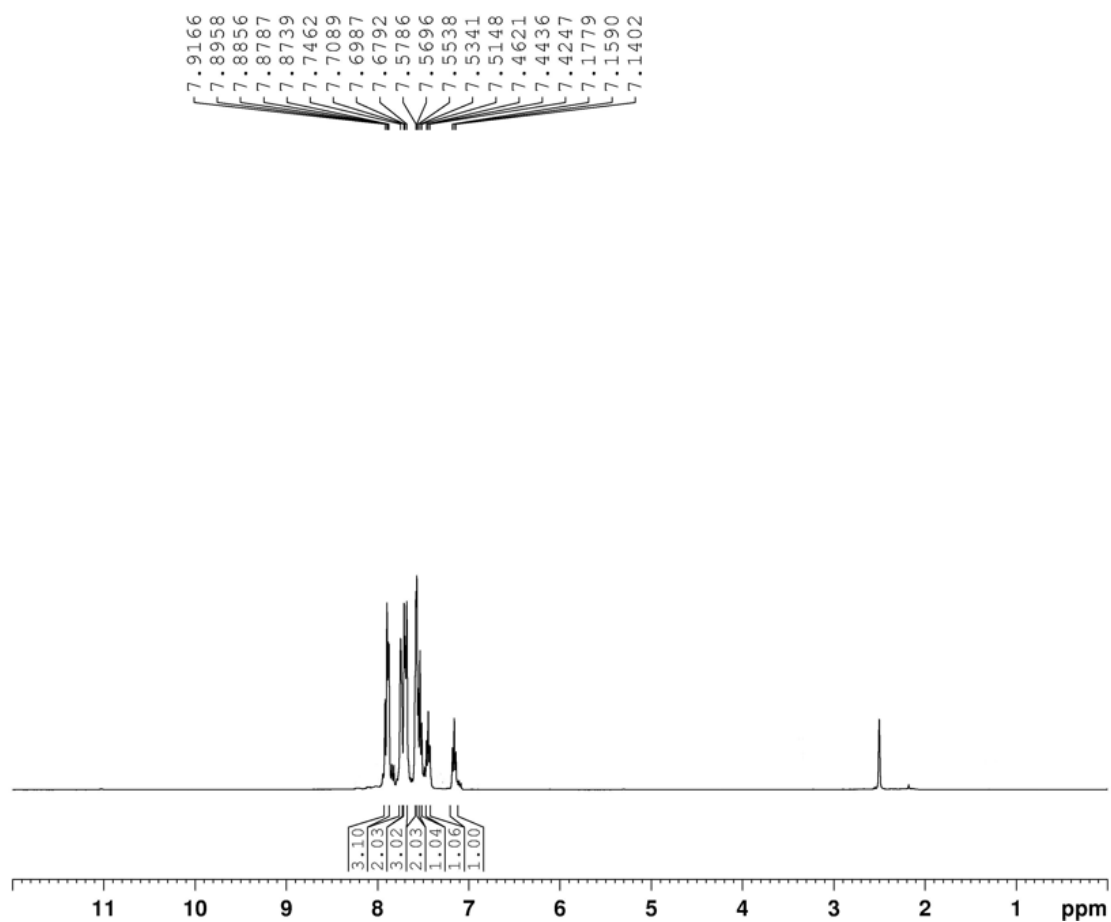

Figure S127.  $^1\text{H}$  NMR spectrum of compound B8 (400 MHz, DMSO).

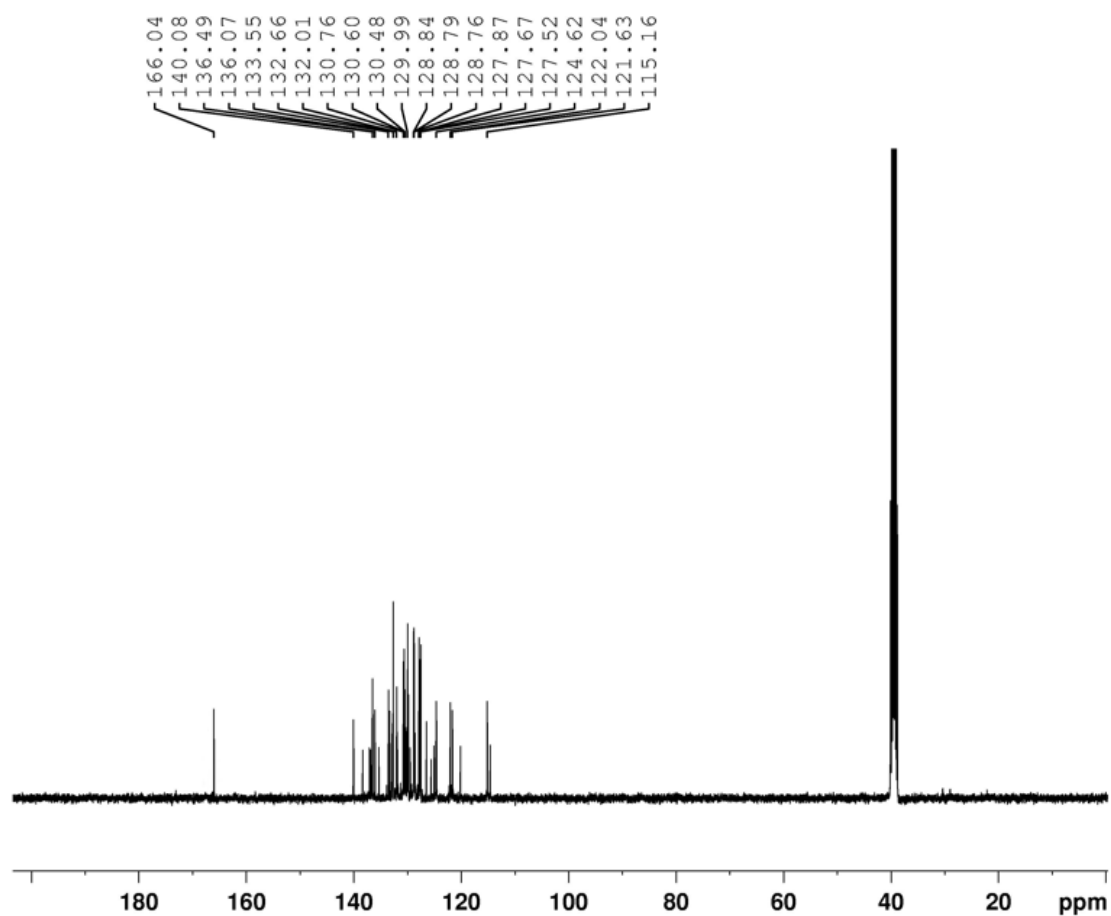

Figure S128. <sup>13</sup>C NMR spectrum of compound B8 (101 MHz, DMSO).

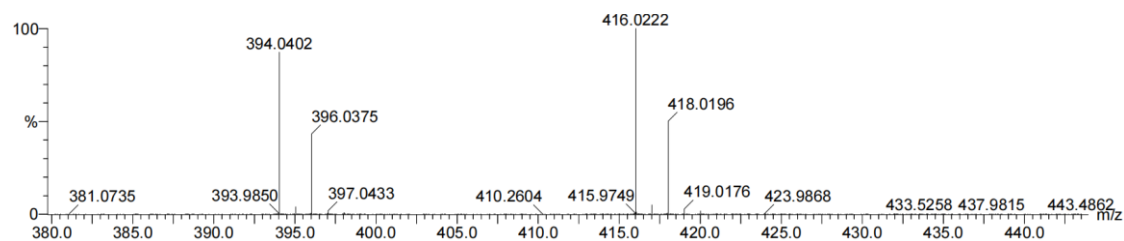

Figure S129. High resolution mass spectrum of compound B8.

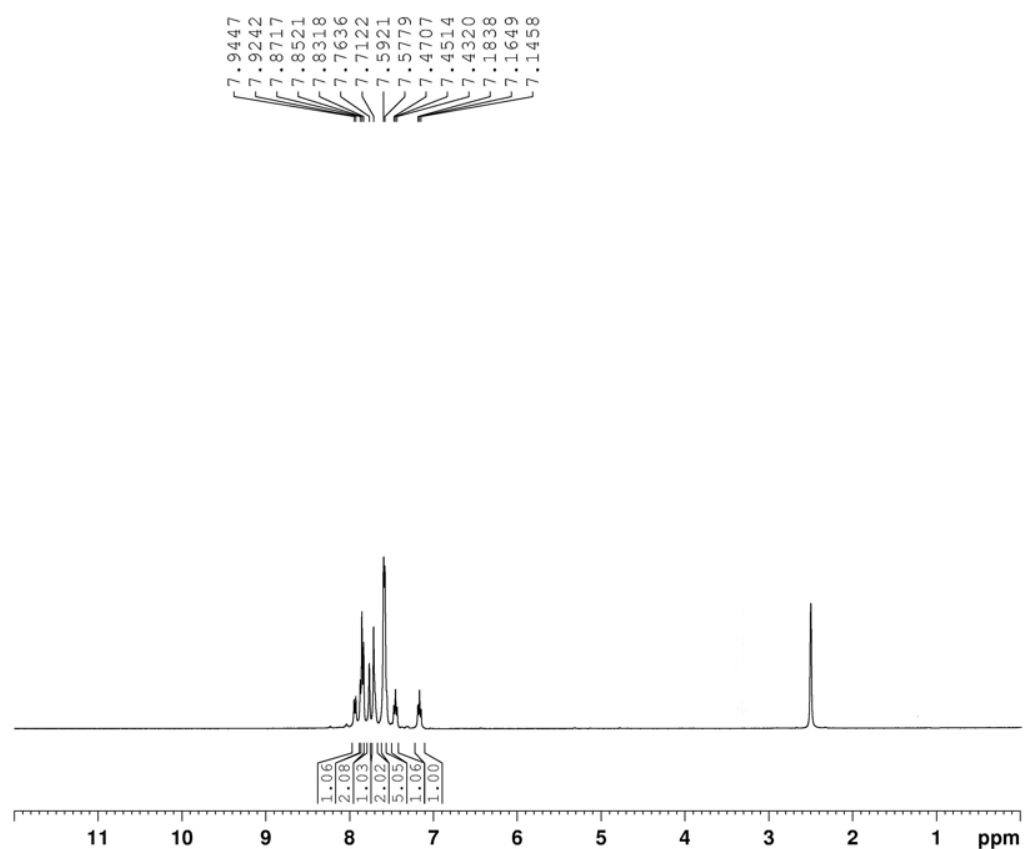

Figure S130. <sup>1</sup>H NMR spectrum of compound B9 (400 MHz, DMSO).

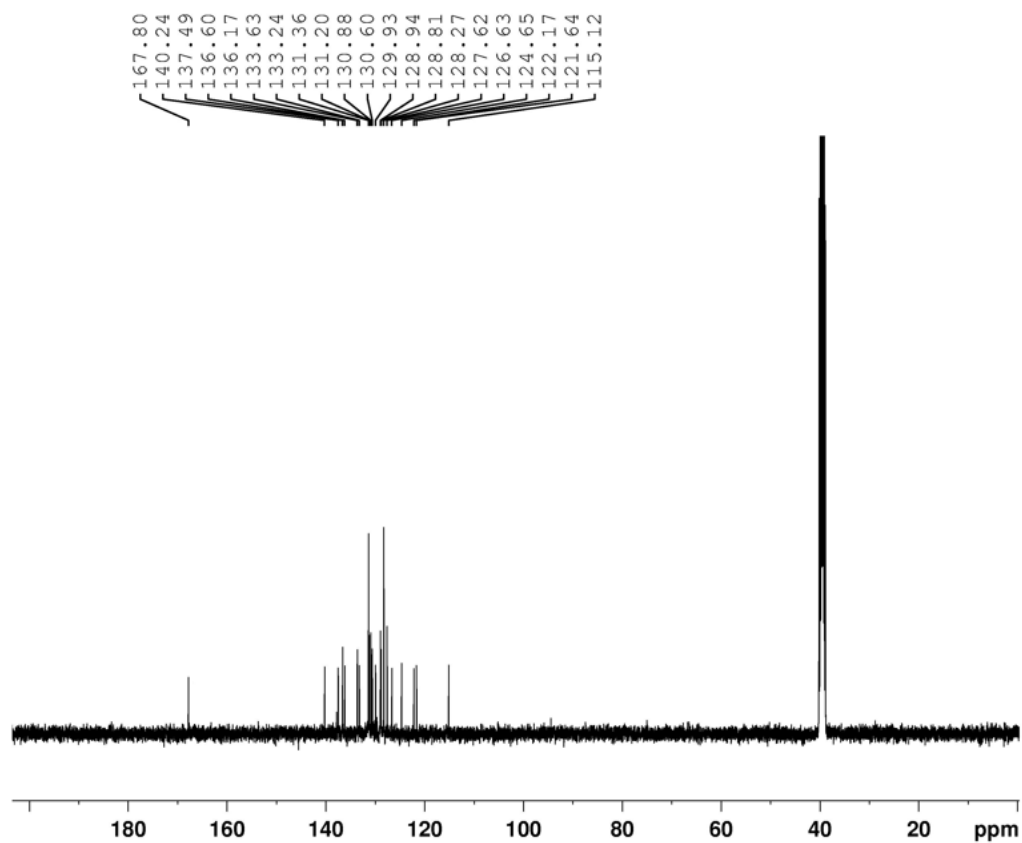

Figure S131. <sup>13</sup>C NMR spectrum of compound B9 (101 MHz, DMSO).

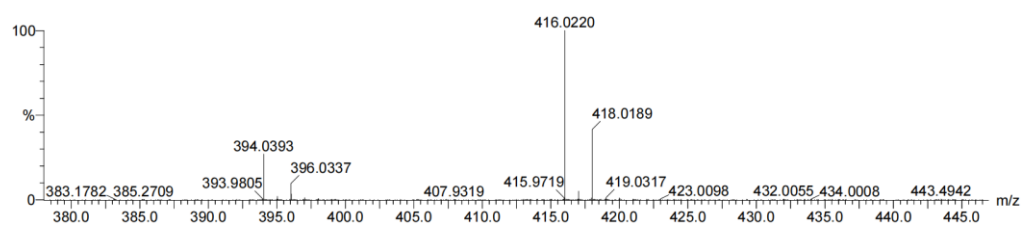

Figure S132. High resolution mass spectrum of compound B9.

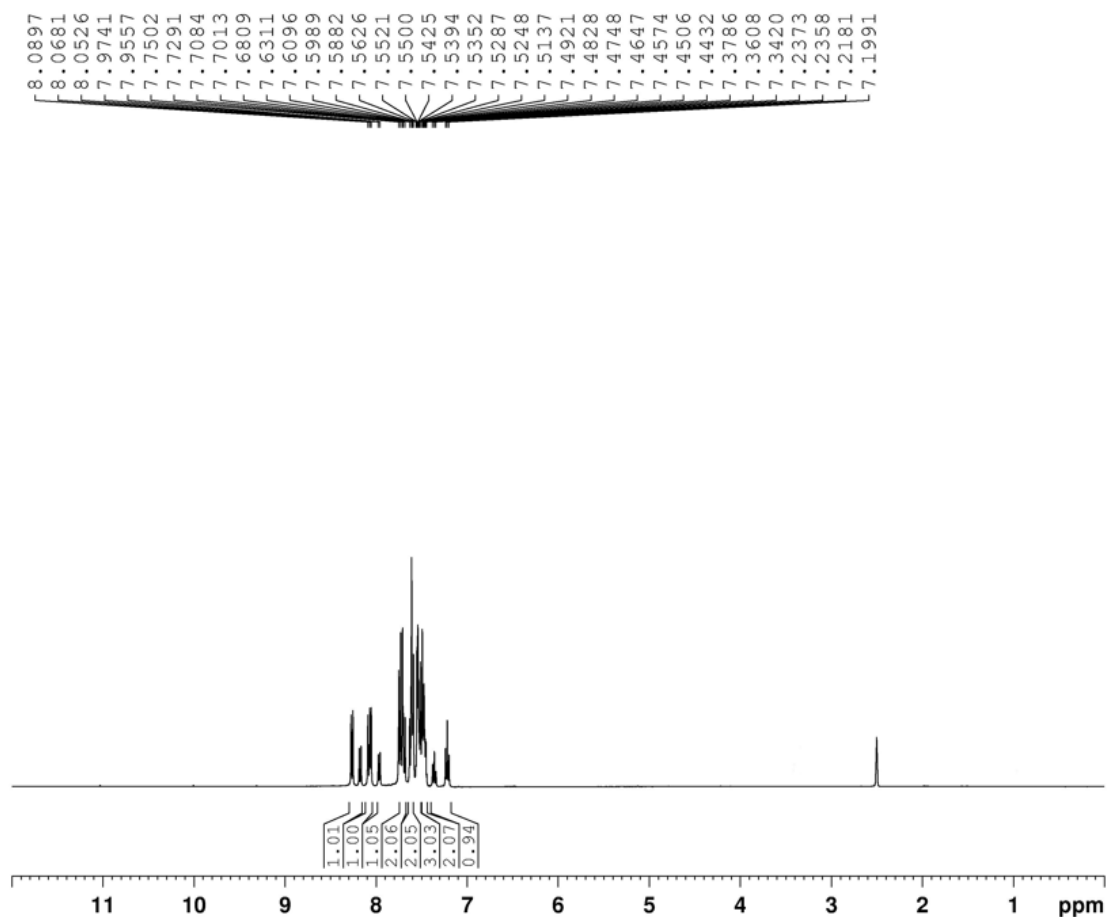

Figure S133. <sup>1</sup>H NMR spectrum of compound B10 (400 MHz, DMSO).

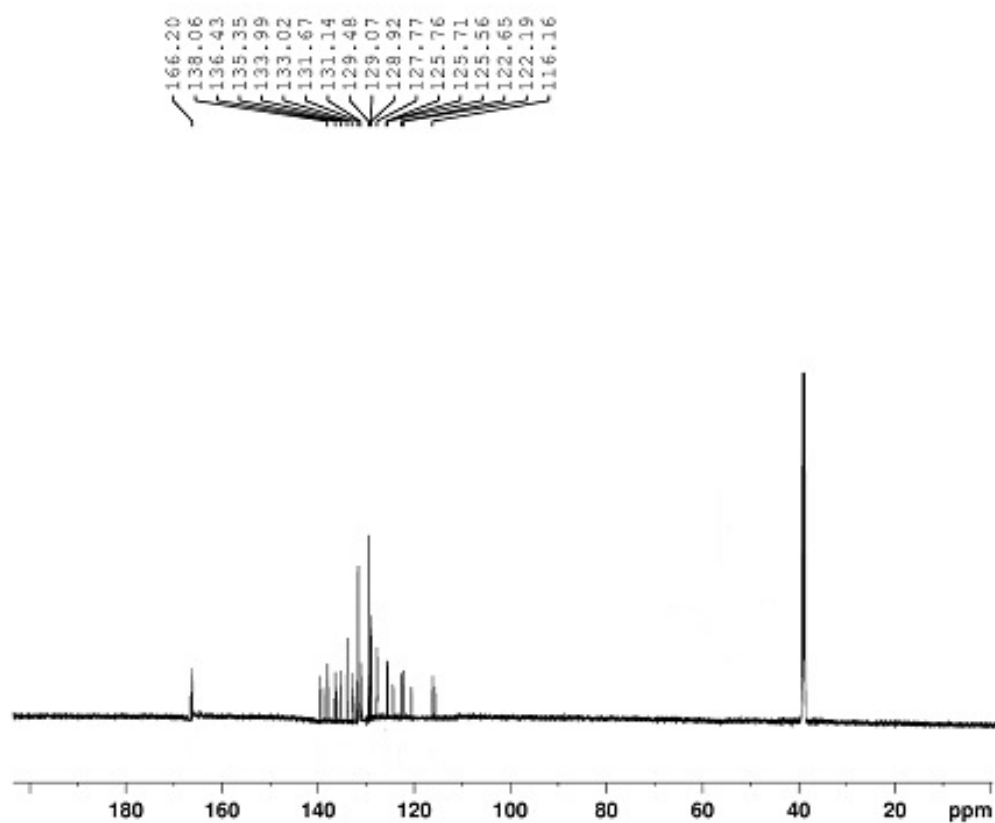

Figure S134. <sup>13</sup>C NMR spectrum of compound B10 (101 MHz, DMSO).

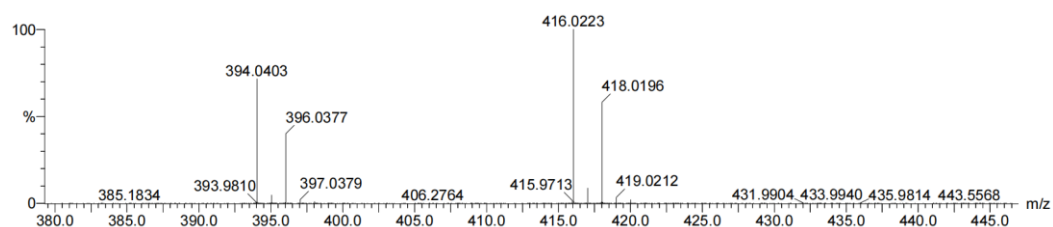

Figure S135: High resolution mass spectrum of compound B10.
